# Supplementary material for: The design and synthesis of 2,3-diphenylquinoxaline amine derivatives as yellow-blue emissive materials for optoelectrochemical study
Source: Royal Society of Chemistry journal article supplement (doi:10.1039/c9nj00248k), 2019-01-01
Supplement: c9nj00248k1.pdf [file c9nj00248k1.pdf]

**Design and Synthesis of 2,3-dipheylquinoxaline Amine derivatives as Yellow-Blue  
Emissive materials for Optoelectrochemical study**

Pooja S. Singh,<sup>a</sup> Sajeev Chacko,<sup>b</sup> and Rajesh M. Kamble\*<sup>a</sup>

<sup>a</sup>Department of Chemistry, University of Mumbai, Santacruz (E), Mumbai 400 098, India

<sup>b</sup>Department of Physics, University of Mumbai, Santacruz (E), Mumbai 400 098, India

Email: kamblerm@chem.mu.ac.in

---

**Supporting information**

|           |                                                                              |           |
|-----------|------------------------------------------------------------------------------|-----------|
| <b>1</b>  | Absorption spectra of compound <b>1-9</b> in various solvents                | <b>3</b>  |
| <b>2</b>  | Emission images of <b>1-9</b> in various solvent and neat solid film.        | <b>4</b>  |
| <b>3</b>  | Emission of <b>1-9</b> in various solvents                                   | <b>5</b>  |
| <b>4</b>  | AIE photophysical spectrum and luminescence photograph.                      | <b>7</b>  |
| <b>5</b>  | Cyclic voltammetry (CV) of compounds <b>1-9</b> in anhydrous dichloromethane | <b>10</b> |
| <b>6</b>  | DSC plot of compounds <b>2-9</b>                                             | <b>12</b> |
| <b>7</b>  | MALDI-TOF spectra of compounds <b>1-9</b>                                    | <b>13</b> |
| <b>8</b>  | FTIR Spectra of compounds <b>1-9</b>                                         | <b>18</b> |
| <b>9</b>  | <sup>1</sup> H and <sup>13</sup> C NMR spectra of compounds <b>1-9</b>       | <b>23</b> |
| <b>10</b> | Optimized structures of compounds <b>1-9</b>                                 | <b>32</b> |
| <b>11</b> | Frontier molecular orbitals of compound <b>1-9</b>                           | <b>37</b> |

|           |                                                                                     |           |
|-----------|-------------------------------------------------------------------------------------|-----------|
| <b>11</b> | Cartesian coordinates and Charges (Mulliken and Lowdin) of compounds <b>1 9</b>     | <b>42</b> |
|           | <b>Table S2.</b> Cartesian coordinates of optimized structure of compound <b>1</b>  |           |
|           | <b>Table S3.</b> Cartesian coordinates of optimized structure of compound <b>2</b>  |           |
|           | <b>Table S4.</b> Cartesian coordinates of optimized structure of compound <b>3</b>  |           |
|           | <b>Table S5.</b> Cartesian coordinates of optimized structure of compound <b>4</b>  |           |
|           | <b>Table S6.</b> Cartesian coordinates of optimized structure of compound <b>5</b>  |           |
|           | <b>Table S7.</b> Cartesian coordinates of optimized structure of compound <b>6</b>  |           |
|           | <b>Table S8.</b> Cartesian coordinates of optimized structure of compound <b>7</b>  |           |
|           | <b>Table S9.</b> Cartesian coordinates of optimized structure of compound <b>8</b>  |           |
|           | <b>Table S10.</b> Cartesian coordinates of optimized structure of compound <b>9</b> |           |
| <b>12</b> | Vertical electronic transition in implicit water phase                              | <b>65</b> |

## 1. Absorption spectra of compounds 1–9 in various solvents.

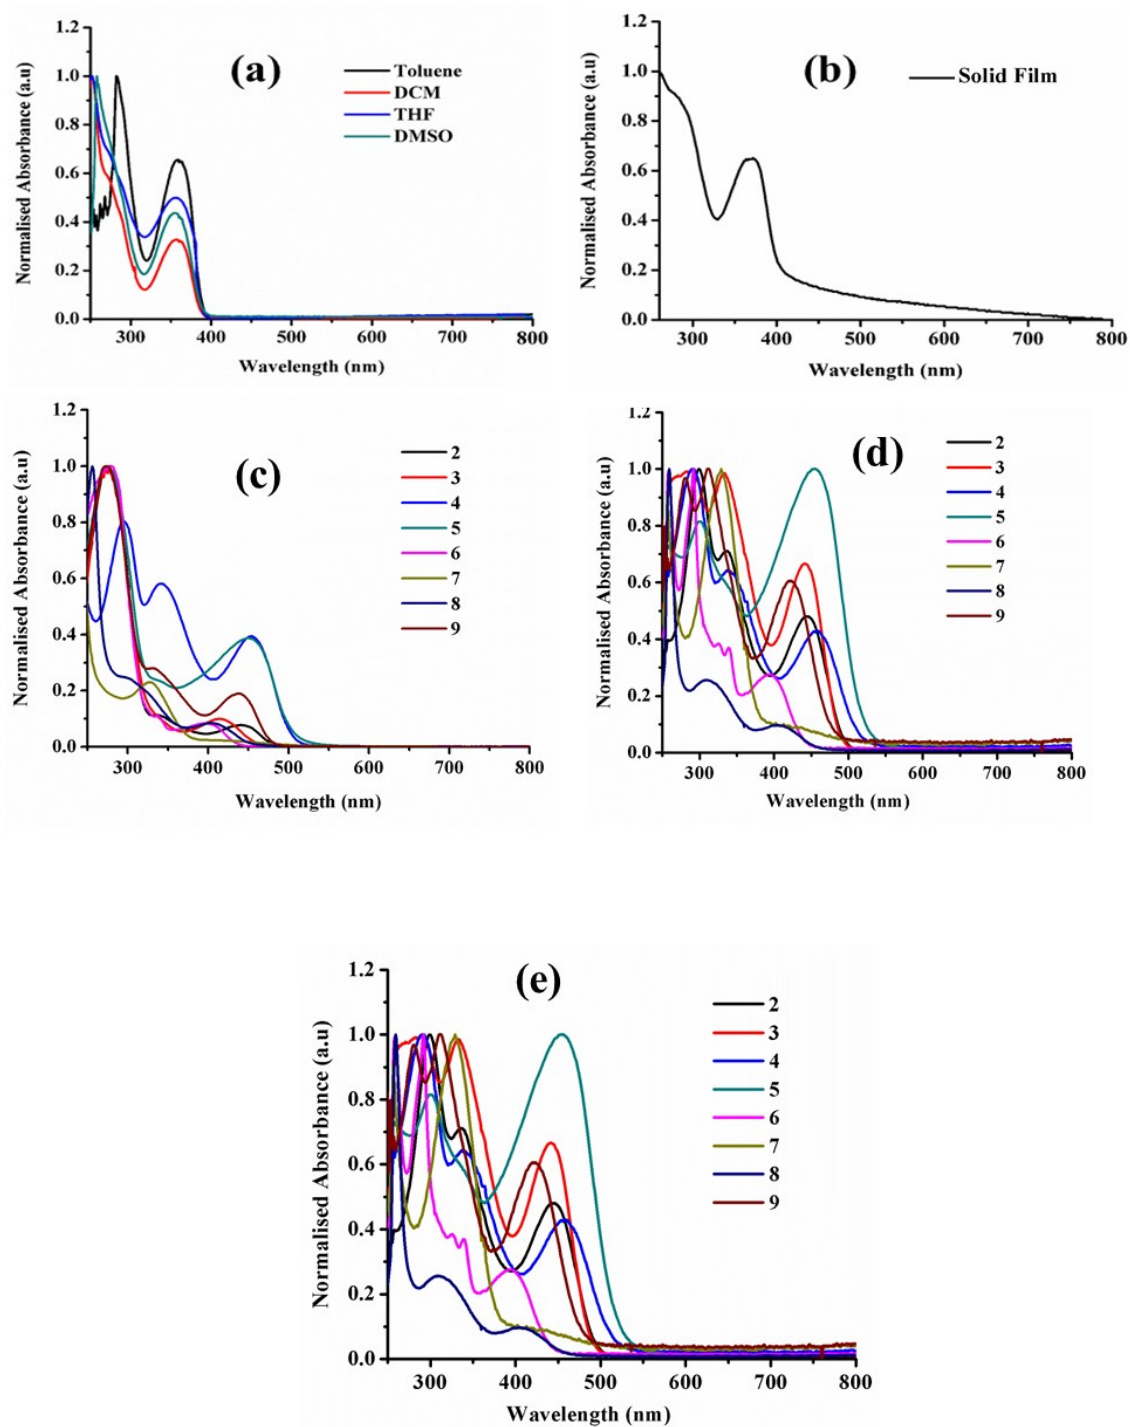

**Fig. S1.** UV–Vis absorption spectra of compound 1 in various solvents (a), and neat solid film (b), UV–Vis absorption spectra of compounds 2–9 in dichloromethane (c) tetrahydrofuran (d) and dimethyl sulfoxide (e).

## 2. Emission images of 1–9 in various solvent and neat solid film.

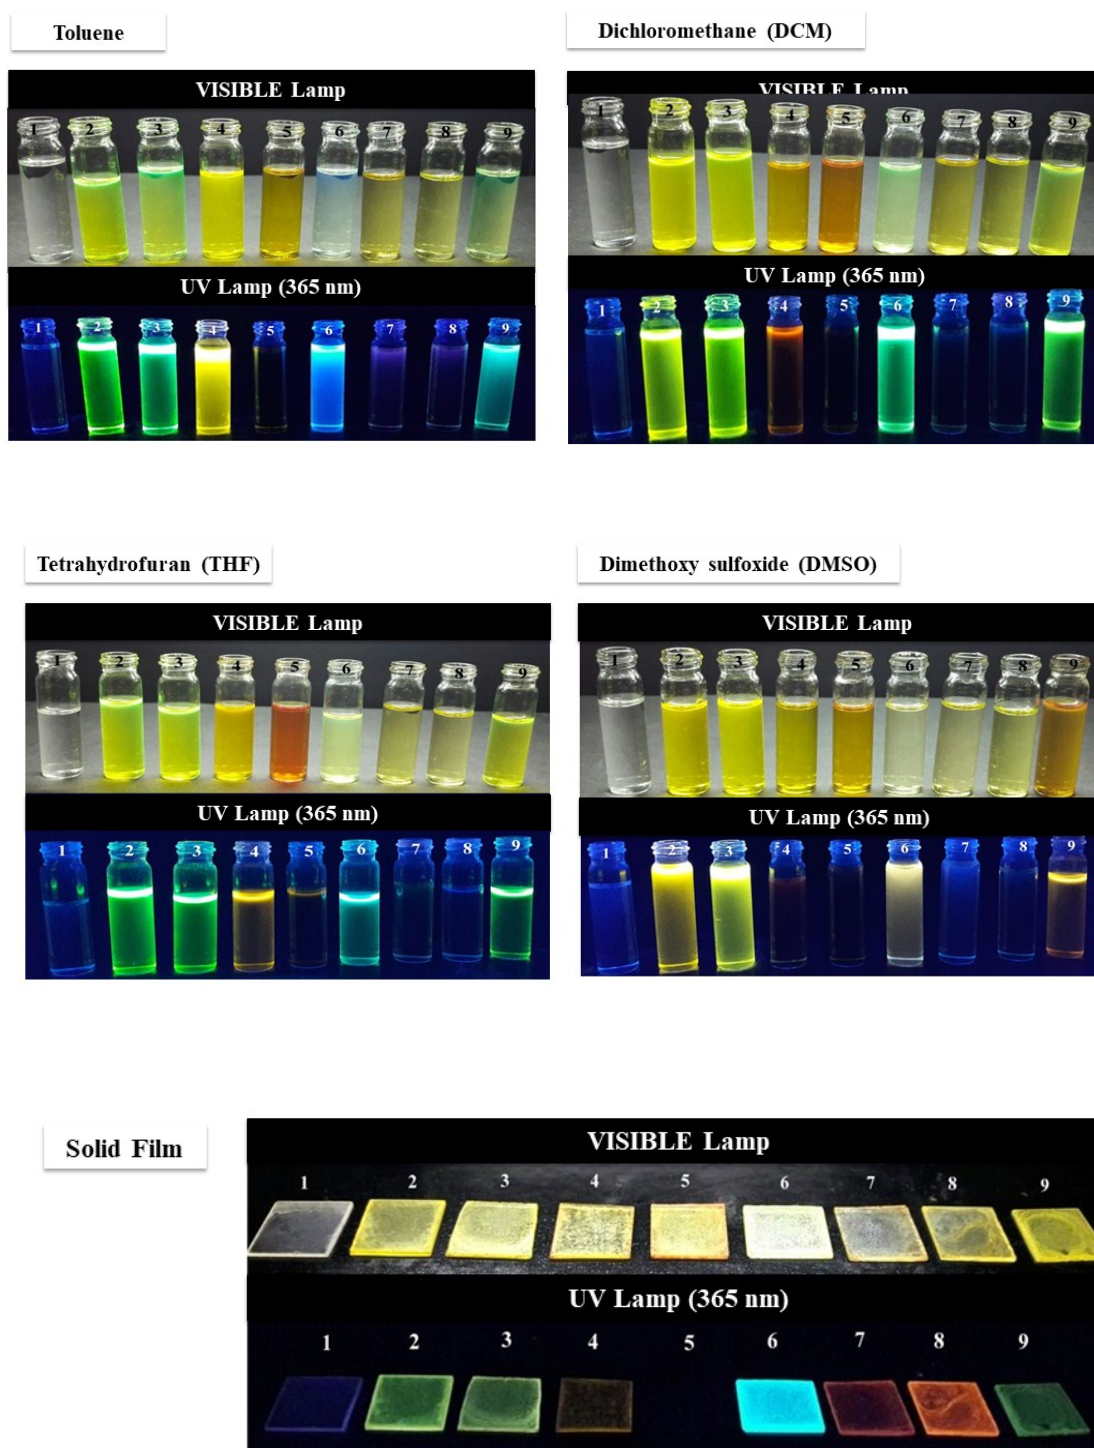

**Fig. S2.** Luminescence of 2–9 in various solvents and neat solid film under Visible (above) and 365nm UV lamp (below).

### 3. Emission of 1–9 in various solvents.

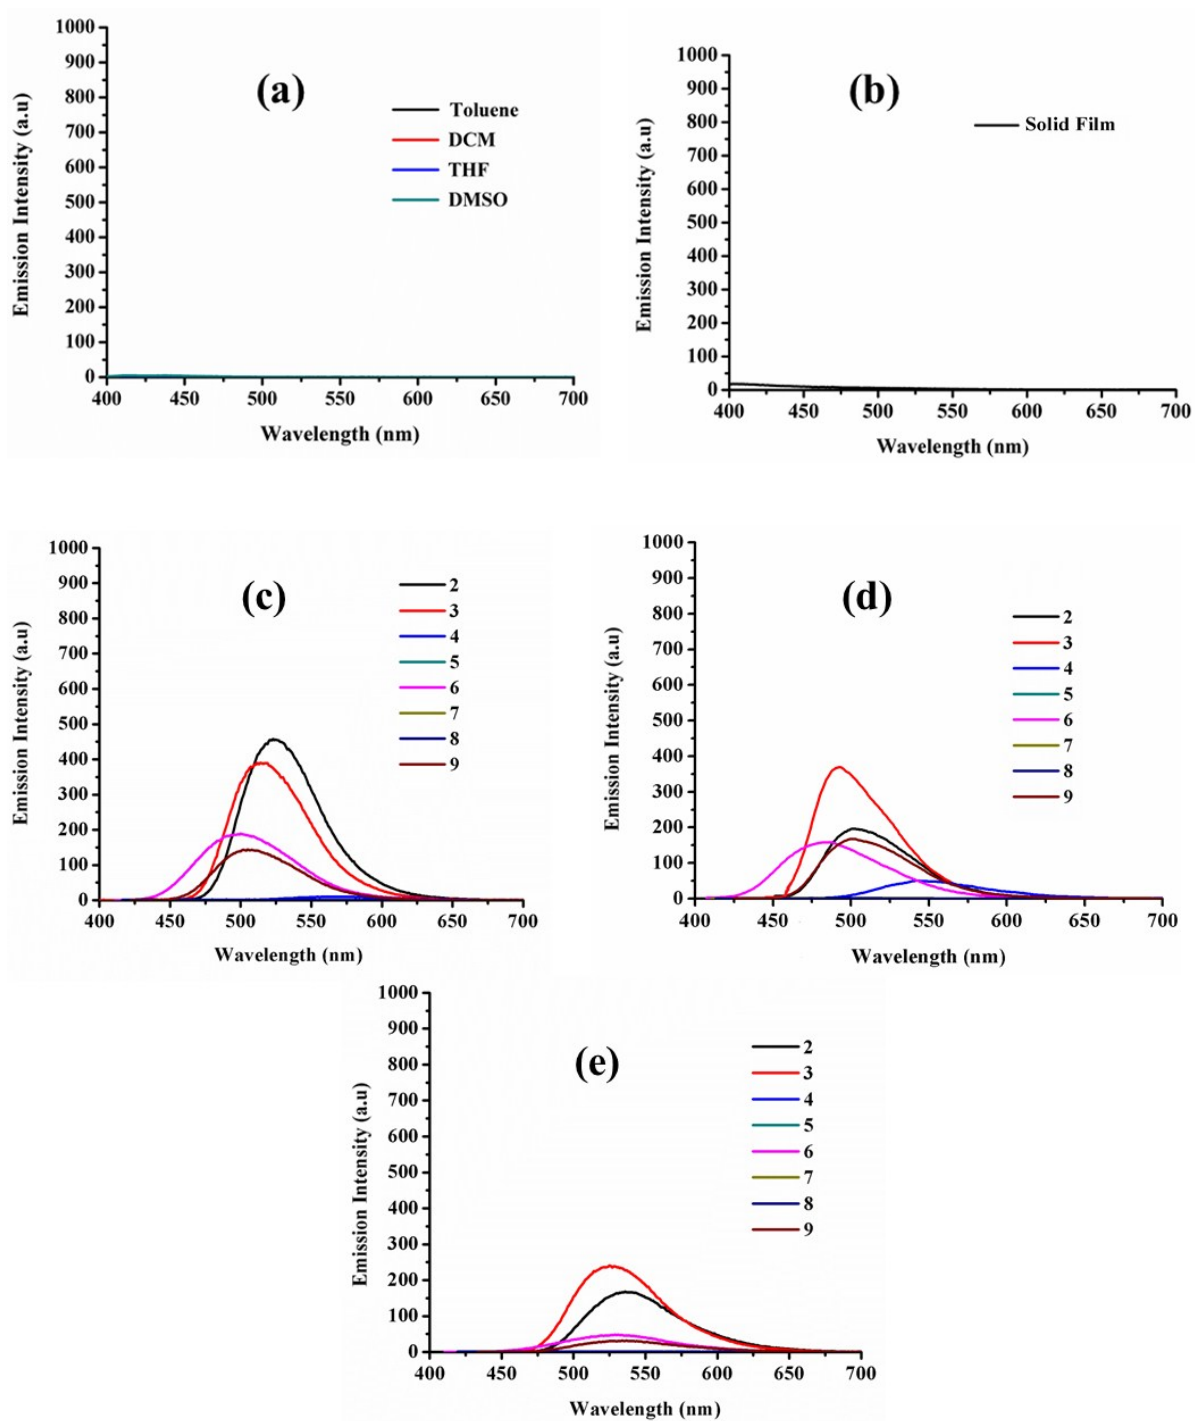

**Fig. S3.** Emission spectra (recorded in  $10^{-5}$  M solution) of compounds **1** in various solvents (a) and neat solid film (b), Emission spectra **2–9** in DCM (c), THF (d) and DMSO (e).

**Table S1.** Stoke shift and quantum yield of **1–9** in DCM, THF and DMSO.

| Compd | Stokes shift, cm <sup>-1</sup><br>( $\phi_F$ ) <sup>a</sup> |                |                |
|-------|-------------------------------------------------------------|----------------|----------------|
|       | DCM                                                         | THF            | DMSO           |
| 1     | —                                                           | —              | —              |
| 2     | 3503<br>(0.42)                                              | 2795<br>(0.70) | 3866<br>(0.19) |
| 3     | 3169<br>(0.44)                                              | 2910<br>(0.69) | 3628<br>(0.32) |
| 4     | 4290<br>(0.02)                                              | 3644<br>(0.18) | —              |
| 5     | —                                                           | —              | —              |
| 6     | 4938<br>(0.72)                                              | 4508<br>(0.66) | 6168<br>(0.27) |
| 7     | —                                                           | —              | —              |
| 8     | —                                                           | —              | —              |
| 9     | 4470<br>(0.52)                                              | 4136<br>(0.44) | 4949<br>(0.20) |

Recorded in 10<sup>-5</sup>M solution. <sup>a</sup>Quantum yield (in parentheses) with reference to fluorescein ( $\phi = 0.79$  in 0.1 M NaOH).

#### 4. AIE photophysical spectrum and luminescence photograph.

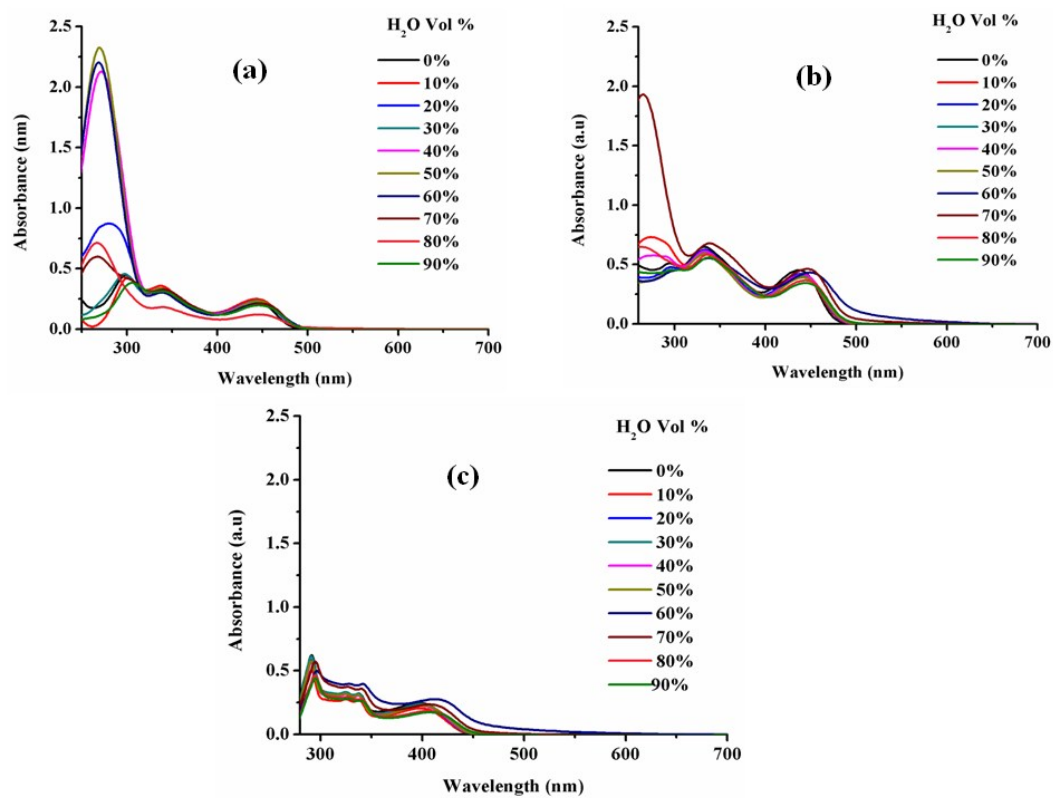

**Fig. S4.** Absorbance spectra of **2** (a), **3** (b) and **6** (c) in THF–water mixtures with different water fractions (10  $\mu$ M).

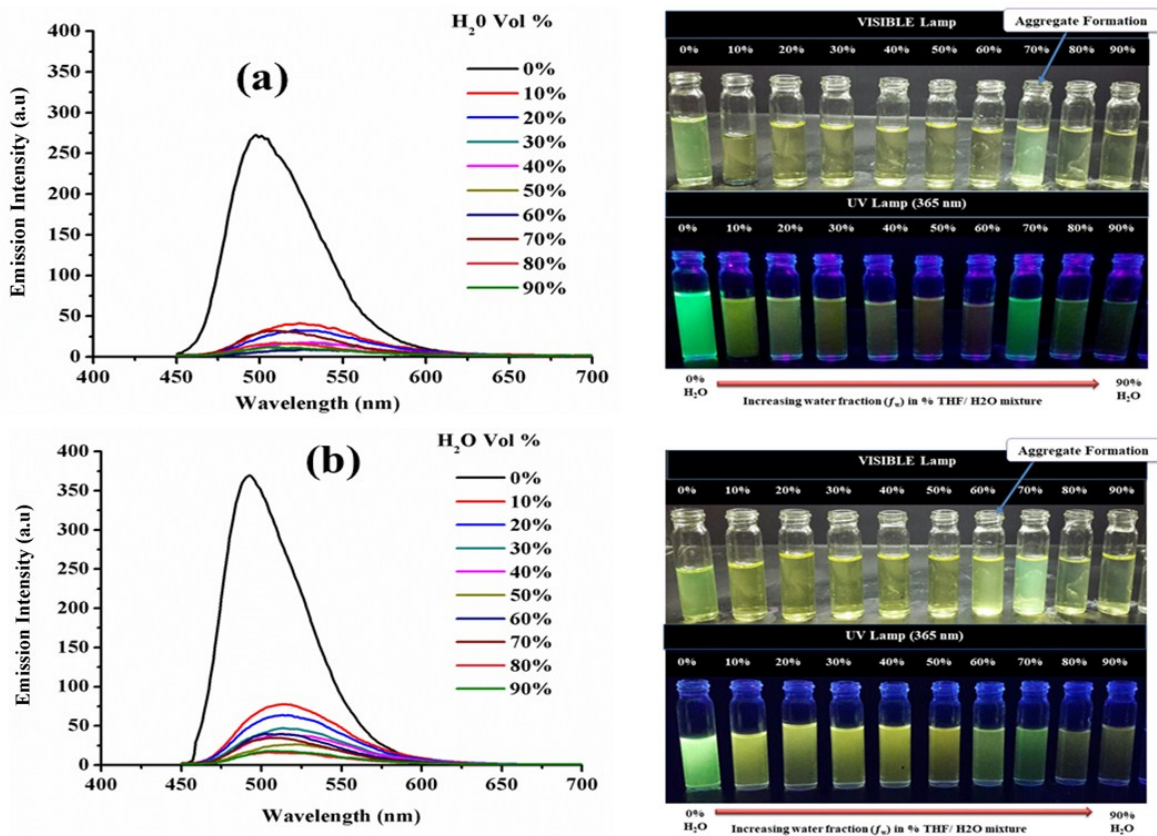

**Fig. S5.** Emission spectra (left) and images (right) of **2** (a) and **3** (b) in THF–water mixtures with different water fractions (10  $\mu$ M) excited at 440 nm.



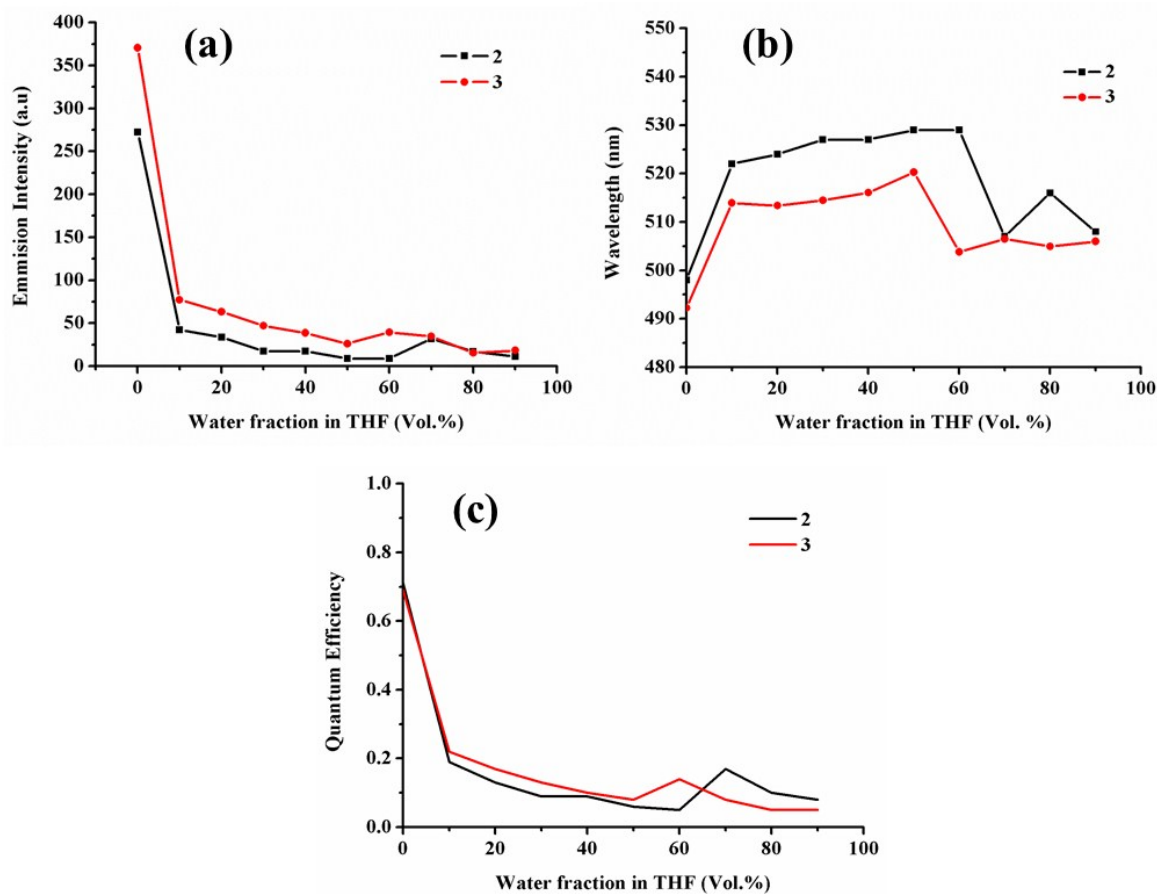

**Fig. S6.** Plot of emission intensity vs. % water fraction of **2** and **3**. **(a)** Plot of wavelength vs. % water fraction of **2** and **3**. **(b)** and plot of Quantum efficiency with reference to fluorescein ( $\phi = 0.79$  in 0.1 M NaOH) of **2** and **3** versus % of water fraction in THF/Water mixture.**(c)**

## 5. Cyclic voltammetry (CV) of compounds 1-9.

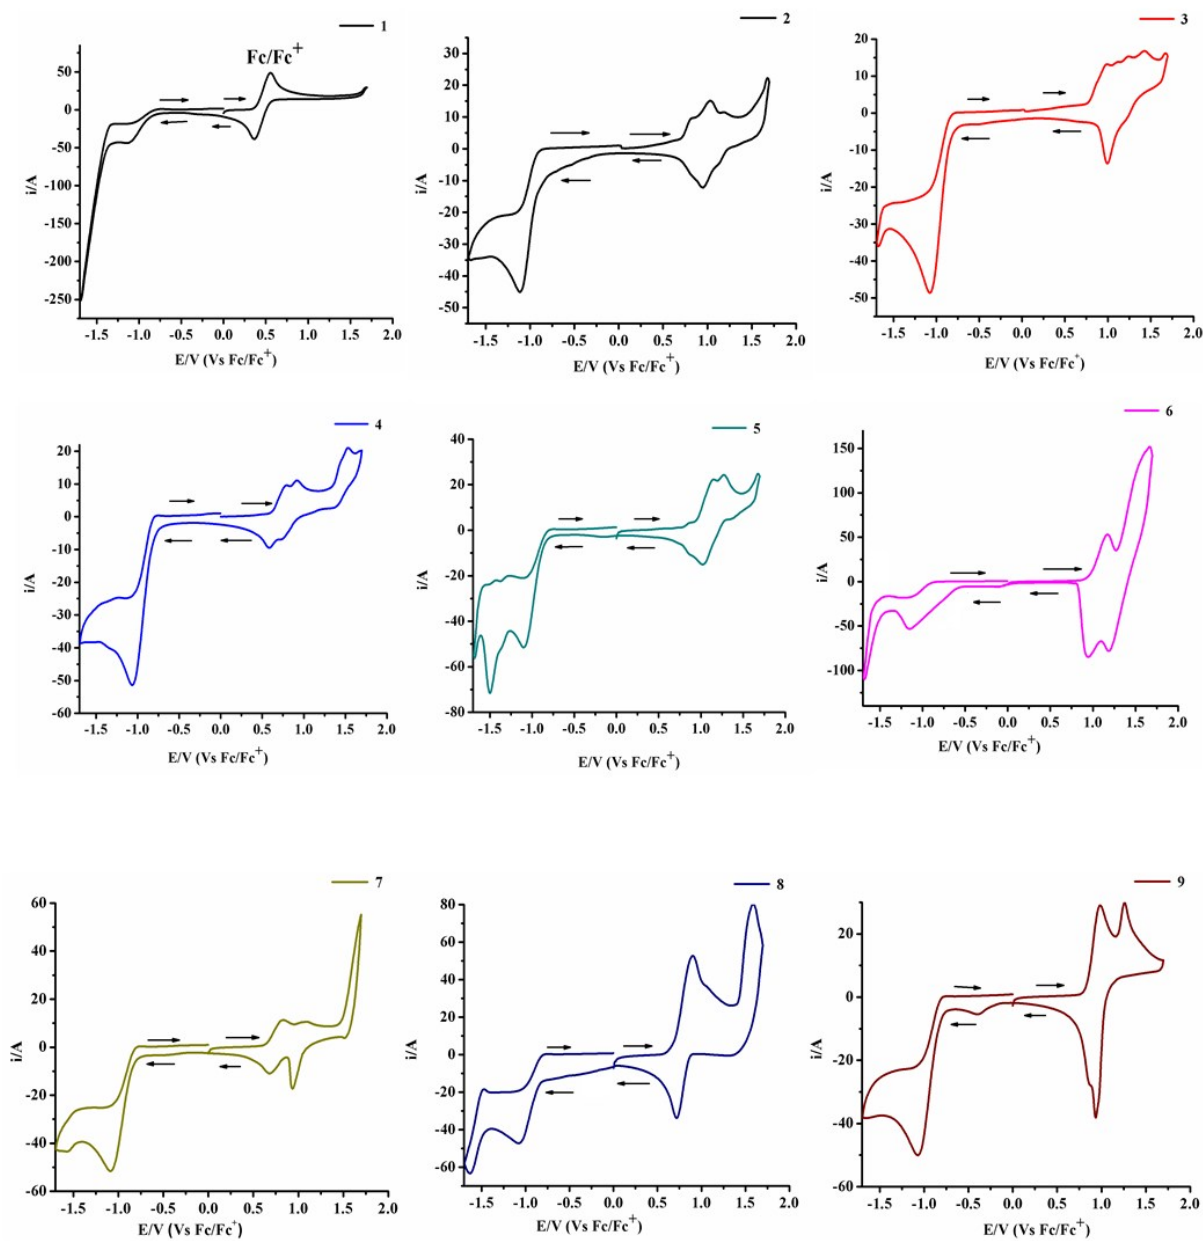

**Fig. S7.** Cyclic voltammogram (full scan) of compounds 1–9.

## Calculation of HOMO energy level of 1 from optical band gap

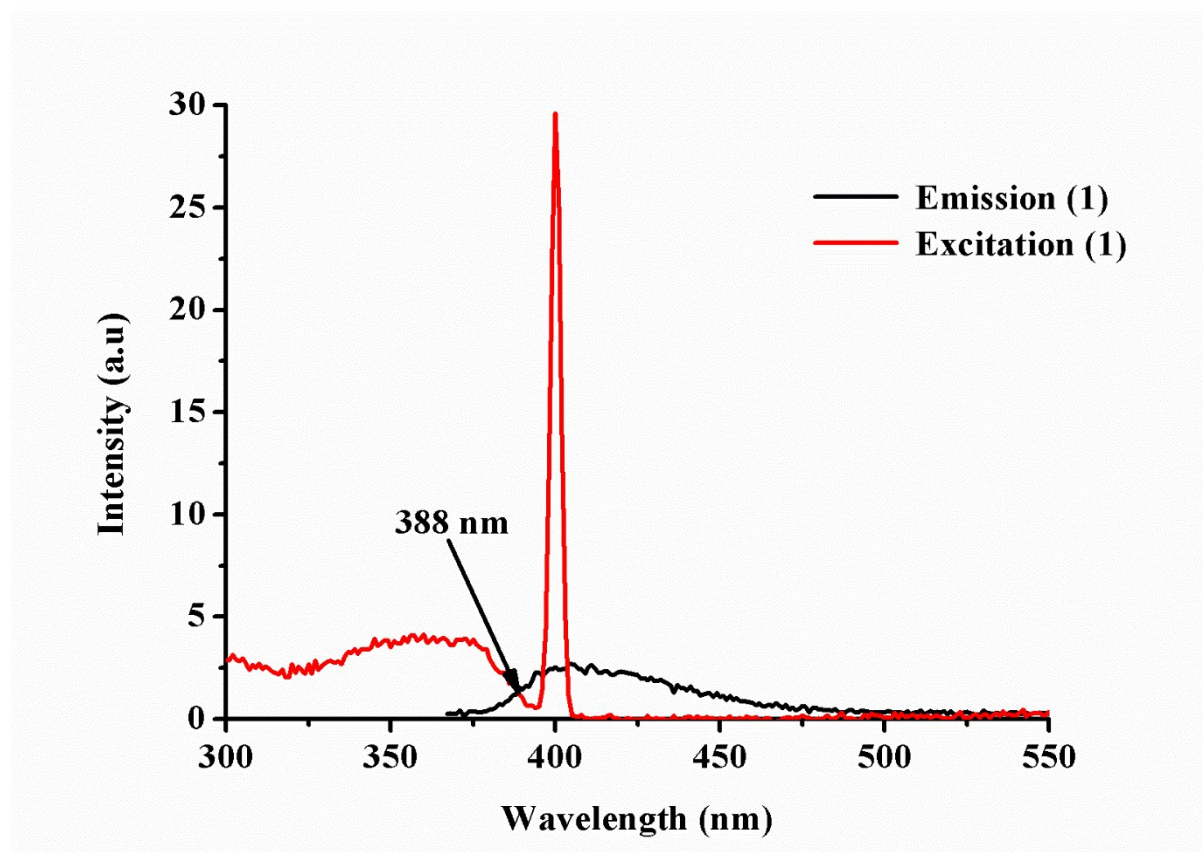

Fig. S8. Excitation and Emission spectra of 1.

Calculation:

$$E_g^{opt} = \frac{1240.8}{\lambda_{optedge}} eV = \frac{1240.8}{388 \text{ nm}} eV = 3.19 \text{ eV}$$

$$\text{HOMO (eV)} = -(E_g^{opt} - \text{LUMO}) \text{ eV} = -[3.19 - (-3.60)] \text{ eV} = -6.79 \text{ eV}$$

## 6. DSC plot of compound 2-9.

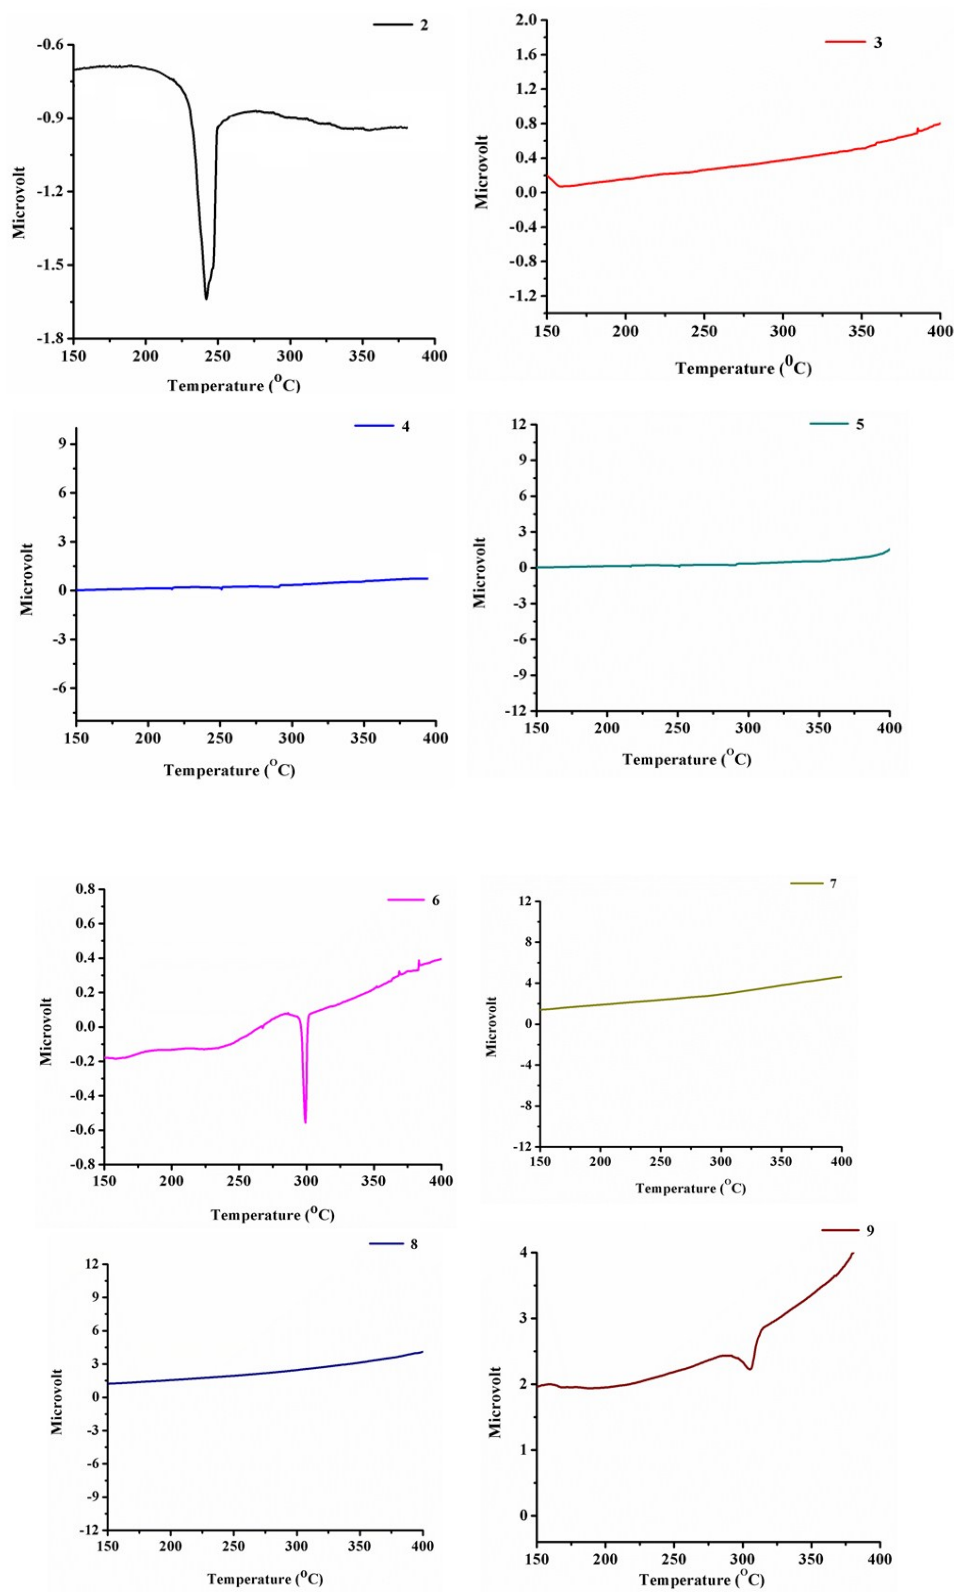

Fig. S9. DSC plot of compounds 2–9.

7. MALDI-TOF Spectra of compounds 1-9.

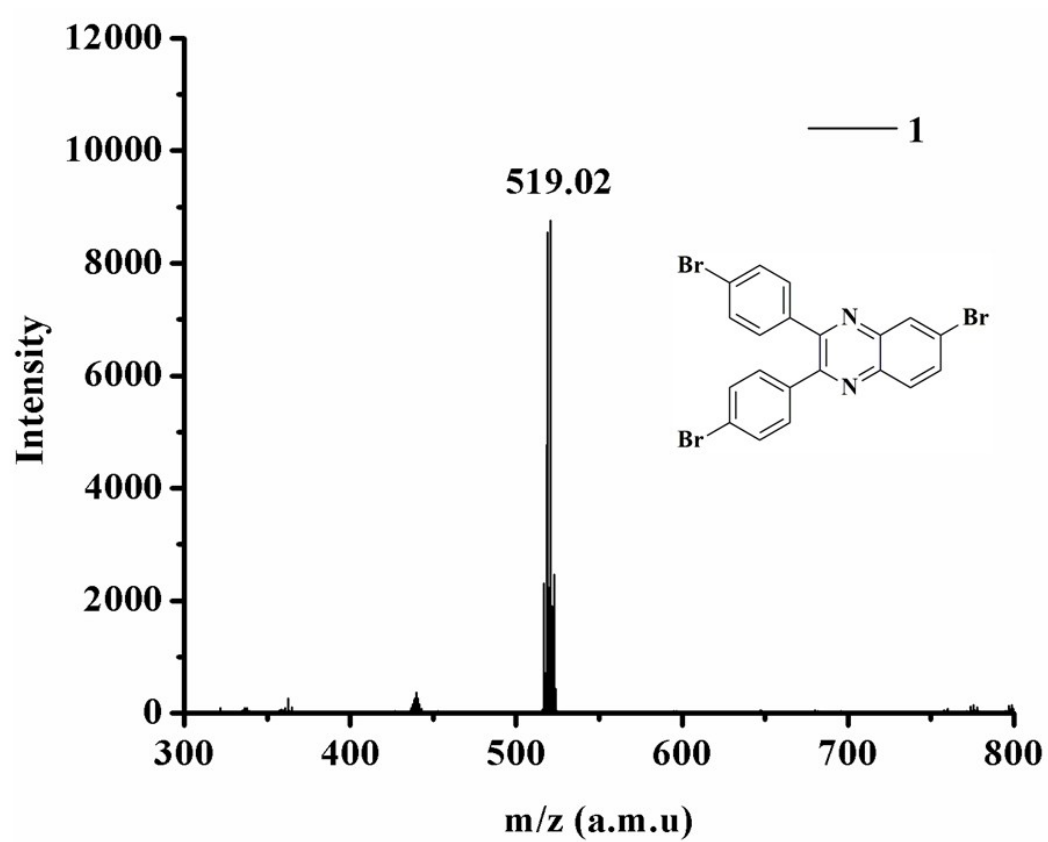

Fig. S10. MALDI-TOF spectrum of compound 1.

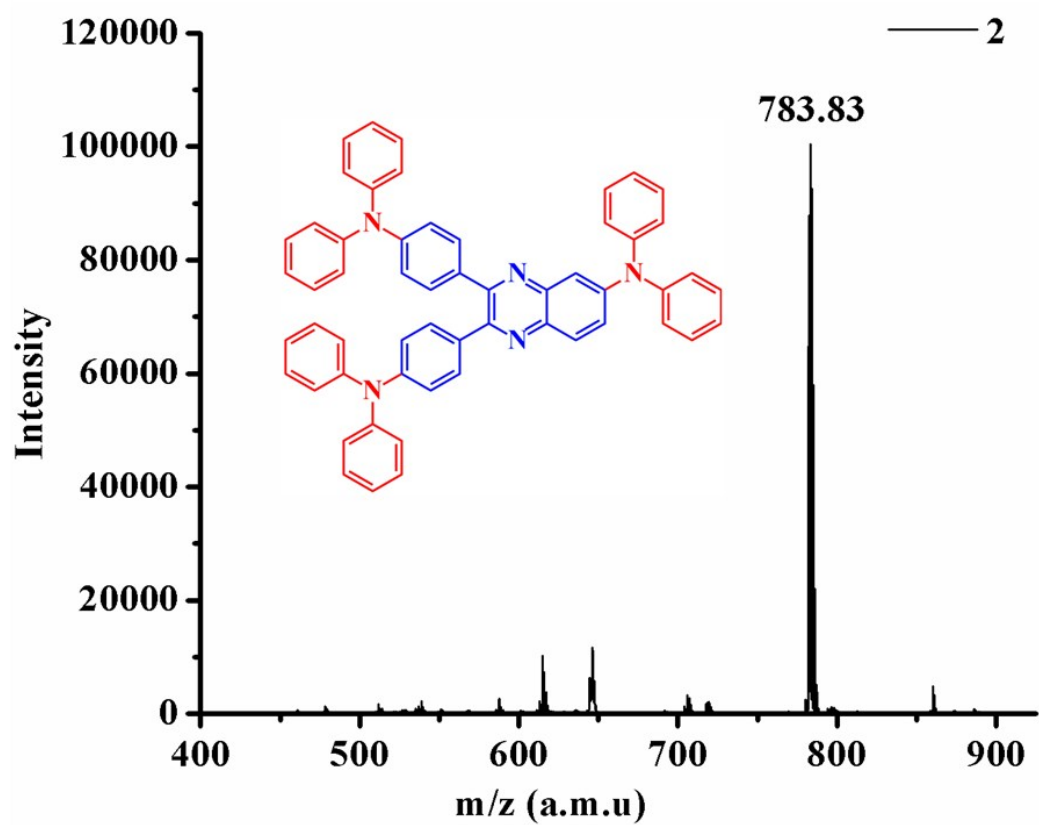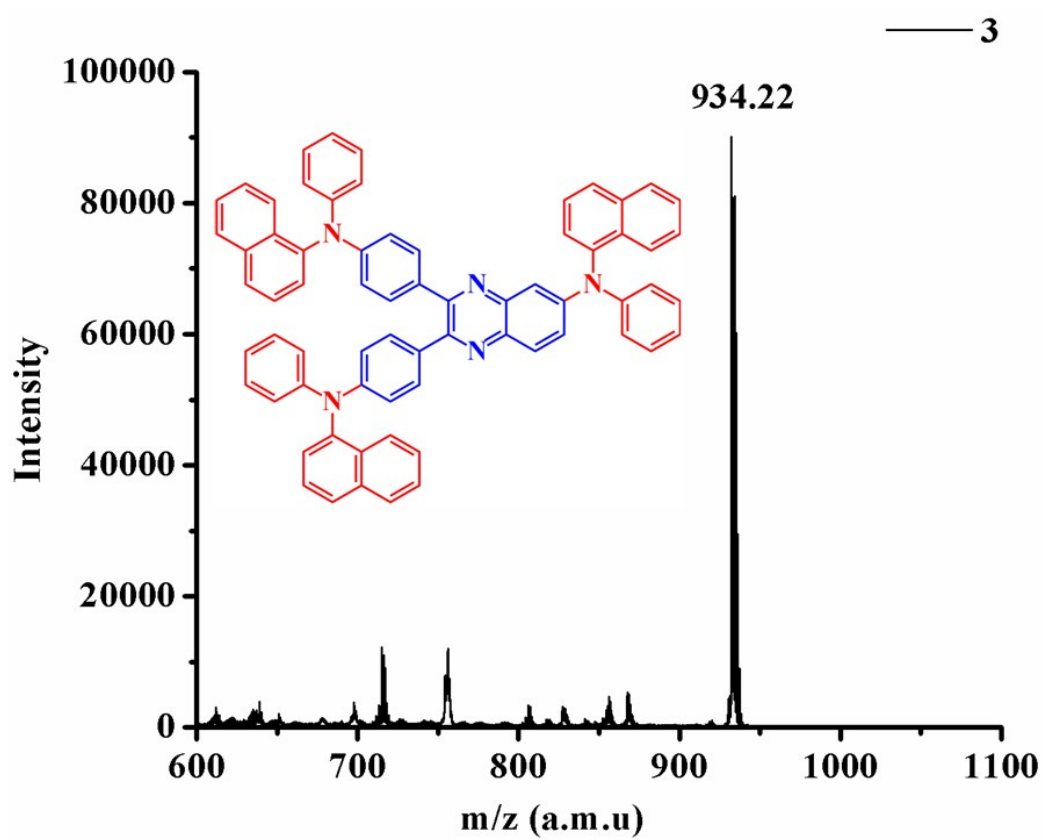

Fig. S11. MALDI-TOF spectrum of compound 2 and 3.

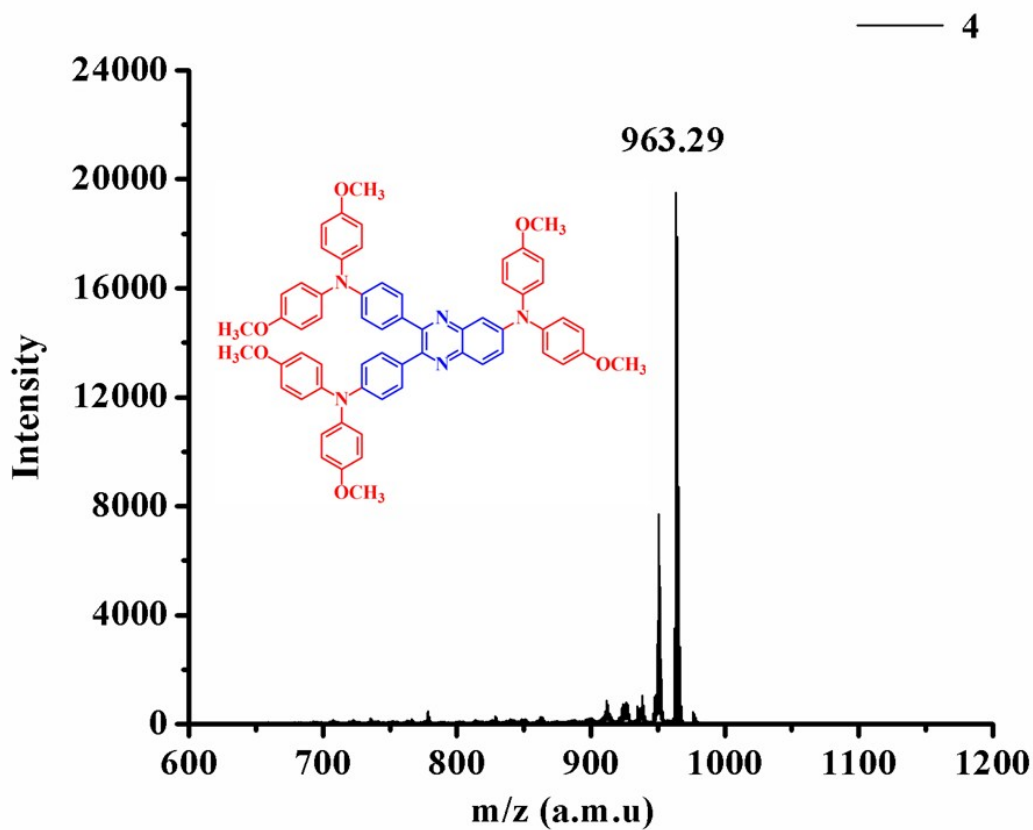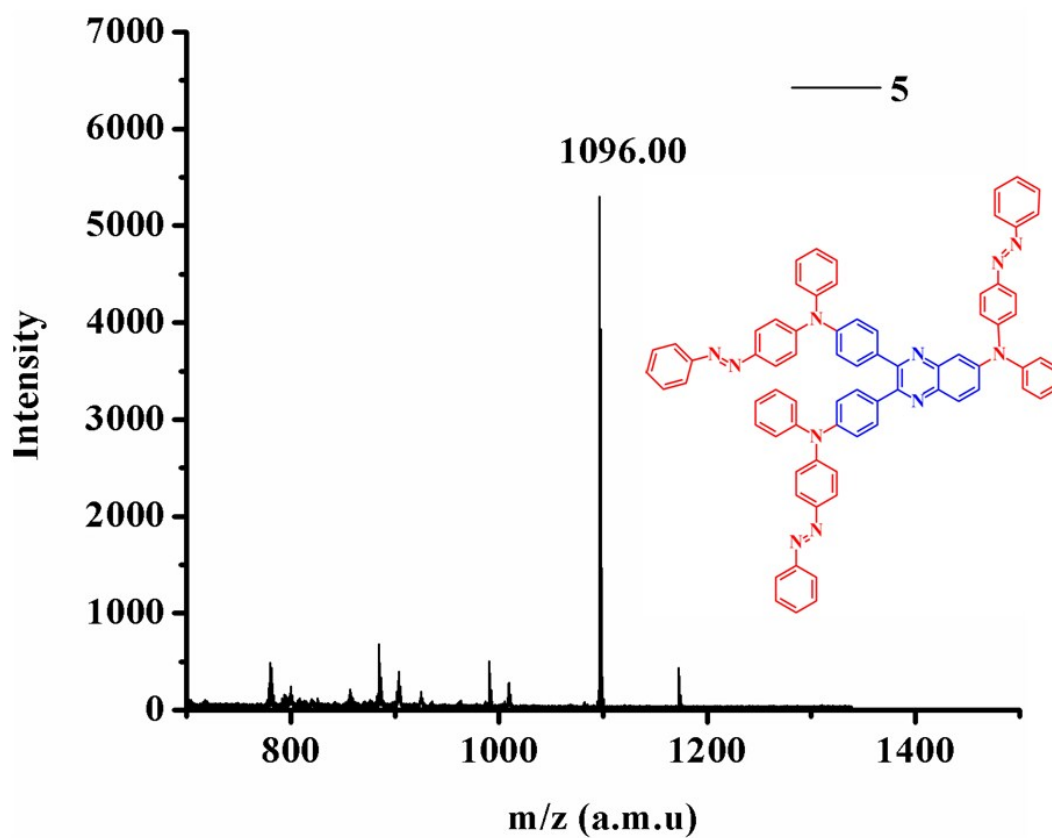

Fig. S12. MALDI-TOF spectrum of compound 4 and 5.

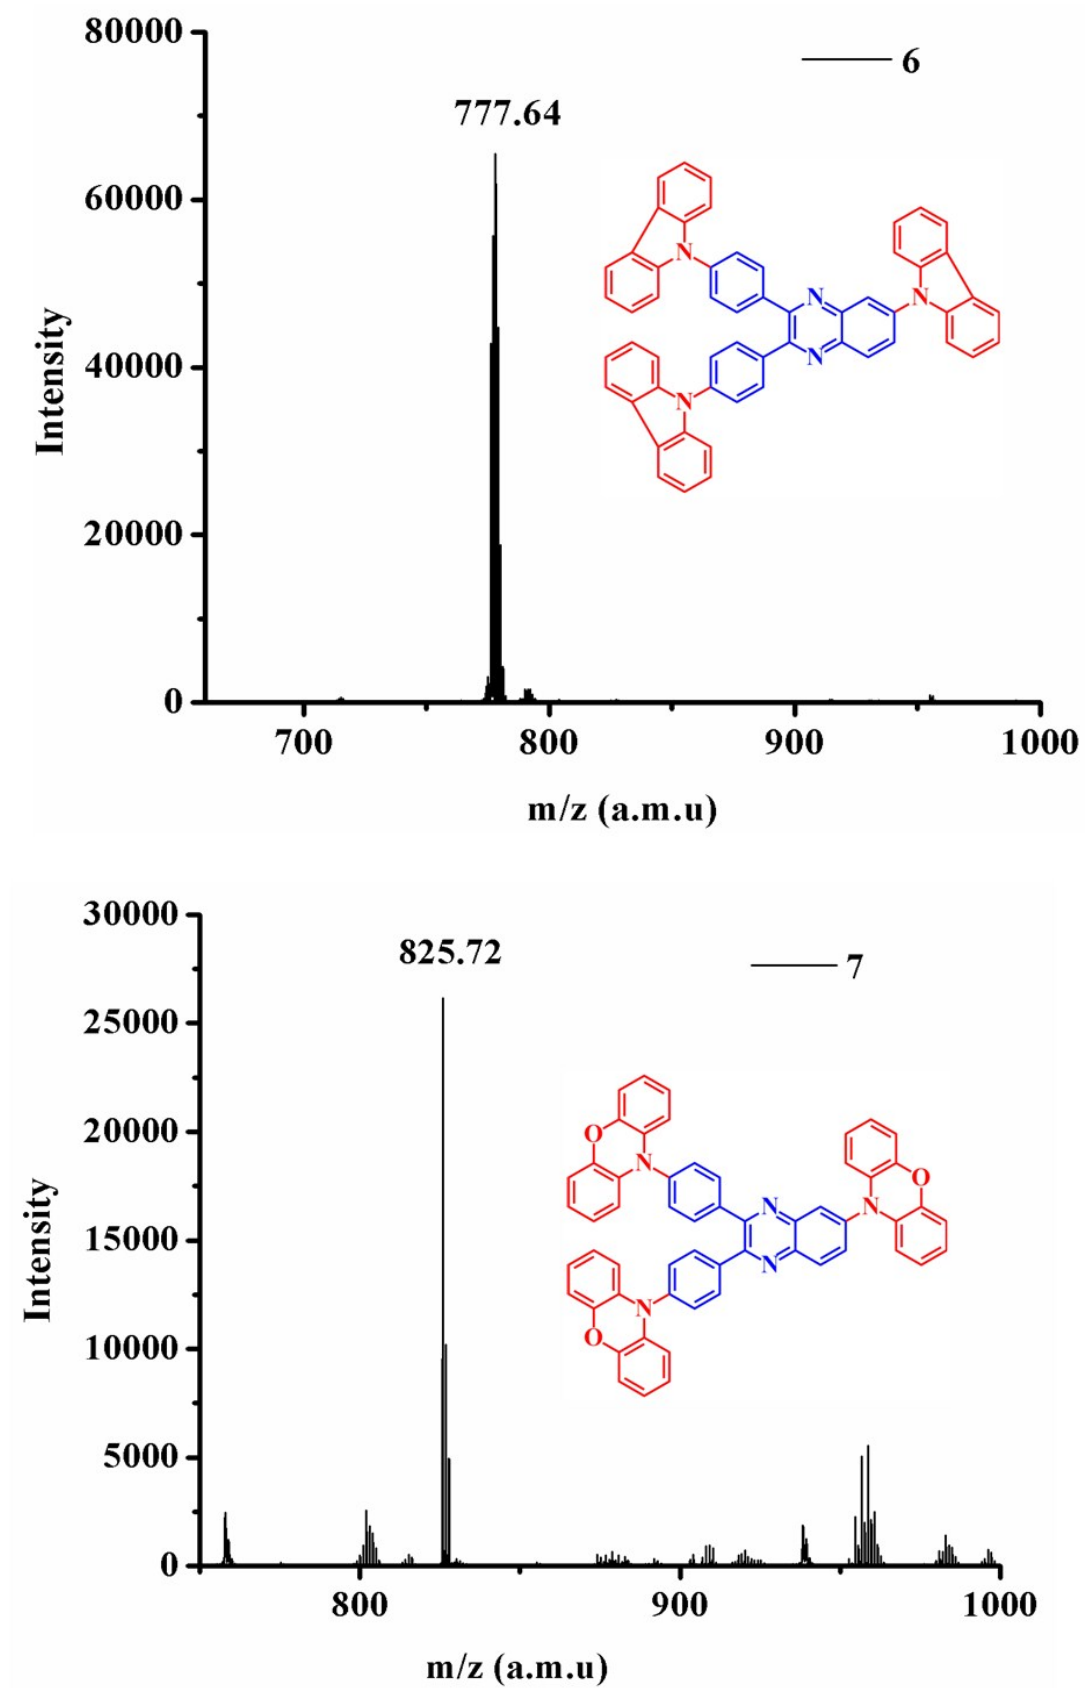

Fig. S13. MALDI-TOF spectrum of compound 6 and 7.



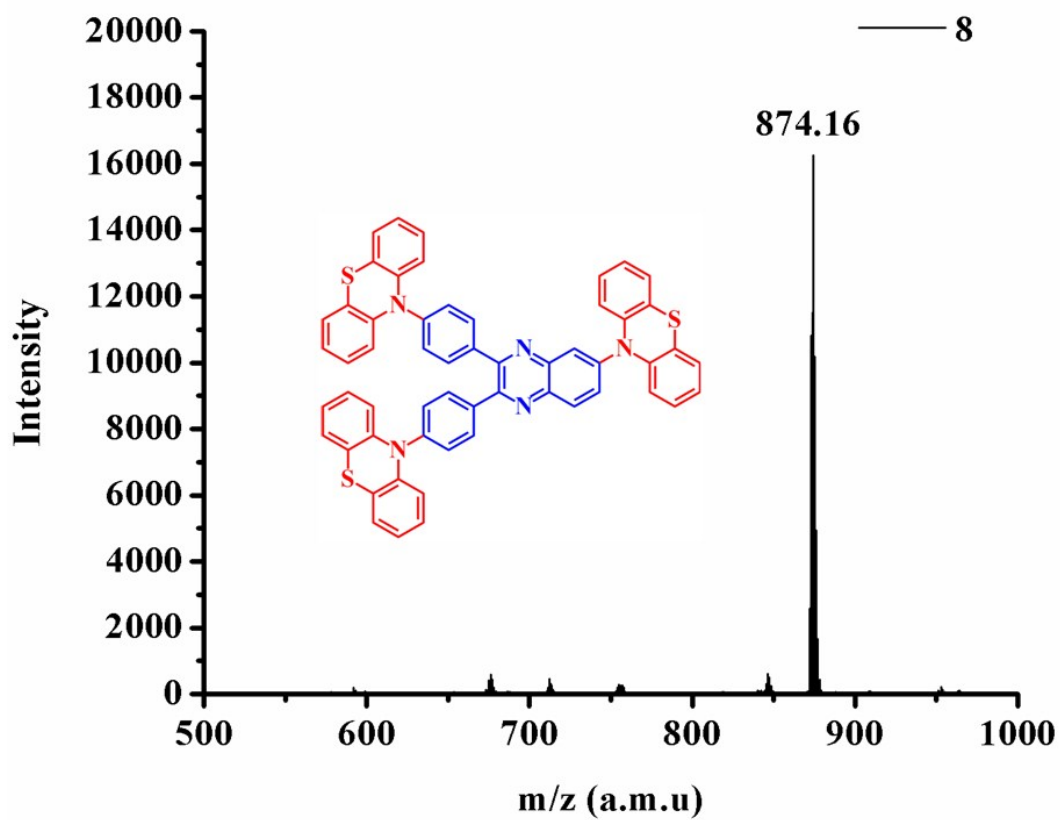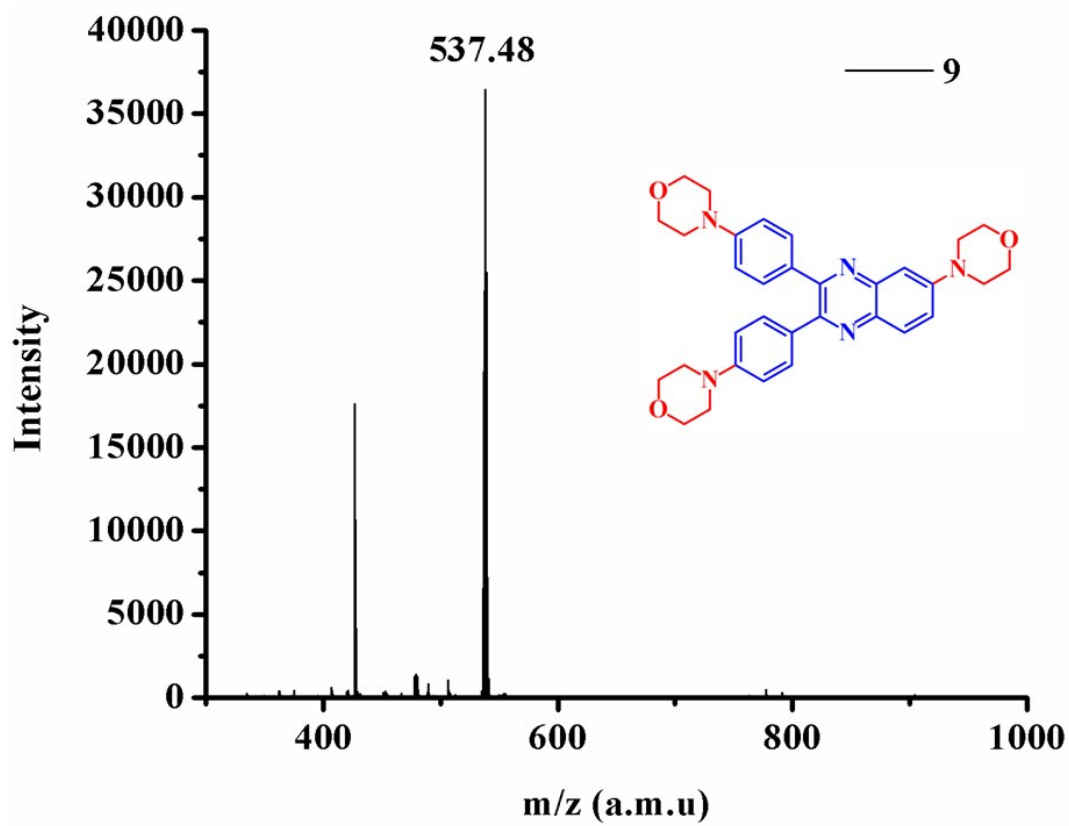

Fig. S14. MALDI-TOF spectrum of compound 8 and 9.

## 8. FT-IR Spectra of compounds 1–9.

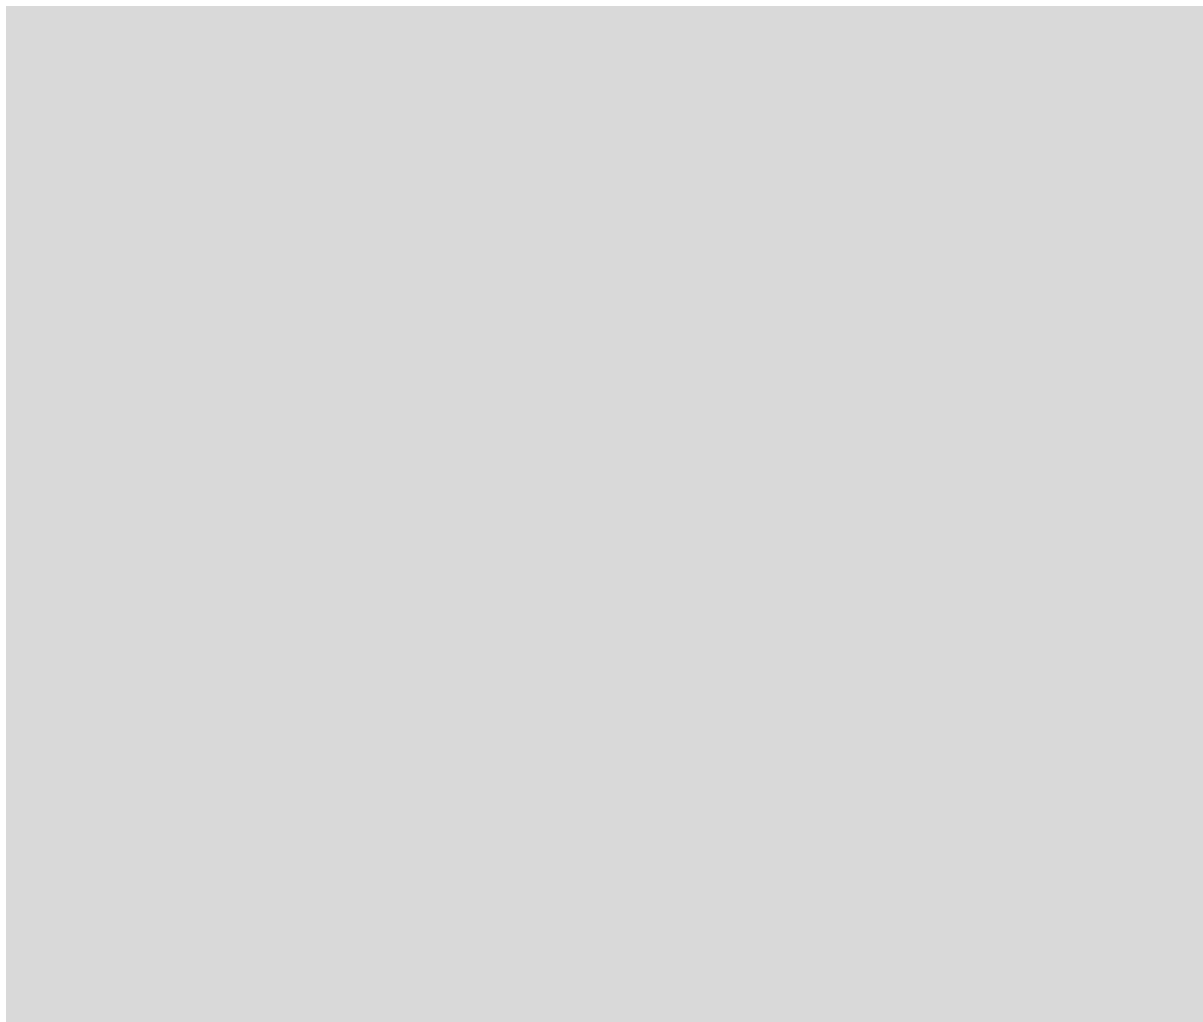

**Fig. S15.** FTIR spectrum of compound **1**.

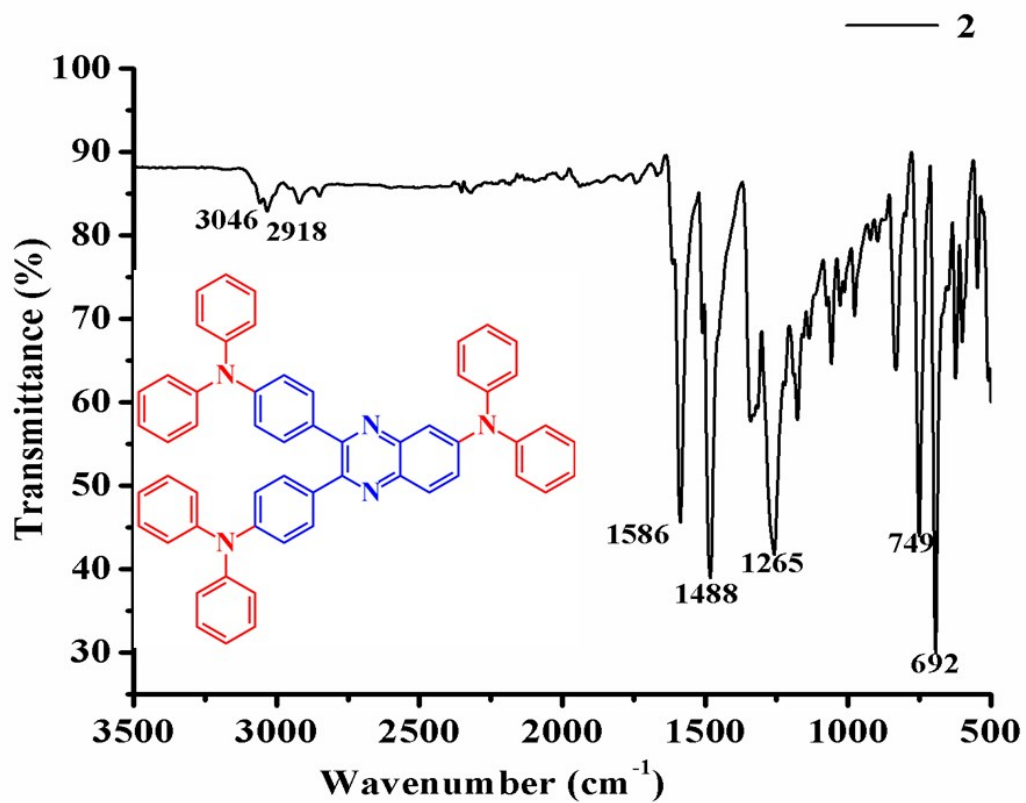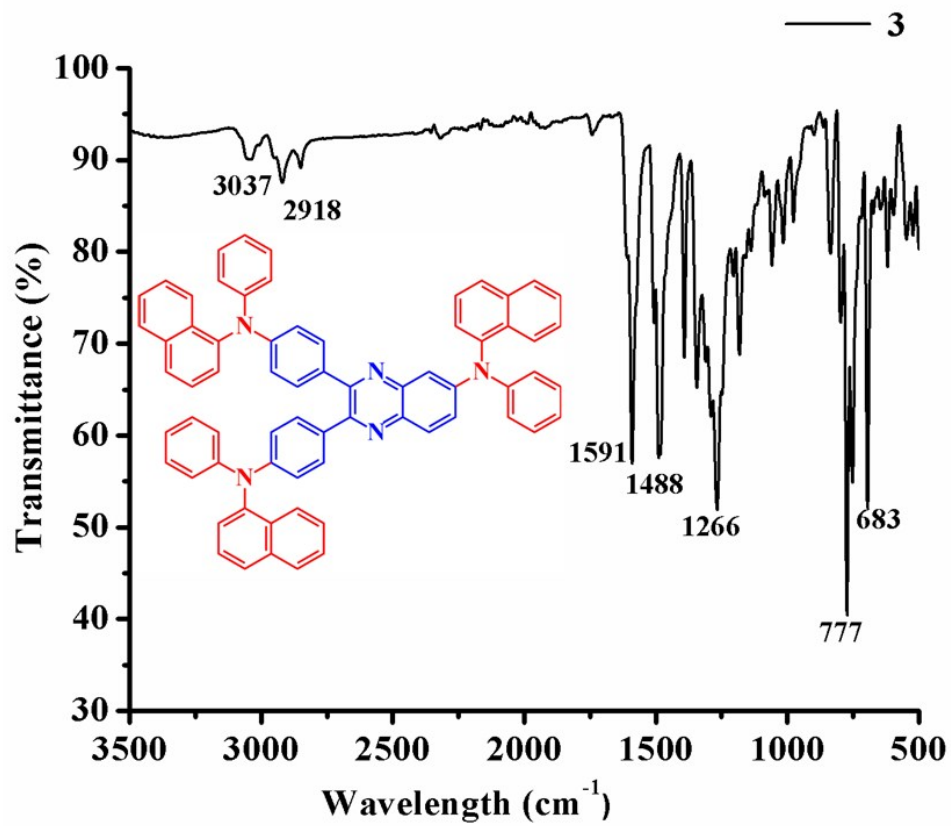

Fig. S16. FTIR spectrum of compound 2 and 3.

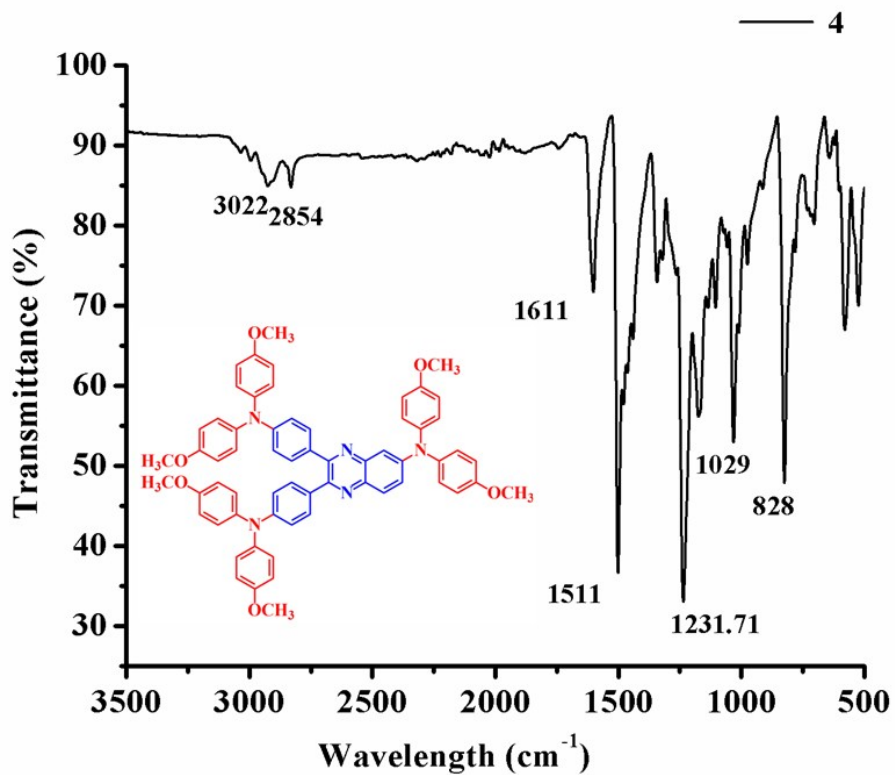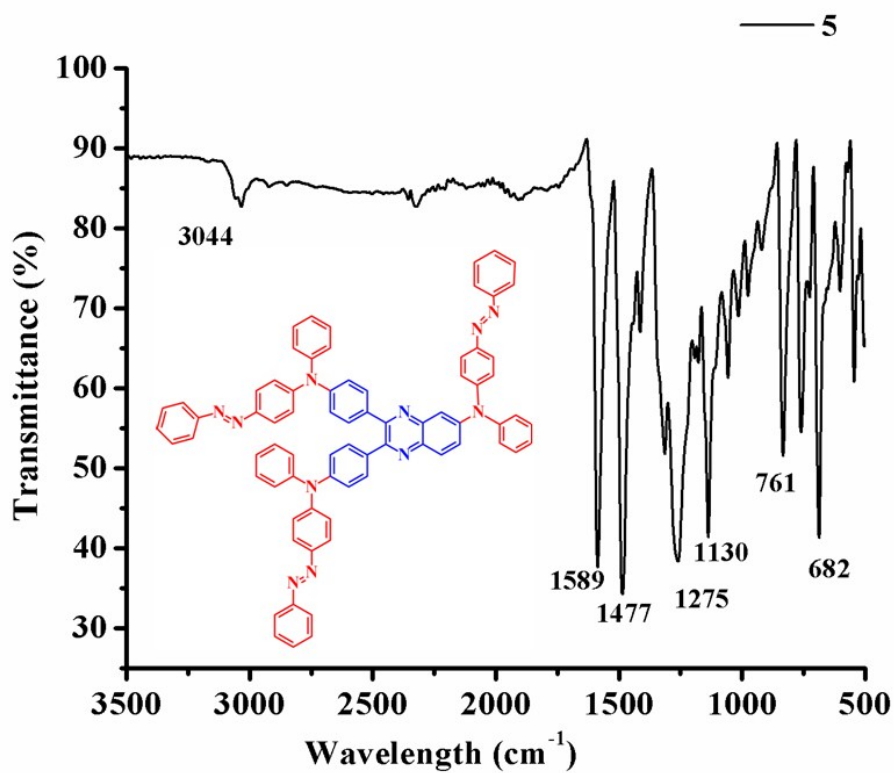

Fig. S17. FTIR spectrum of compound 4 and 5.

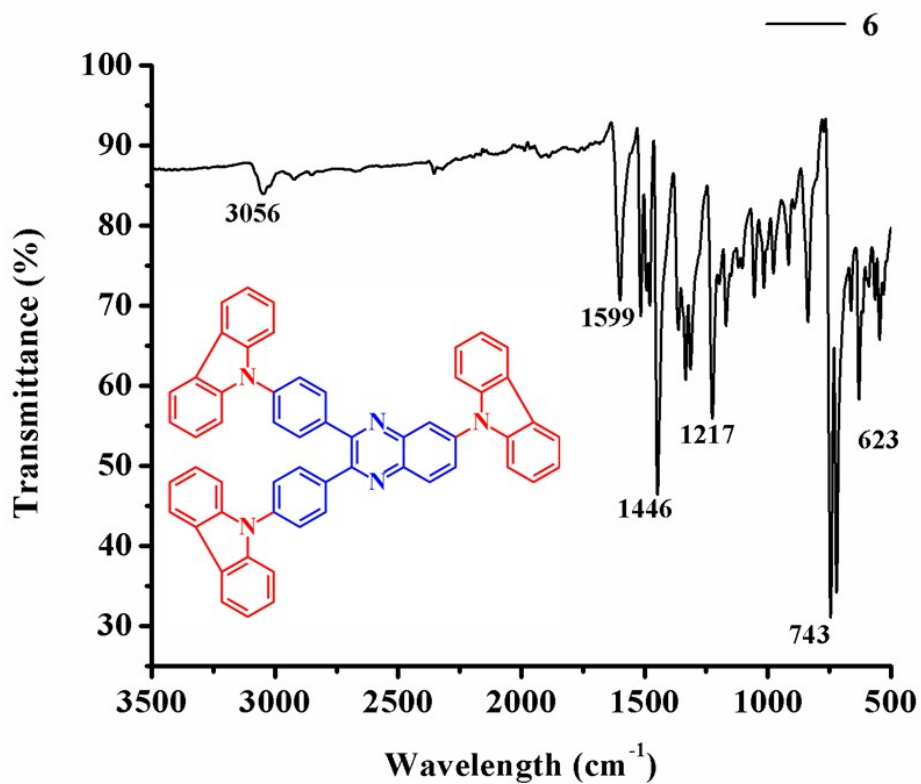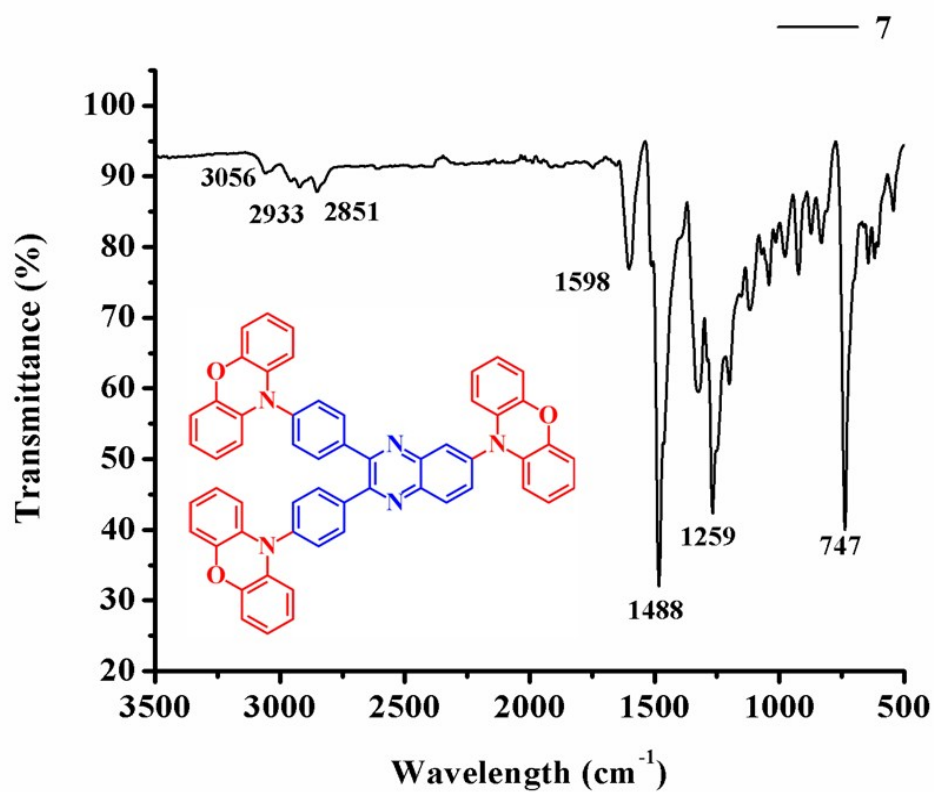

Fig. S18. FTIR spectrum of compound 6 and 7.

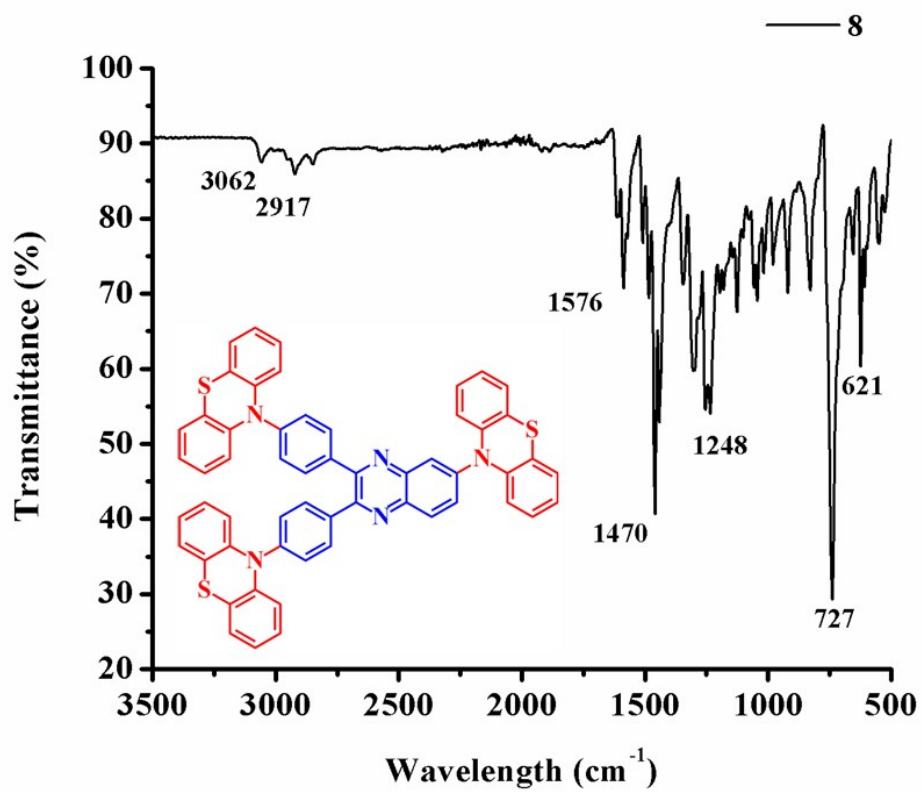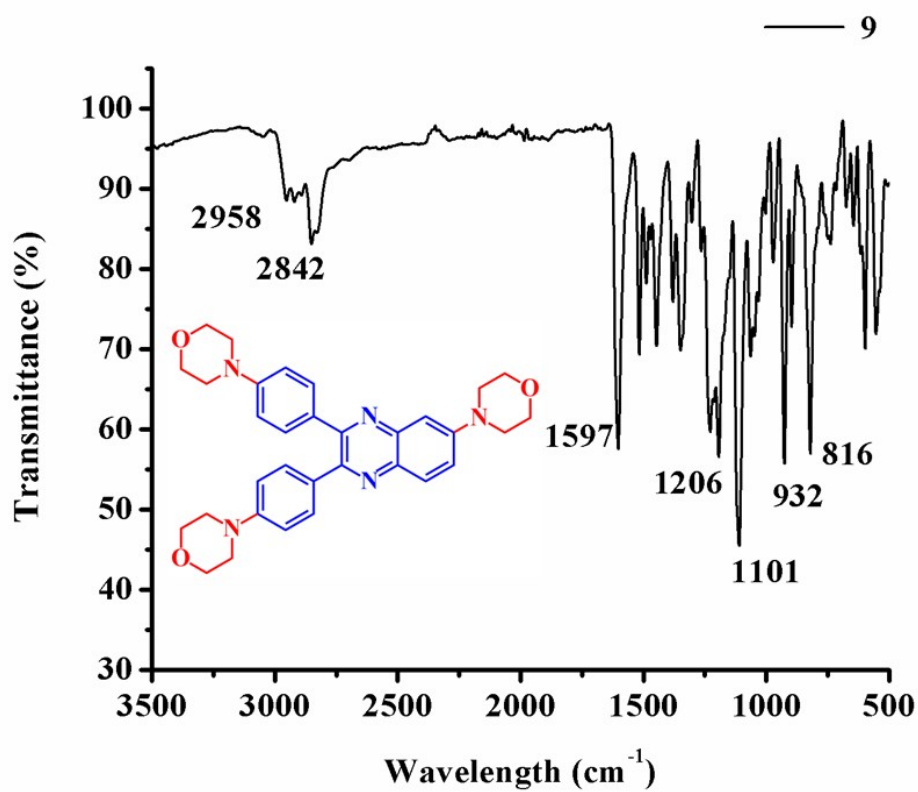

Fig. S19. FTIR spectrum of compound 8 and 9.

## 9. $^1\text{H}$ and $^{13}\text{C}$ NMR spectra of compounds 1-9.

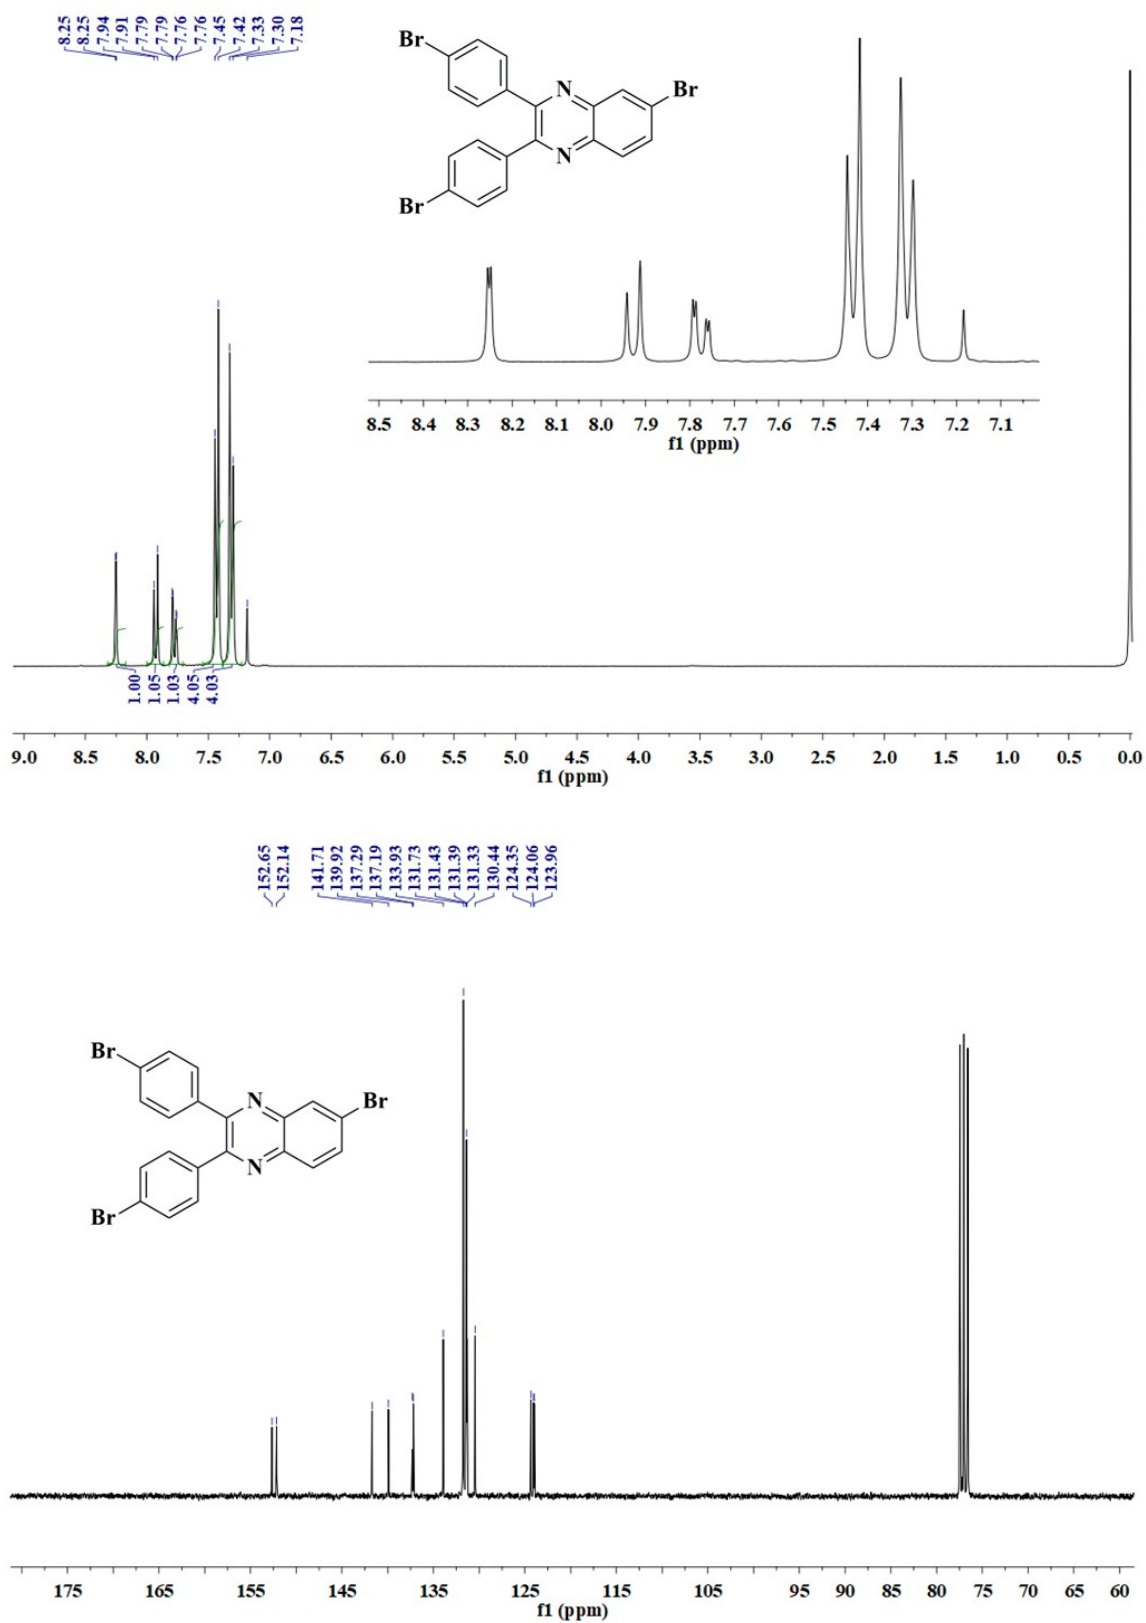

Fig. S20.  $^1\text{H}$  (above) and  $^{13}\text{C}$  (below) NMR spectrum of compound 1.

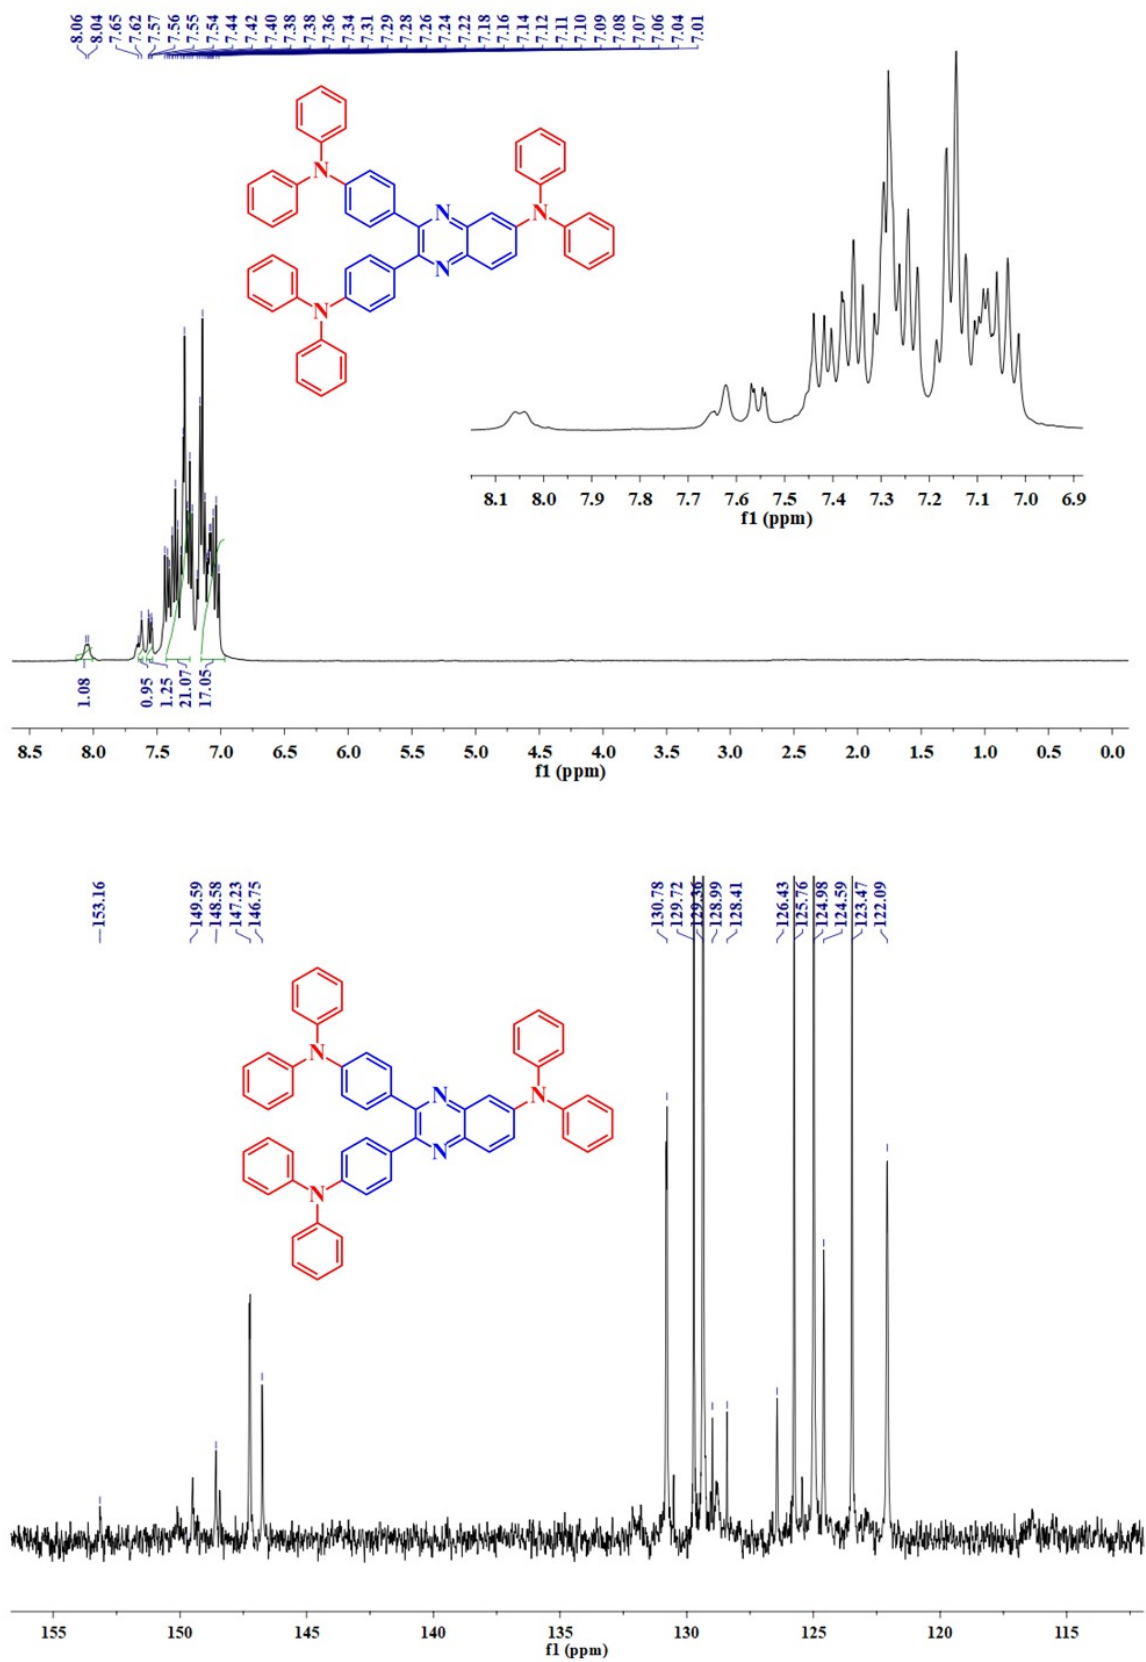

Fig. S21.  $^1\text{H}$  and (above) and  $^{13}\text{C}$  (below) NMR spectrum of compound 2.



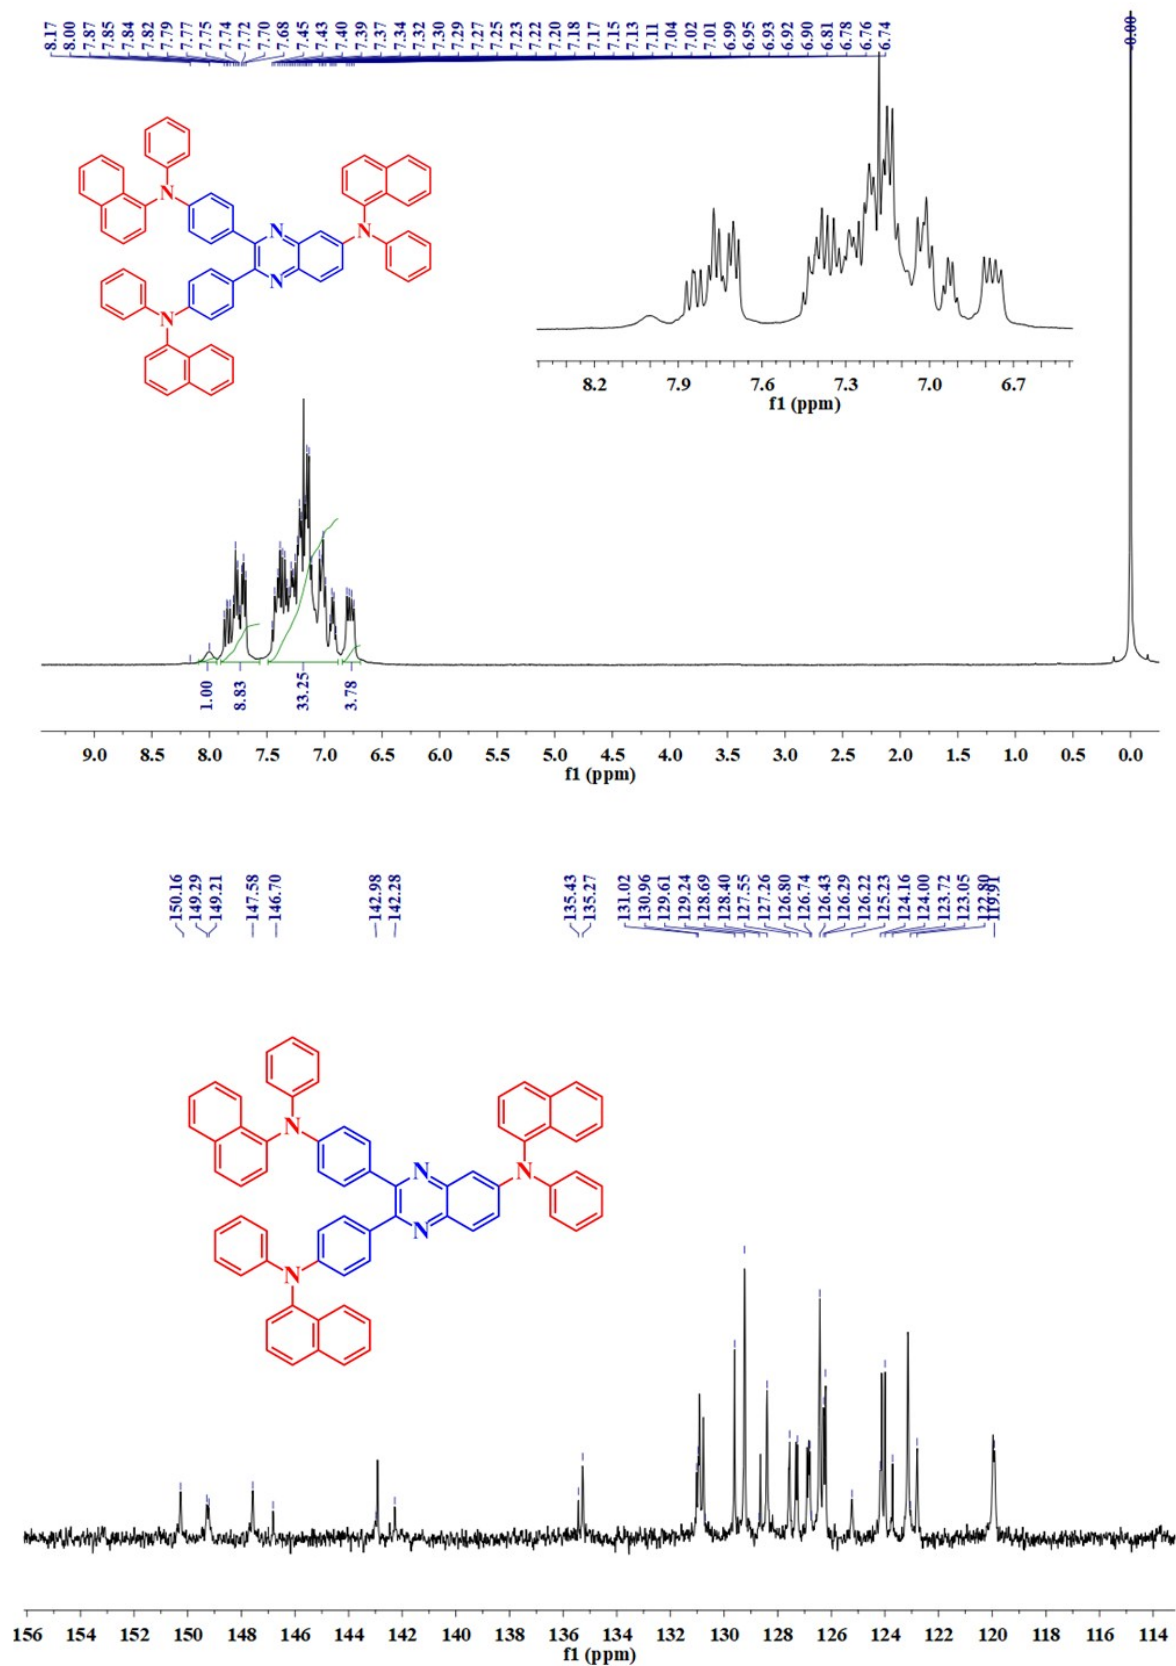

Fig. S22. <sup>1</sup>H (above) and <sup>13</sup>C (below) NMR spectrum of compound 3.

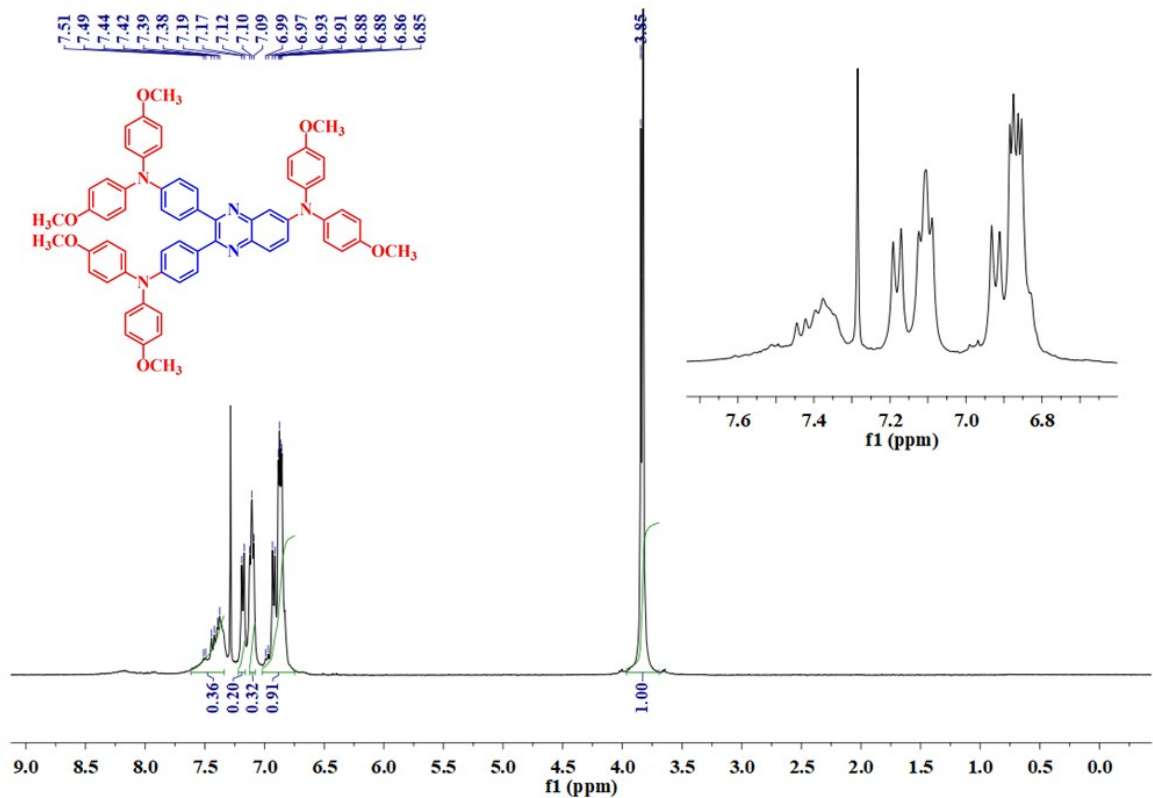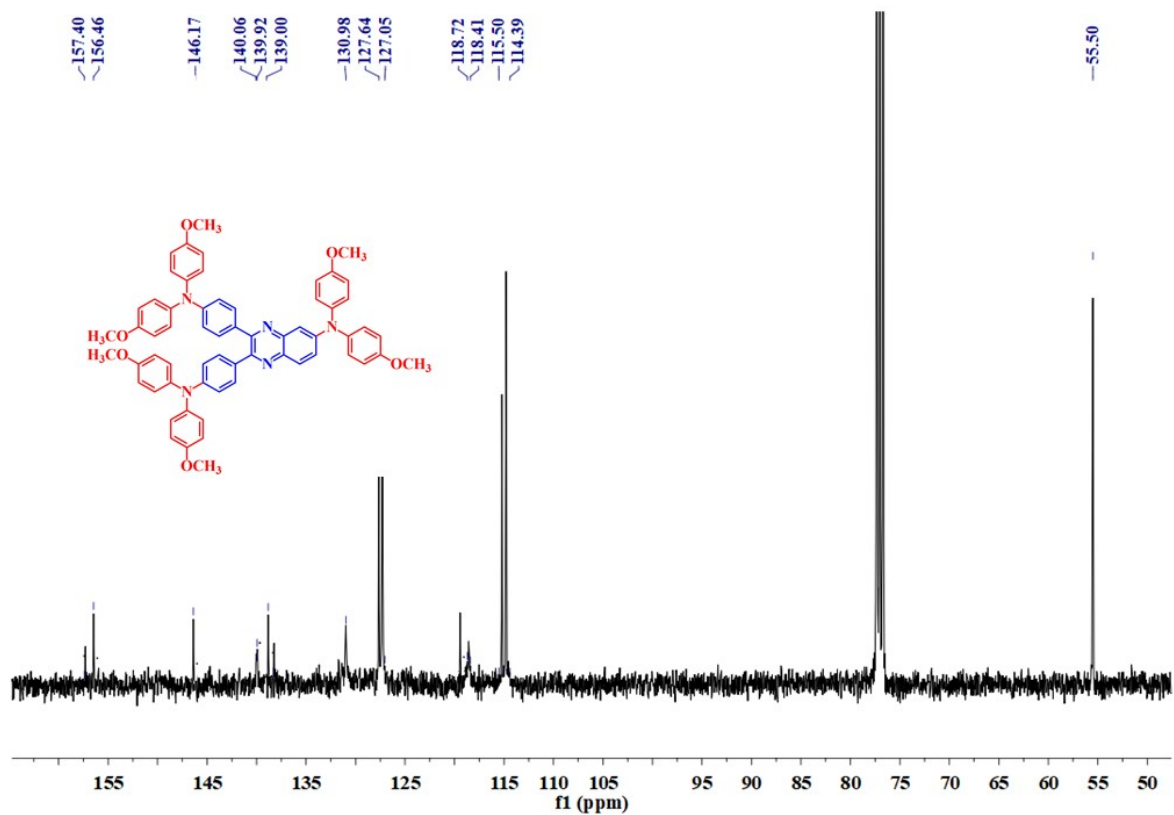

Fig. S23. <sup>1</sup>H (above) and <sup>13</sup>C (below) NMR spectrum of compound 4.

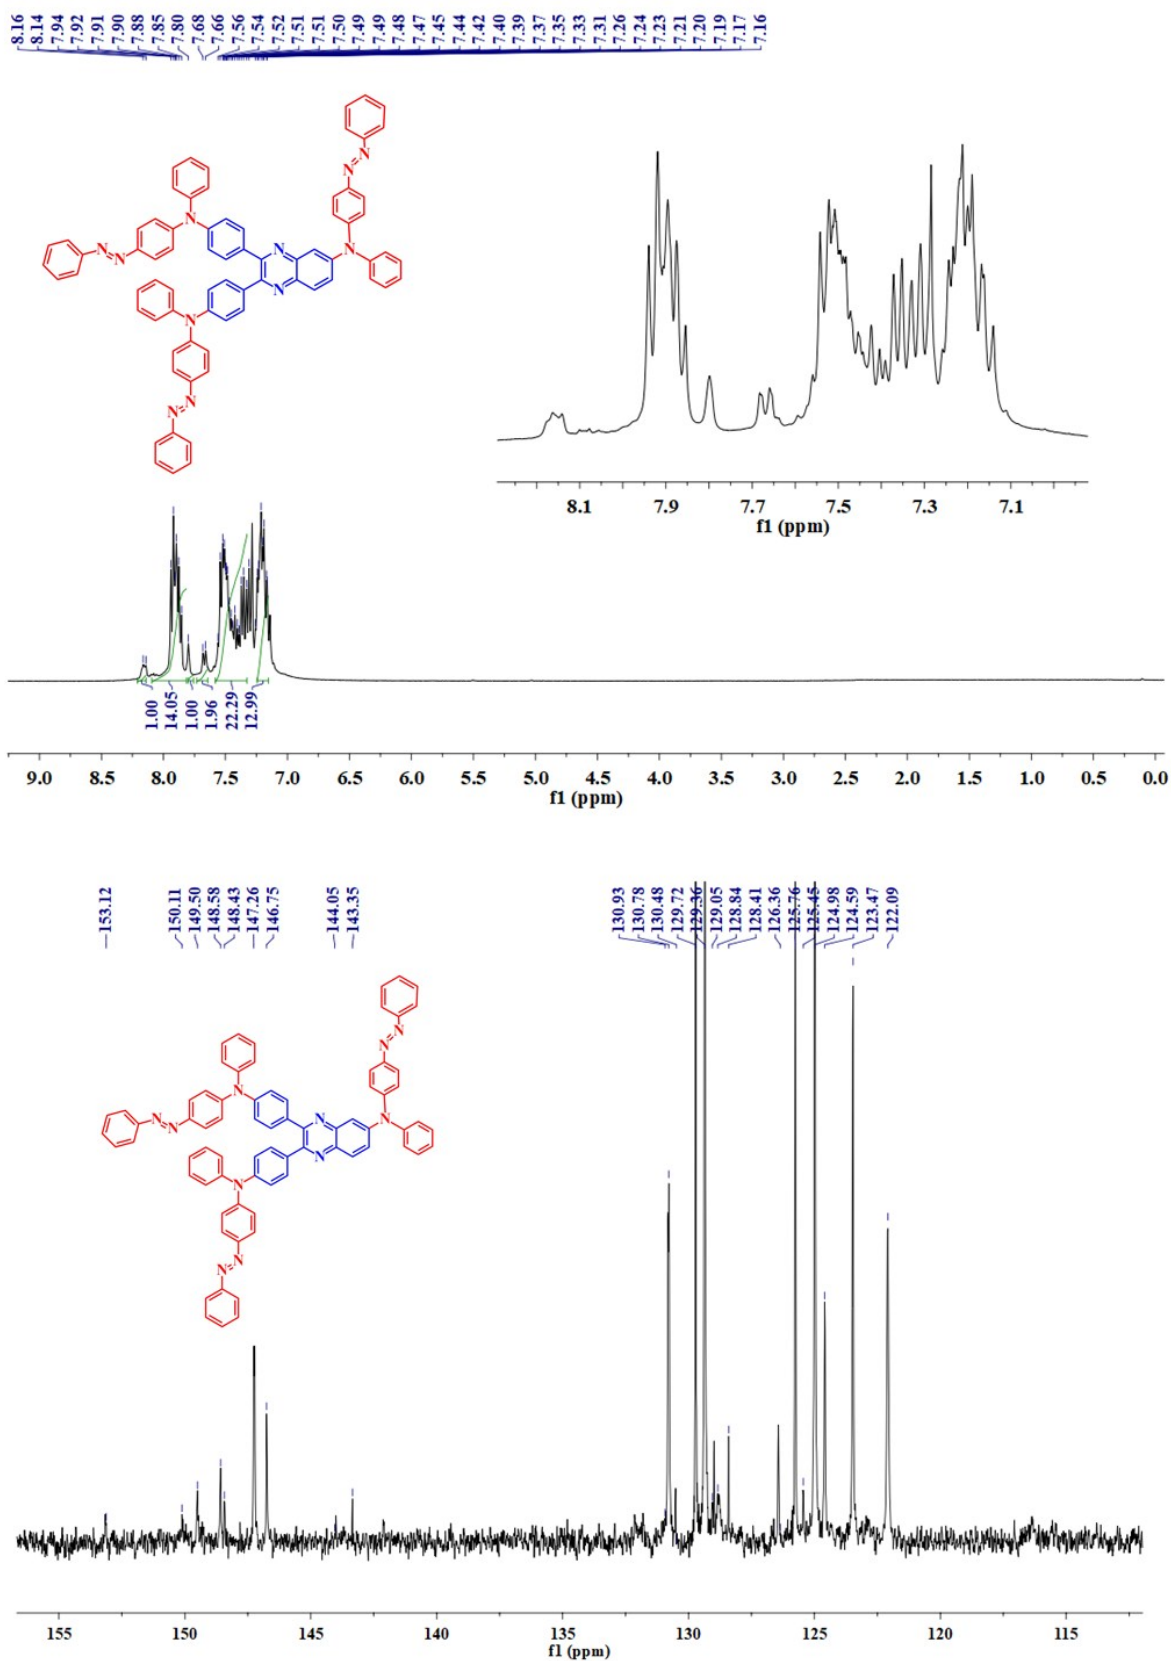

Fig. S24.  $^1\text{H}$  (above) and  $^{13}\text{C}$  (below) NMR spectrum of compound 5.

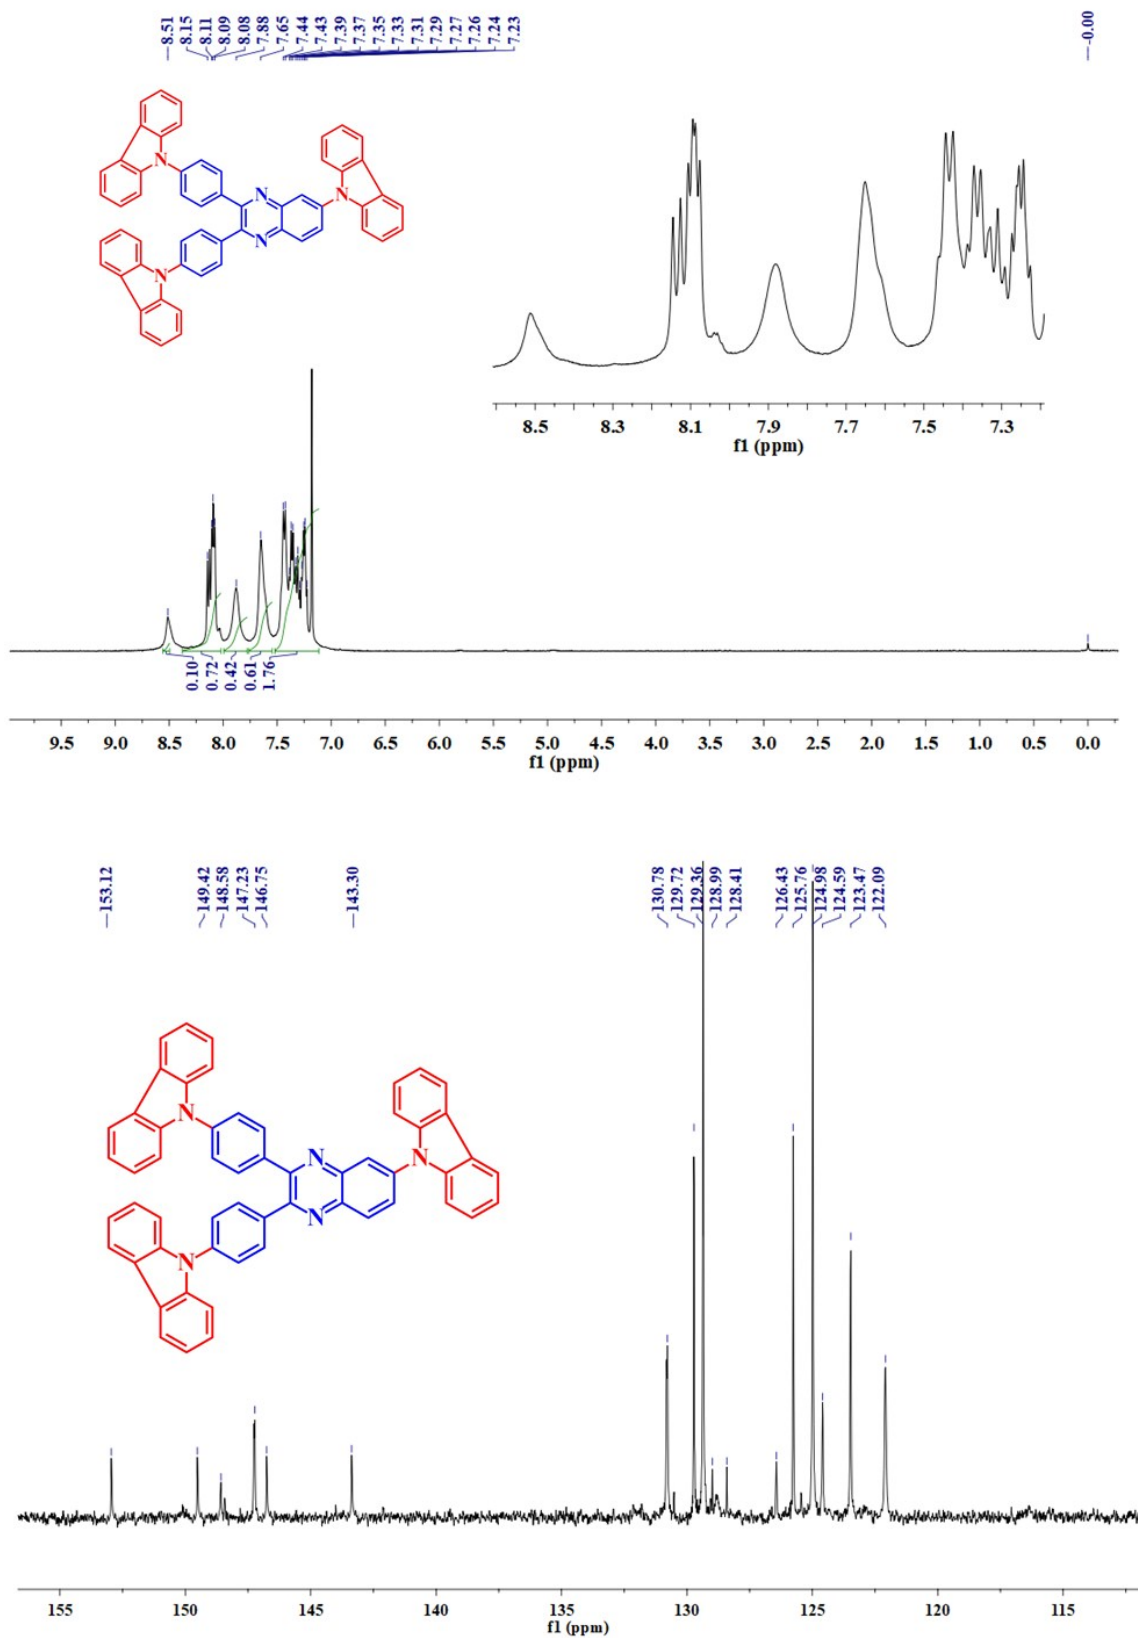

Fig. S25.  $^1\text{H}$  (above) and  $^{13}\text{C}$  (below) NMR spectrum of compound 6.

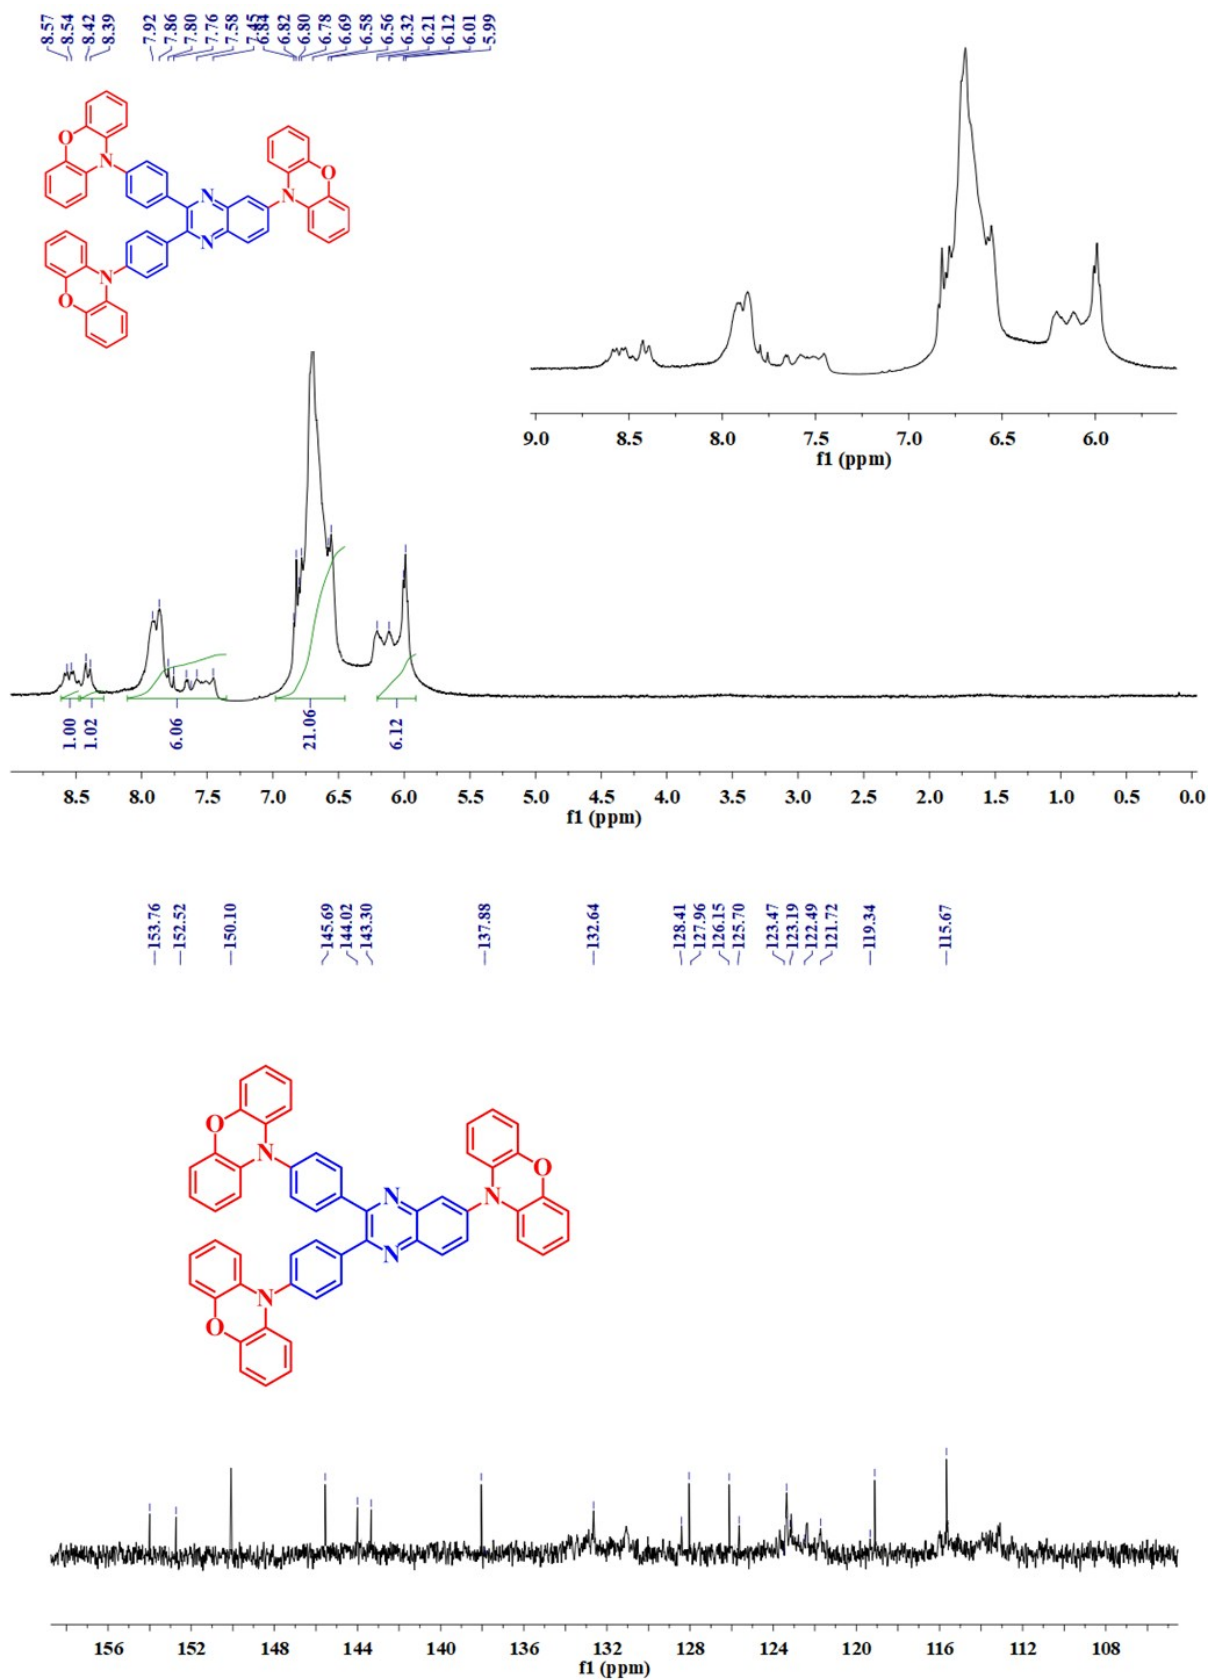

**Fig. S26.** <sup>1</sup>H (above) and <sup>13</sup>C (below) NMR spectrum of compound **7**.

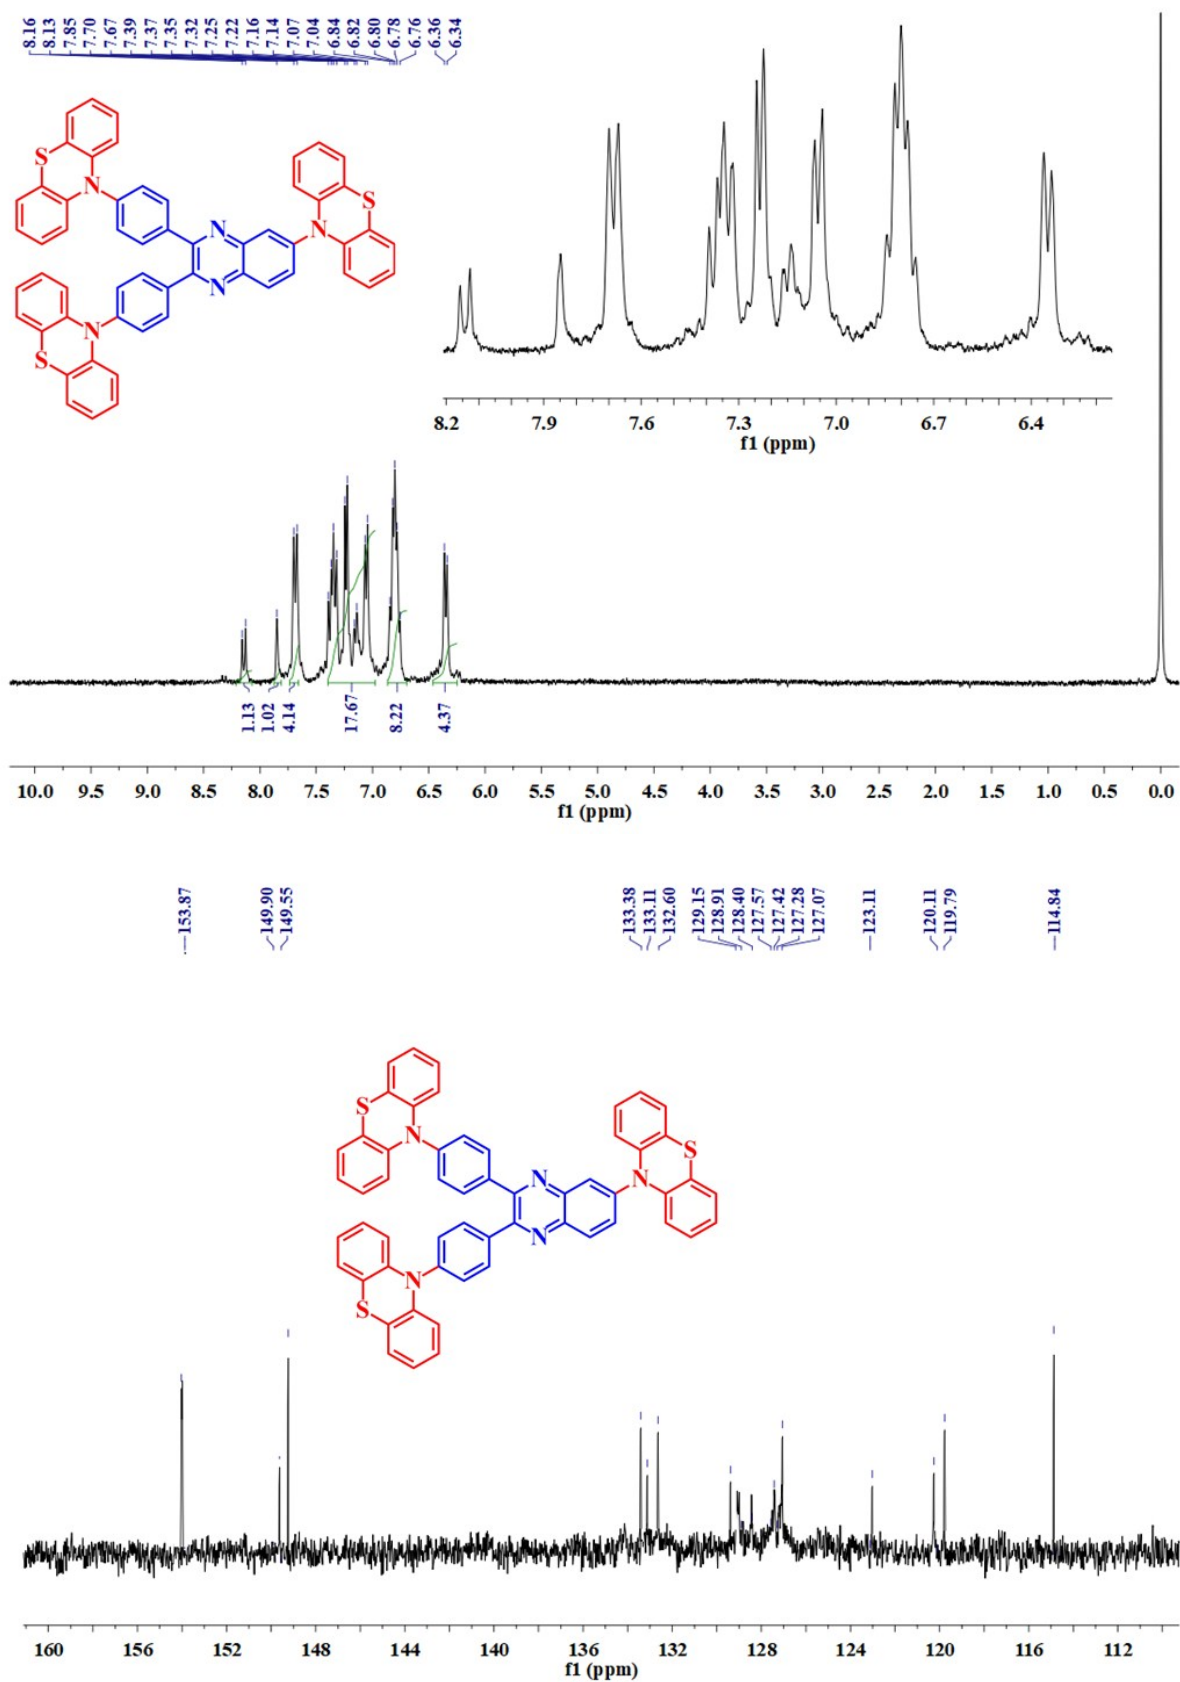

Fig. S27. <sup>1</sup>H (above) and <sup>13</sup>C (below) NMR spectrum of compound **8**.

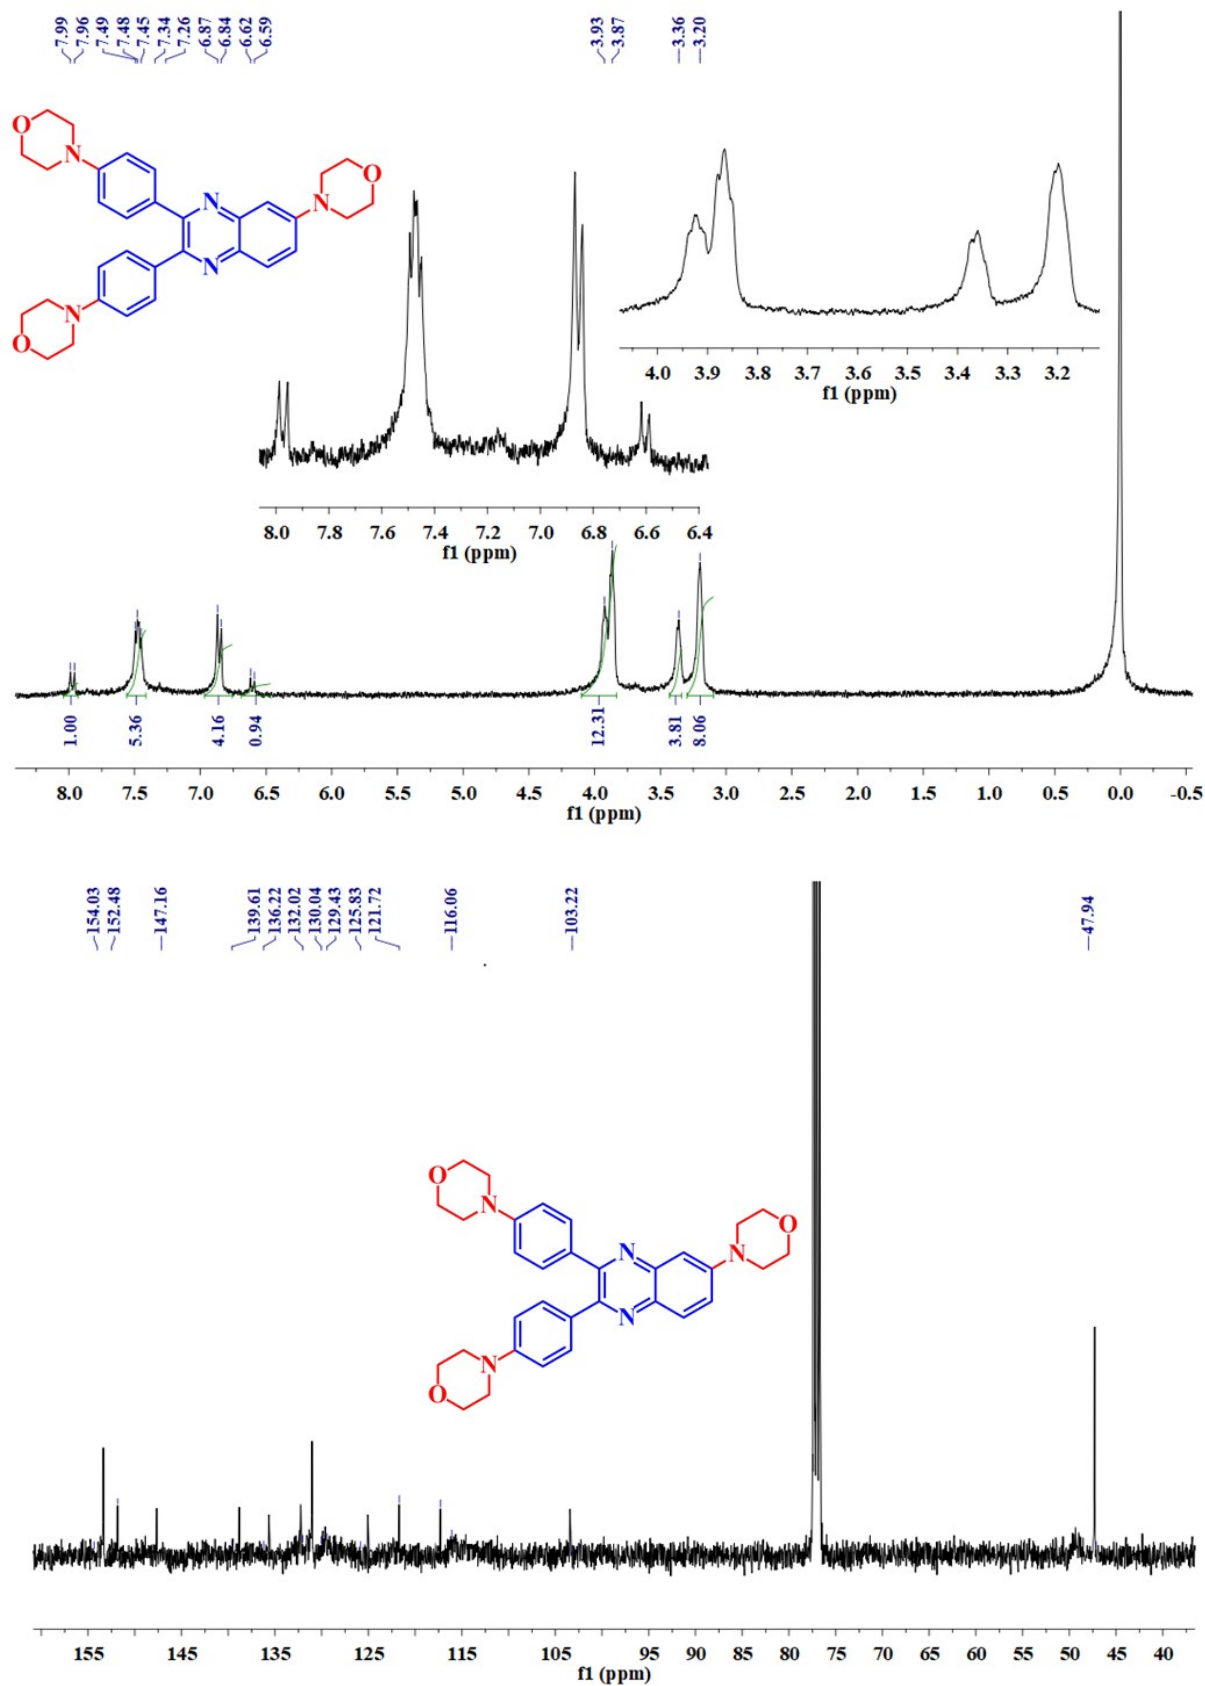

Fig. S28.  $^1\text{H}$  (above) and  $^{13}\text{C}$  (below) NMR spectrum of compound 9.

10. Optimized structures of compounds 1-9.

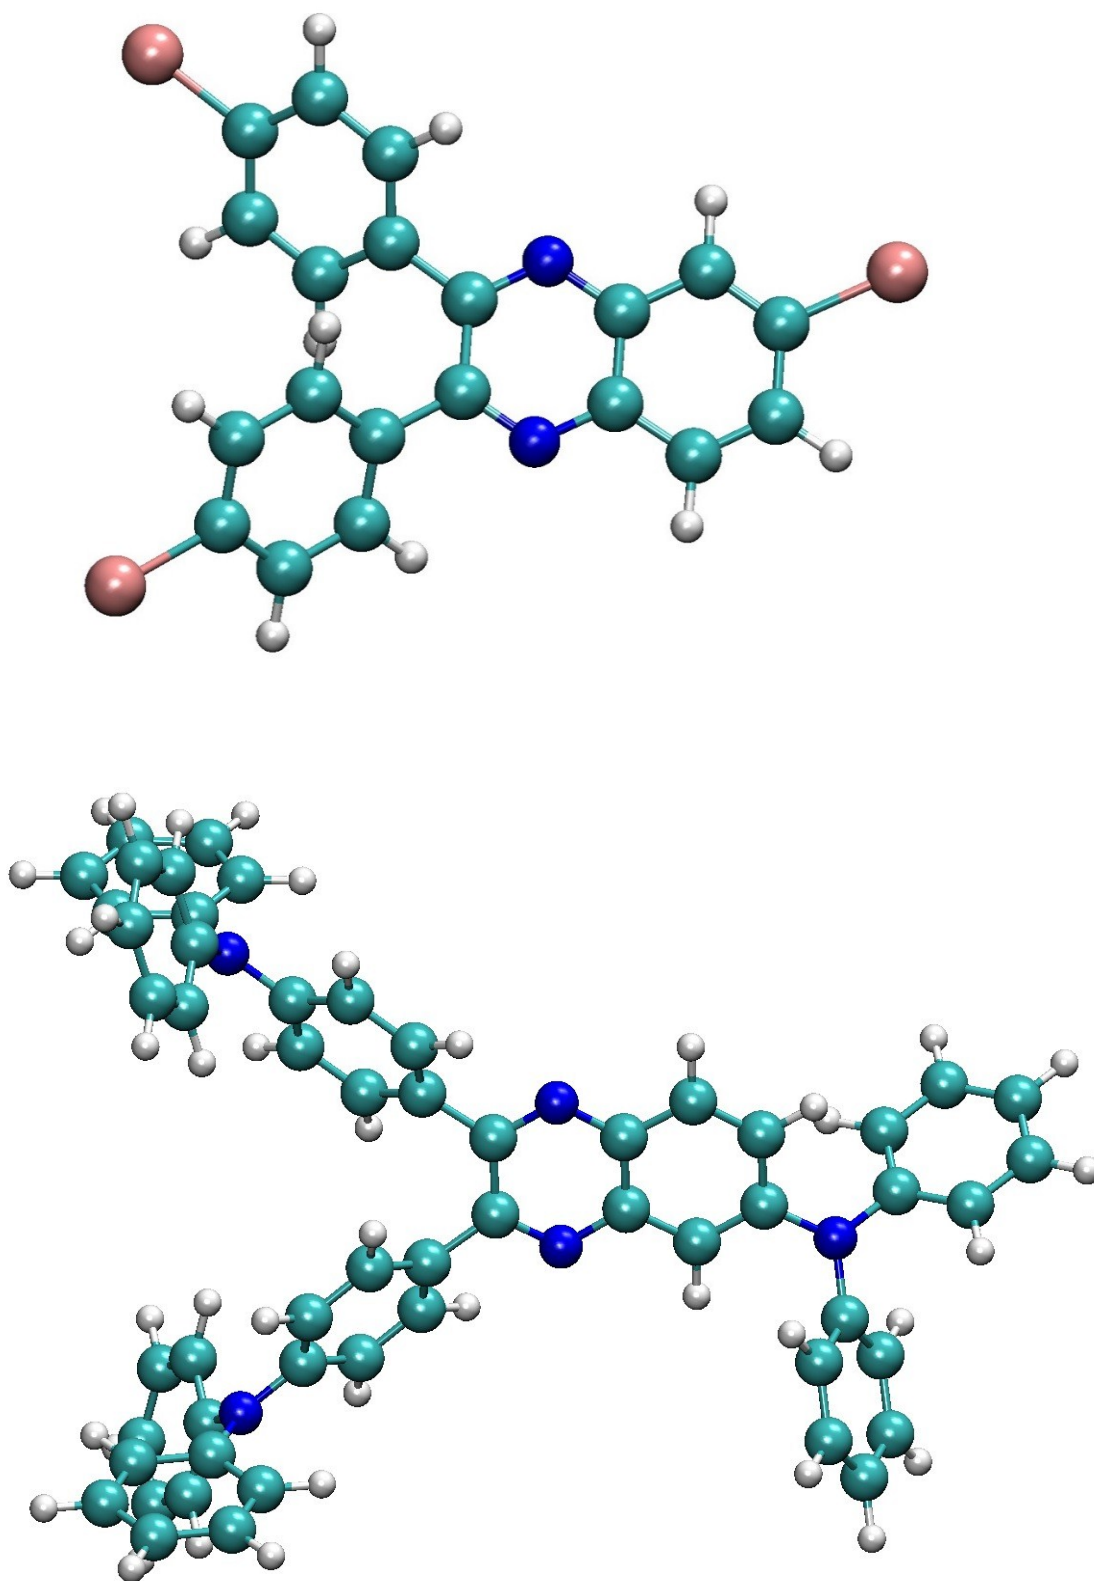

Fig. S29. Optimized structure of 1 (above) and 2 (below).



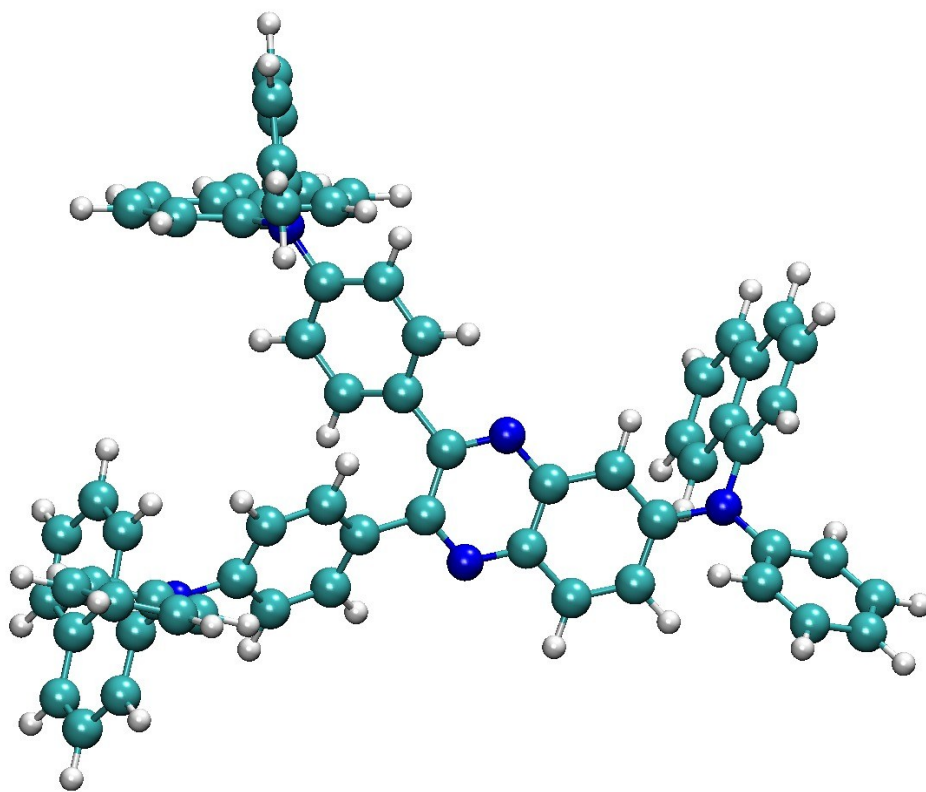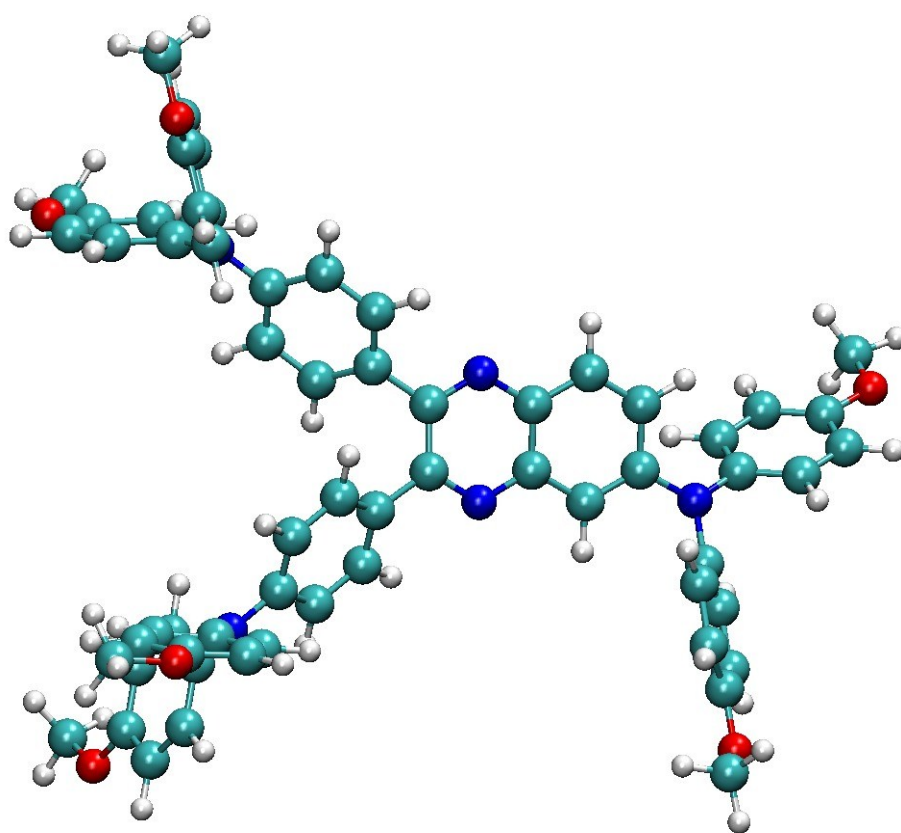

**Fig. S30.** Optimized structure of **3** (above) and **4** (below).

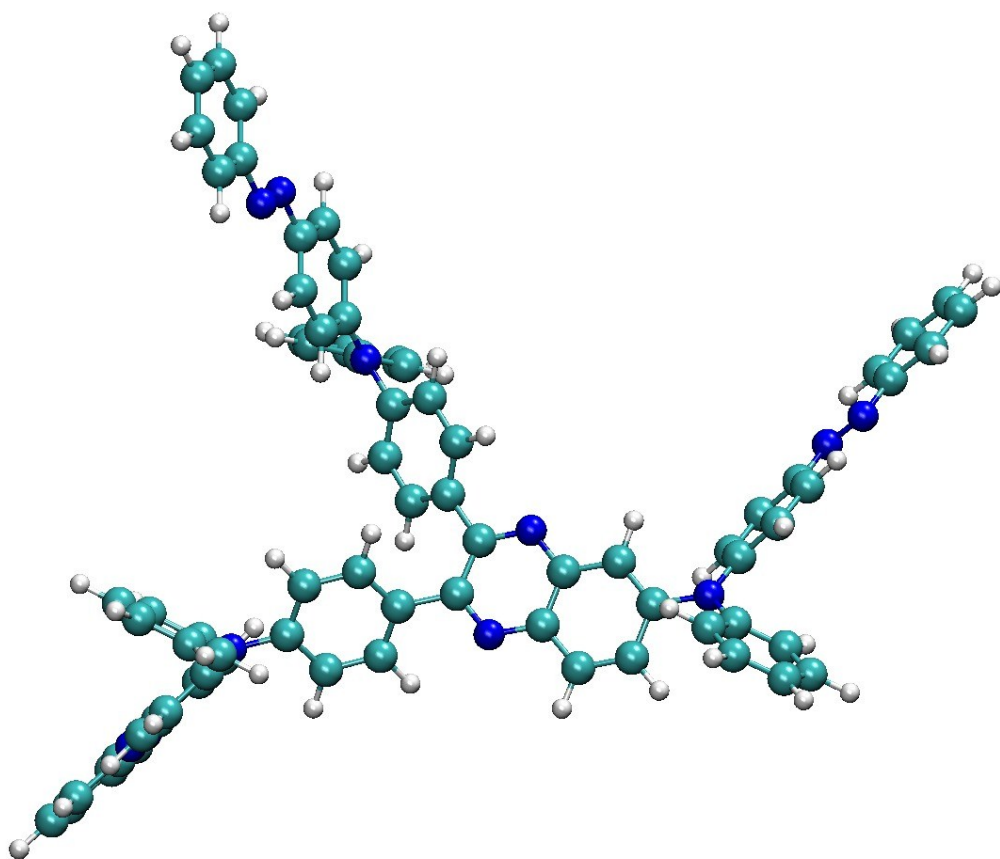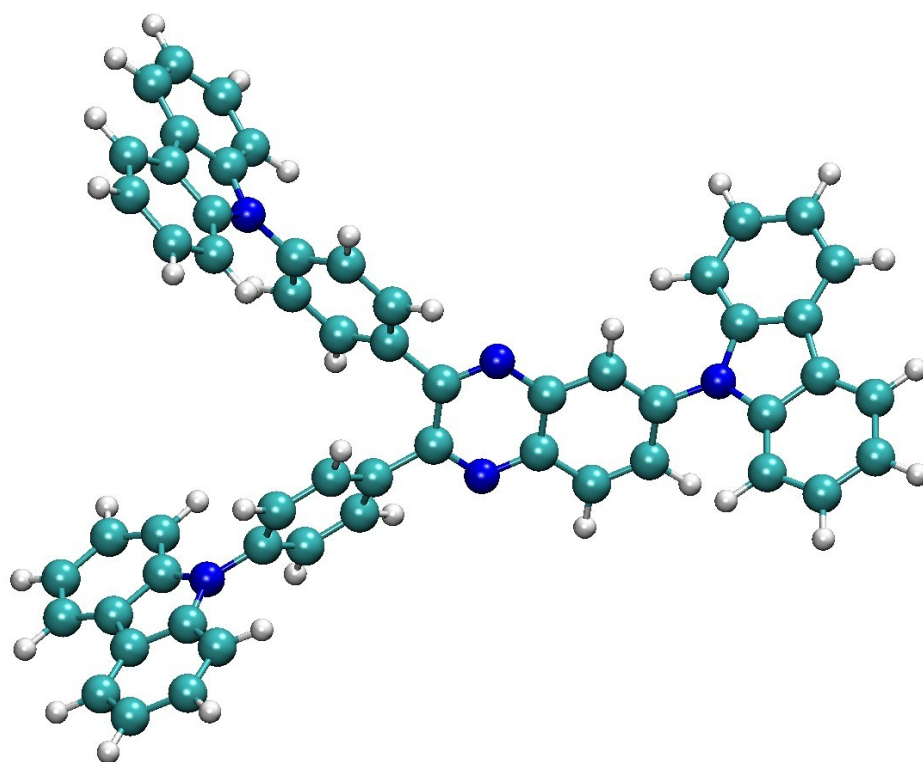

**Fig. S31.** Optimized structure of **5** (above) and **6** (below).

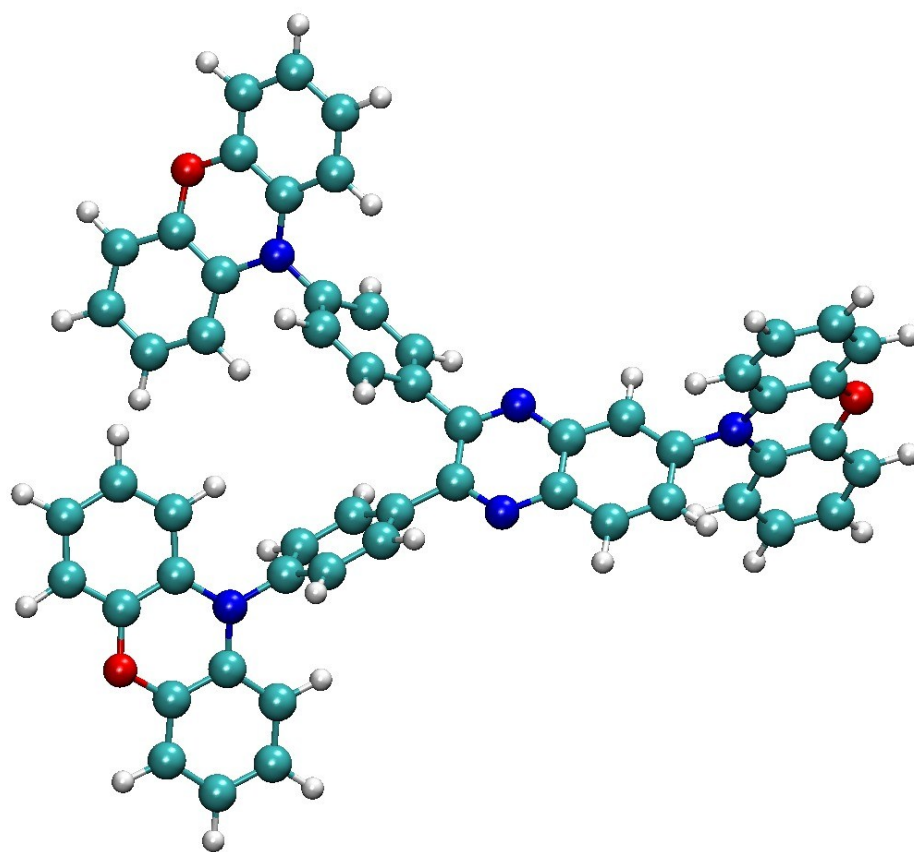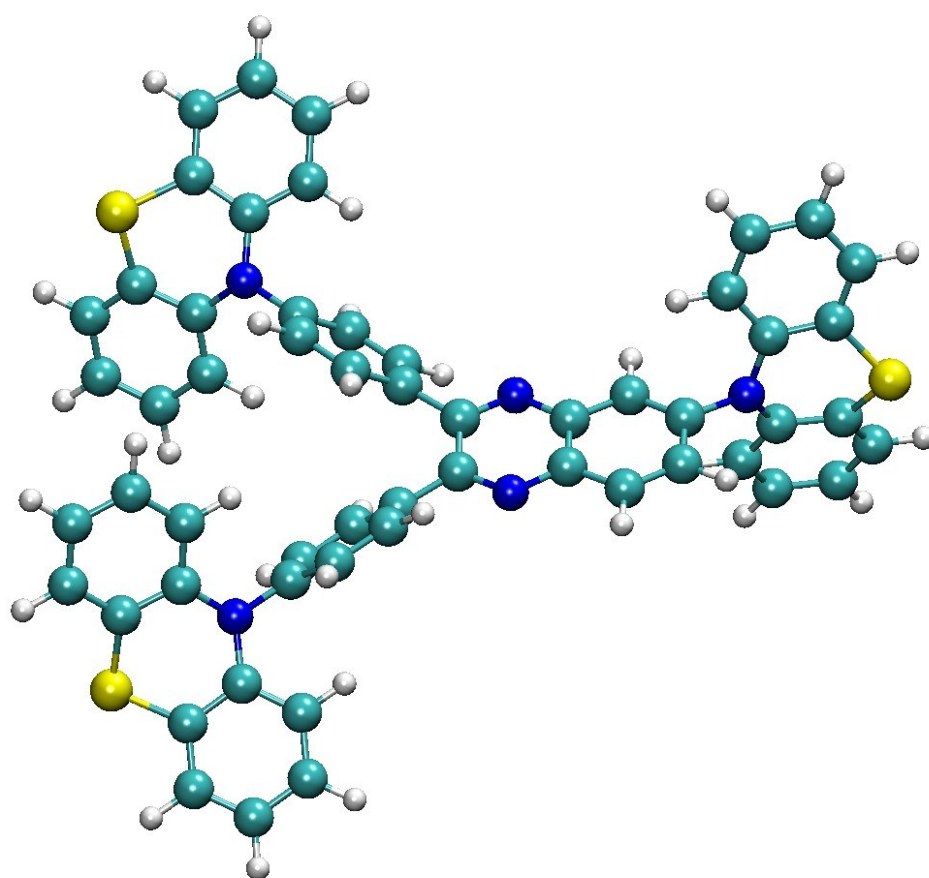

Fig. S32. Optimized structure of **7** (above) and **8** (below).

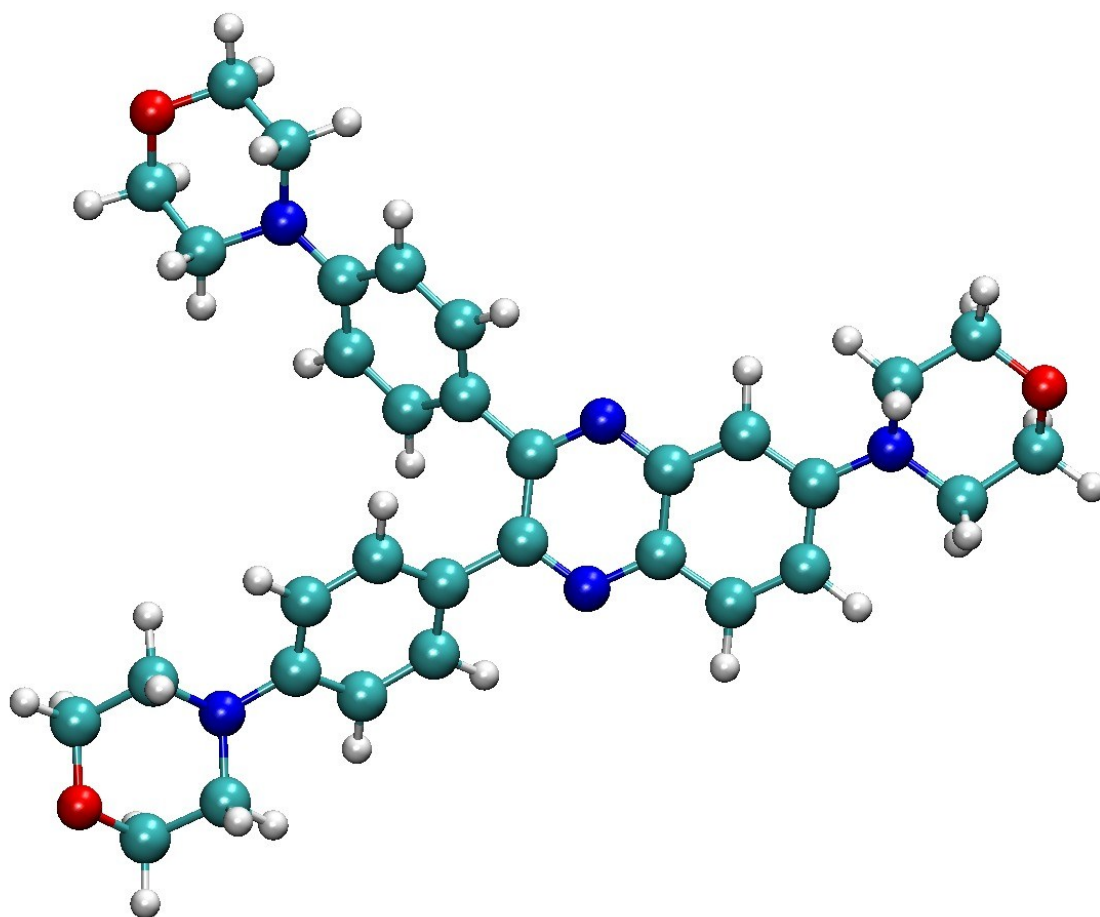

Fig. S33. Optimized structure of **9**

## 11. Frontier molecular orbital of compounds 1 9.

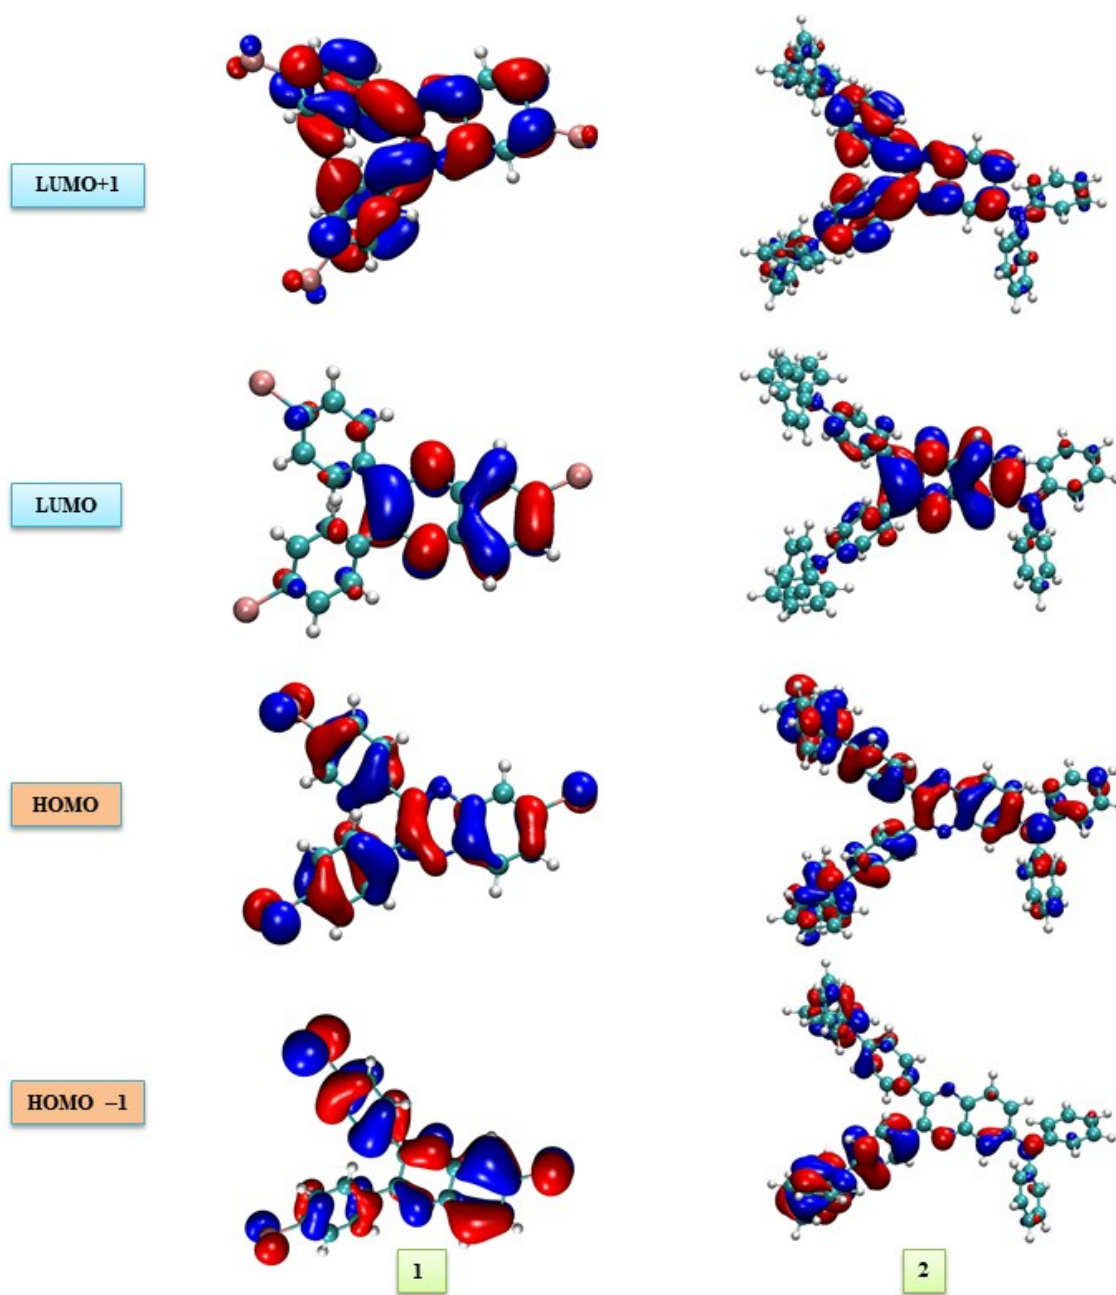

Fig. S34. Frontier molecular orbitals of compound 1 and 2.

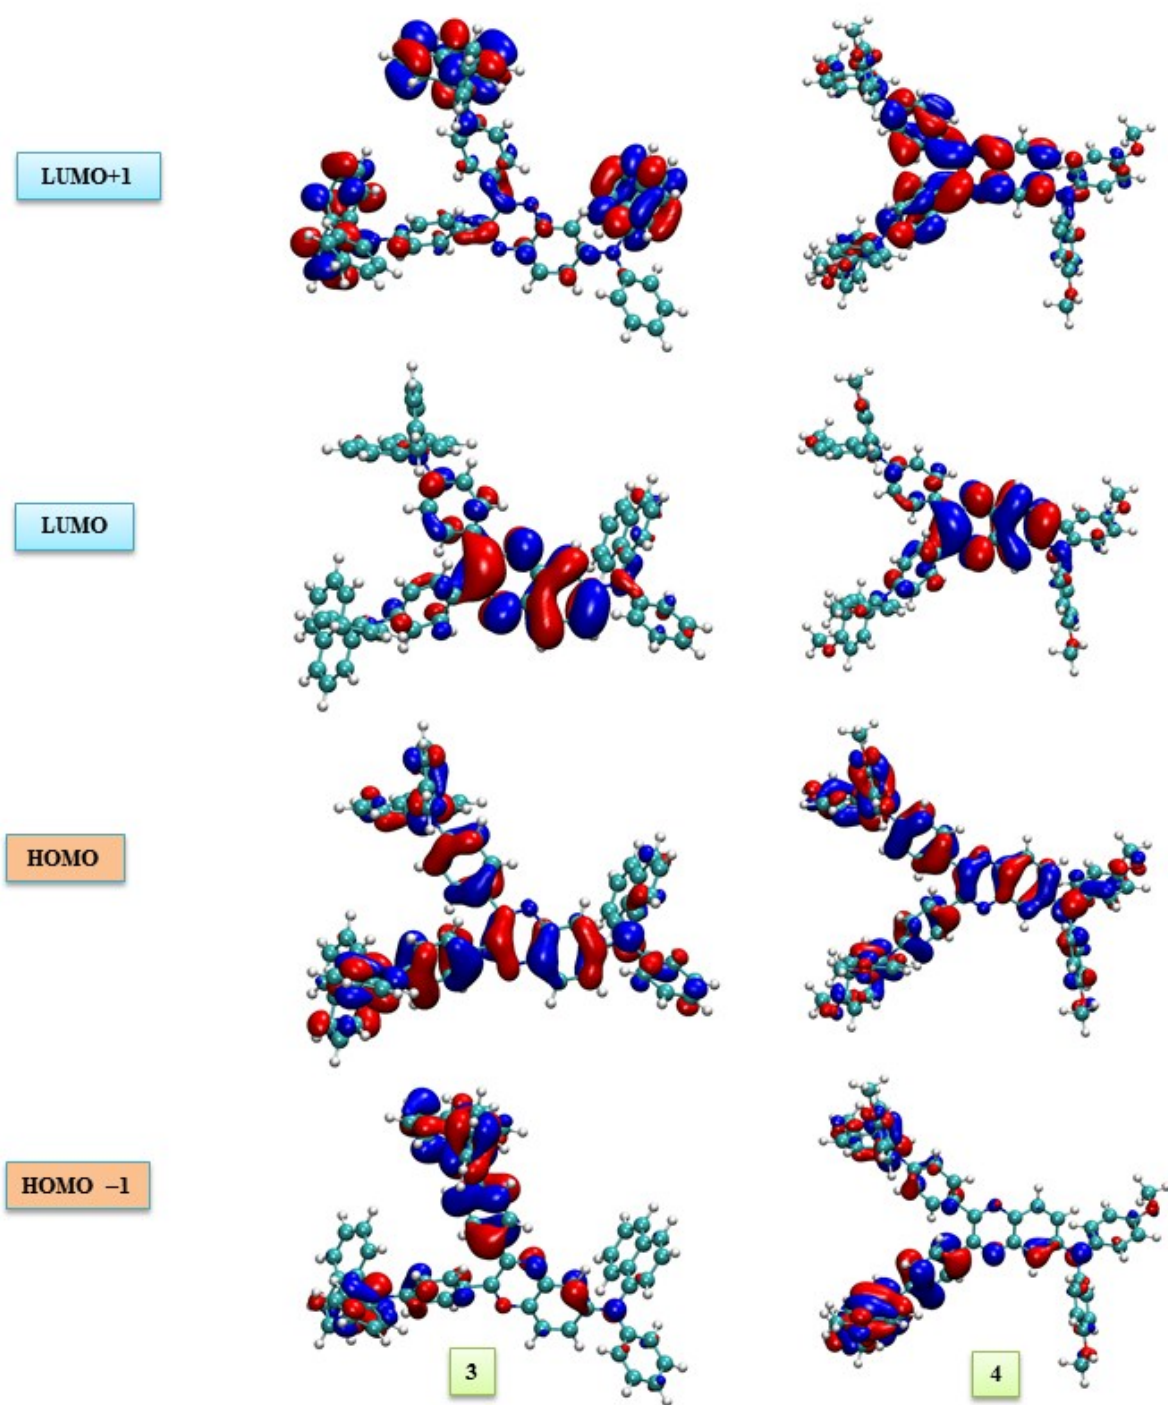

Fig. S35. Frontier molecular orbitals of compound 3 and 4.

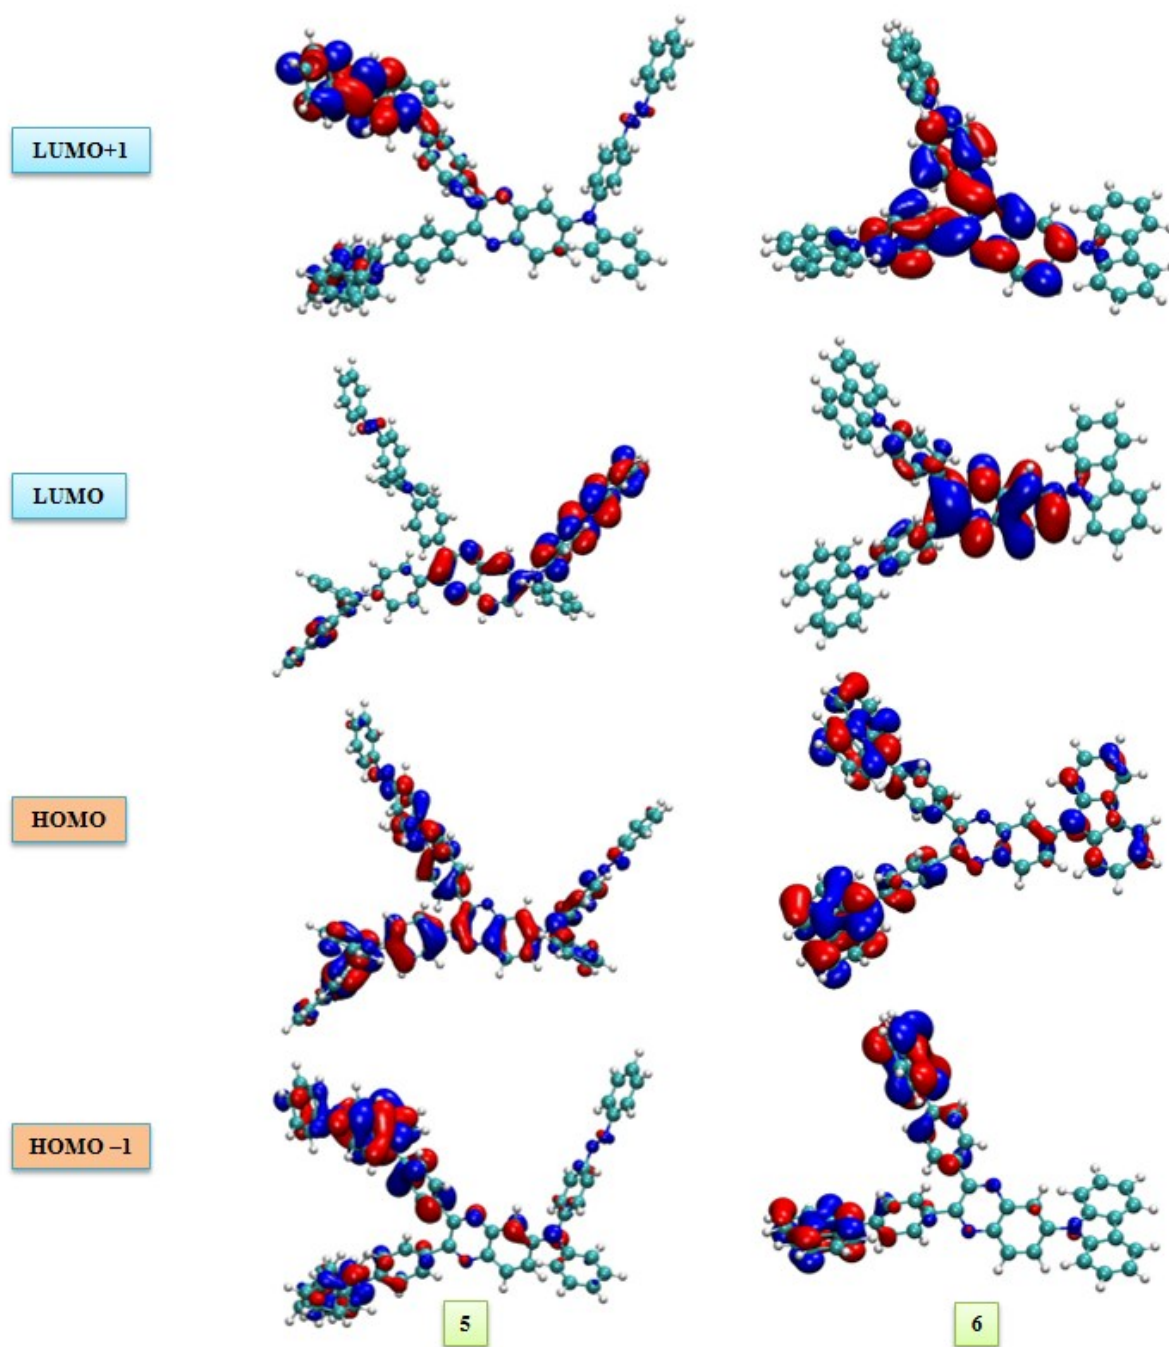

Fig. S36. Frontier molecular orbitals of compound 5 and 6.

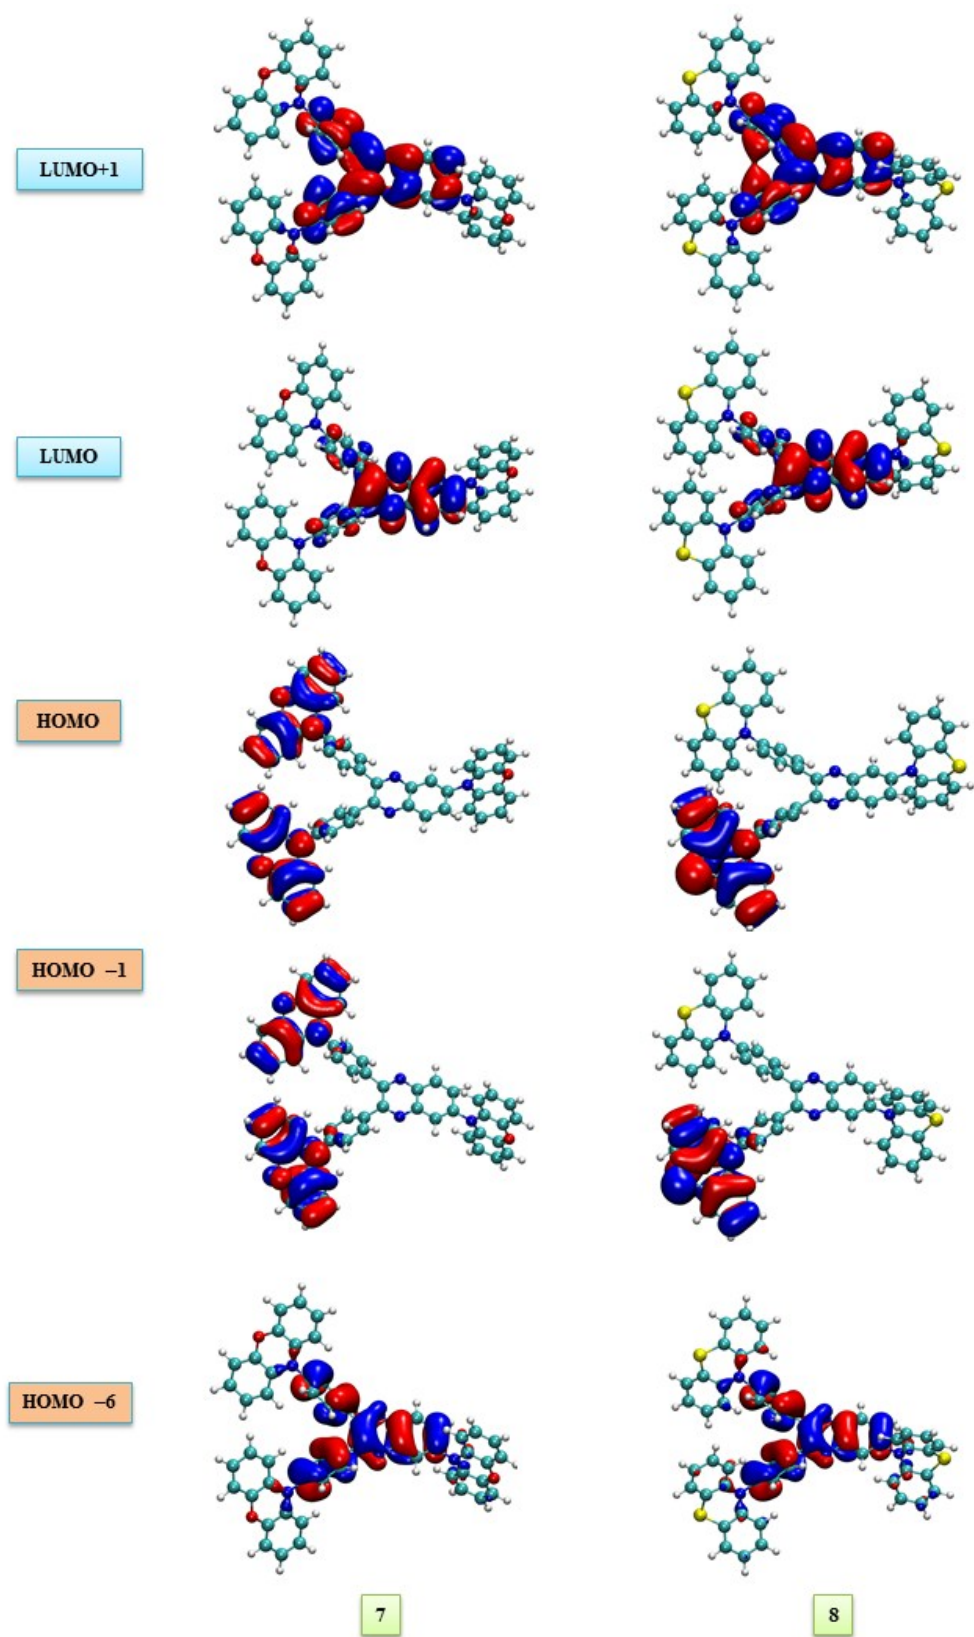

Fig. S37. Frontier molecular orbitals of compound 7 and 8.



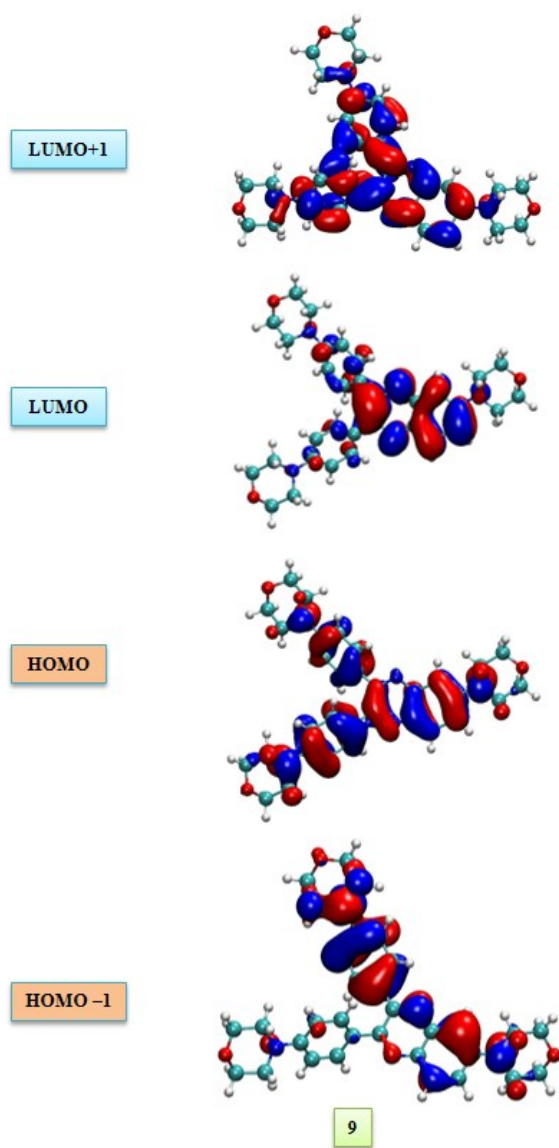

**Fig. S38.** Frontier molecular orbitals of compound **9**.

## 12. Cartesian coordinates and Charges (Mulliken and Lowdin) of compounds 1 9

**Table S2.** Cartesian coordinates of optimized structure of molecule 1.

Total energy: -8600.91787235Hartrees

| Atom | x         | y        | z        | Mulliken charges | Lowdin Charges |
|------|-----------|----------|----------|------------------|----------------|
| C    | 0.695509  | 0.42127  | -0.31617 | -0.31408         | -0.03408       |
| C    | -0.261322 | -0.27734 | -1.15264 | -0.42261         | -0.03722       |
| N    | -0.179456 | -0.20535 | -2.46677 | 0.21884          | -0.03062       |
| C    | 0.860613  | 0.46274  | -3.02209 | -0.06992         | -0.05503       |
| C    | 1.87045   | 1.03372  | -2.19908 | 0.21858          | -0.04901       |
| N    | 1.744829  | 1.01592  | -0.84868 | 0.22122          | -0.03222       |
| C    | 0.975529  | 0.55875  | -4.43071 | -0.27809         | -0.00547       |
| C    | 2.061772  | 1.18259  | -4.99449 | -0.12542         | -0.06601       |
| C    | 3.068221  | 1.72813  | -4.16086 | 0.05625          | -0.23386       |
| C    | 2.991532  | 1.66591  | -2.79211 | -0.40039         | -0.05521       |
| C    | 0.558222  | 0.55899  | 1.15988  | 0.50988          | -0.08296       |
| C    | -1.353616 | -1.13833 | -0.62146 | 0.54543          | -0.08284       |
| Br   | 4.567974  | 2.58226  | -4.9892  | -0.16949         | 0.27823        |
| C    | -0.668097 | 0.86892  | 1.76058  | -0.18899         | -0.01235       |
| C    | -0.763666 | 1.05918  | 3.13575  | -0.37142         | -0.07355       |
| C    | 0.377792  | 0.92531  | 3.92042  | 0.062            | -0.23711       |
| C    | 1.611276  | 0.6252   | 3.34911  | -0.2049          | -0.07492       |
| C    | 1.695507  | 0.45588  | 1.97085  | -0.34141         | -0.00679       |
| C    | -1.138422 | -2.04189 | 0.4264   | -0.16081         | -0.01263       |
| C    | -2.154265 | -2.88665 | 0.86379  | -0.39126         | -0.07349       |
| C    | -3.403363 | -2.81809 | 0.2541   | 0.06432          | -0.23751       |
| C    | -3.64348  | -1.93385 | -0.79394 | -0.19388         | -0.07528       |
| C    | -2.613636 | -1.10794 | -1.2324  | -0.37814         | -0.00742       |
| Br   | 0.248841  | 1.16379  | 5.81679  | -0.16953         | 0.2701         |
| Br   | -4.812843 | -3.96384 | 0.86255  | -0.17045         | 0.2698         |
| H    | 0.197068  | 0.12017  | -5.04341 | 0.18784          | 0.07213        |
| H    | 2.160042  | 1.25666  | -6.06963 | 0.23308          | 0.06262        |
| H    | 3.749901  | 2.0936   | -2.14995 | 0.24084          | 0.07472        |
| H    | -1.559458 | 0.97779  | 1.15523  | 0.20831          | 0.07546        |
| H    | -1.71415  | 1.30971  | 3.58832  | 0.24016          | 0.06297        |
| H    | 2.493795  | 0.52995  | 3.96846  | 0.23859          | 0.0619         |
| H    | 2.653519  | 0.24344  | 1.51274  | 0.21031          | 0.07391        |
| H    | -0.167538 | -2.10261 | 0.90236  | 0.206            | 0.07539        |
| H    | -1.973486 | -3.58901 | 1.66705  | 0.2395           | 0.063          |
| H    | -4.617252 | -1.89334 | -1.26462 | 0.23889          | 0.06172        |
| H    | -2.782911 | -0.43142 | -2.06088 | 0.21074          | 0.07364        |

**Table S3.** Cartesian coordinates of optimized structure of molecule **2**.

Total energy: -2433.01652920Hartrees

| Atom | x        | y        | z        | Mulliken charges | Lowdin Charges |
|------|----------|----------|----------|------------------|----------------|
| C    | -0.87719 | -0.33918 | 0.26784  | -0.45826         | -0.03601       |
| C    | -0.1034  | -1.50953 | -0.09653 | -0.49489         | -0.04418       |
| N    | -0.65546 | -2.71039 | -0.06057 | 0.26294          | -0.03749       |
| C    | -1.97046 | -2.81733 | 0.23557  | -0.21868         | -0.06156       |
| C    | -2.76164 | -1.65566 | 0.45929  | 0.2523           | -0.04551       |
| N    | -2.17515 | -0.43136 | 0.49267  | 0.30743          | -0.04057       |
| C    | -2.59699 | -4.0887  | 0.28308  | -0.14616         | -0.0068        |
| C    | -3.94247 | -4.18934 | 0.52227  | 0.21531          | -0.02076       |
| C    | -4.74795 | -3.02534 | 0.71354  | -1.03198         | -0.04305       |
| C    | -4.15241 | -1.77655 | 0.67644  | -0.29191         | -0.02275       |
| C    | -0.28819 | 1.01185  | 0.46612  | 0.14665          | -0.09059       |
| C    | 1.30592  | -1.46148 | -0.56597 | 0.12686          | -0.09024       |
| N    | -6.13018 | -3.17869 | 0.96831  | 0.78748          | -0.09627       |
| C    | 0.9087   | 1.20545  | 1.16835  | -0.40316         | -0.00985       |
| C    | 1.39882  | 2.48086  | 1.4154   | -0.00891         | -0.03284       |
| C    | 0.70549  | 3.61316  | 0.96267  | -0.7519          | -0.04707       |
| C    | -0.49612 | 3.42553  | 0.26345  | 0.16407          | -0.03299       |
| C    | -0.98346 | 2.14729  | 0.02863  | -0.1488          | -0.00474       |
| C    | 2.20179  | -2.47014 | -0.18412 | -0.16789         | -0.00527       |
| C    | 3.50495  | -2.49622 | -0.66021 | 0.14888          | -0.03352       |
| C    | 3.95927  | -1.51177 | -1.55082 | -0.92083         | -0.04735       |
| C    | 3.06455  | -0.50655 | -1.94674 | 0.04862          | -0.03332       |
| C    | 1.76348  | -0.4856  | -1.46189 | -0.35628         | -0.01054       |
| N    | 1.20313  | 4.91616  | 1.21365  | 0.79433          | -0.09772       |
| N    | 5.28762  | -1.53685 | -2.04365 | 0.78235          | -0.0977        |
| C    | 1.09734  | 5.92624  | 0.21768  | -0.43559         | -0.05711       |
| C    | 1.80494  | 5.22254  | 2.46547  | -0.3348          | -0.05684       |
| C    | -6.88282 | -4.16261 | 0.26832  | -0.2694          | -0.0592        |
| C    | -6.8084  | -2.26795 | 1.83102  | -0.31325         | -0.0576        |
| C    | 5.55682  | -1.19494 | -3.39784 | -0.3257          | -0.0569        |
| C    | 6.36013  | -1.91209 | -1.18748 | -0.36882         | -0.05724       |
| C    | 6.65401  | -0.3846  | -3.72052 | 0.061            | -0.03784       |
| C    | 6.9236   | -0.06196 | -5.0473  | -0.28245         | -0.03887       |
| C    | 6.09833  | -0.52509 | -6.07139 | -0.43242         | -0.05966       |
| C    | 5.00144  | -1.32528 | -5.75276 | -0.15256         | -0.03877       |
| C    | 4.7343   | -1.66667 | -4.43023 | 0.11841          | -0.03847       |

|   |          |          |          |          |          |
|---|----------|----------|----------|----------|----------|
| C | 7.35939  | -2.78411 | -1.6405  | 0.12101  | -0.03719 |
| C | 8.41293  | -3.14093 | -0.80384 | -0.30691 | -0.03858 |
| C | 8.48108  | -2.64961 | 0.49938  | -0.39215 | -0.05899 |
| C | 7.48429  | -1.78756 | 0.9555   | -0.2537  | -0.03896 |
| C | 6.43613  | -1.41301 | 0.11999  | 0.21534  | -0.0383  |
| C | -7.85885 | -4.91229 | 0.93971  | -0.02671 | -0.03539 |
| C | -8.60094 | -5.86982 | 0.25599  | -0.34526 | -0.03765 |
| C | -8.37477 | -6.10771 | -1.09999 | -0.37258 | -0.05754 |
| C | -7.40131 | -5.36774 | -1.76892 | -0.21269 | -0.03767 |
| C | -6.66558 | -4.39541 | -1.0963  | 0.22363  | -0.0408  |
| C | -8.01523 | -1.67899 | 1.4354   | 0.33154  | -0.0351  |
| C | -8.68189 | -0.80423 | 2.28963  | -0.43698 | -0.03769 |
| C | -8.14968 | -0.49363 | 3.53973  | -0.34667 | -0.05524 |
| C | -6.94358 | -1.07428 | 3.9329   | -0.35224 | -0.03749 |
| C | -6.27937 | -1.9608  | 3.09133  | 0.22334  | -0.03294 |
| C | 2.97679  | 5.98946  | 2.52226  | 0.12262  | -0.03792 |
| C | 3.55805  | 6.2945   | 3.74956  | -0.27376 | -0.03883 |
| C | 2.99347  | 5.82969  | 4.93689  | -0.43779 | -0.05964 |
| C | 1.83079  | 5.06147  | 4.8831   | -0.17676 | -0.03874 |
| C | 1.23389  | 4.76552  | 3.66129  | 0.06436  | -0.03846 |
| C | 0.69657  | 7.22455  | 0.56136  | 0.10421  | -0.03742 |
| C | 0.60351  | 8.21254  | -0.41451 | -0.24572 | -0.03848 |
| C | 0.89189  | 7.92218  | -1.7476  | -0.41877 | -0.05908 |
| C | 1.28465  | 6.62962  | -2.09363 | -0.18787 | -0.03871 |
| C | 1.39574  | 5.63989  | -1.12151 | 0.13005  | -0.03845 |
| H | -1.98467 | -4.9698  | 0.13092  | 0.1915   | 0.06957  |
| H | -4.41315 | -5.16322 | 0.57151  | 0.19028  | 0.07645  |
| H | -4.72585 | -0.87166 | 0.8304   | 0.20675  | 0.08621  |
| H | 1.46649  | 0.35109  | 1.53207  | 0.24312  | 0.07406  |
| H | 2.32317  | 2.60439  | 1.96599  | 0.16364  | 0.07532  |
| H | -1.05094 | 4.28736  | -0.08667 | 0.17998  | 0.07517  |
| H | -1.92841 | 2.01844  | -0.48488 | 0.22186  | 0.07238  |
| H | 1.85746  | -3.25254 | 0.48096  | 0.22995  | 0.0721   |
| H | 4.17693  | -3.28645 | -0.34853 | 0.17917  | 0.075    |
| H | 3.39188  | 0.25822  | -2.6401  | 0.16343  | 0.07509  |
| H | 1.0968   | 0.30279  | -1.78916 | 0.24419  | 0.07377  |
| H | 7.29313  | -0.01288 | -2.92879 | 0.15743  | 0.07408  |
| H | 7.77659  | 0.56645  | -5.2788  | 0.18501  | 0.05476  |
| H | 6.30714  | -0.26684 | -7.103   | 0.1538   | 0.05233  |
| H | 4.35558  | -1.70015 | -6.53915 | 0.18699  | 0.055    |
| H | 3.88747  | -2.29844 | -4.19093 | 0.17873  | 0.0749   |
| H | 7.30643  | -3.17761 | -2.64841 | 0.16132  | 0.07427  |

|   |          |          |          |         |         |
|---|----------|----------|----------|---------|---------|
| H | 9.17707  | -3.81773 | -1.17    | 0.18541 | 0.05488 |
| H | 9.29933  | -2.9343  | 1.15046  | 0.15336 | 0.05244 |
| H | 7.52812  | -1.39149 | 1.96409  | 0.1845  | 0.05487 |
| H | 5.67061  | -0.7343  | 0.47607  | 0.15428 | 0.07329 |
| H | -8.03138 | -4.73852 | 1.99498  | 0.1642  | 0.07449 |
| H | -9.35125 | -6.44244 | 0.78992  | 0.18494 | 0.05523 |
| H | -8.95065 | -6.85911 | -1.62747 | 0.15517 | 0.05288 |
| H | -7.22057 | -5.53551 | -2.82489 | 0.18518 | 0.05549 |
| H | -5.9217  | -3.81237 | -1.62574 | 0.18113 | 0.0749  |
| H | -8.42819 | -1.91202 | 0.46147  | 0.17347 | 0.0746  |
| H | -9.61531 | -0.3549  | 1.96917  | 0.18401 | 0.05516 |
| H | -8.66728 | 0.19238  | 4.20005  | 0.16103 | 0.05294 |
| H | -6.52216 | -0.84609 | 4.90556  | 0.18761 | 0.05547 |
| H | -5.34702 | -2.41595 | 3.40311  | 0.17375 | 0.07449 |
| H | 3.42642  | 6.34513  | 1.60309  | 0.15603 | 0.07408 |
| H | 4.46505  | 6.88844  | 3.77518  | 0.18543 | 0.05478 |
| H | 3.45233  | 6.06356  | 5.89044  | 0.1534  | 0.05234 |
| H | 1.37511  | 4.70034  | 5.79852  | 0.18691 | 0.05499 |
| H | 0.32487  | 4.17736  | 3.62729  | 0.18008 | 0.07495 |
| H | 0.46133  | 7.45414  | 1.59361  | 0.15853 | 0.07424 |
| H | 0.29043  | 9.2115   | -0.13146 | 0.18588 | 0.05488 |
| H | 0.81232  | 8.69233  | -2.5059  | 0.14992 | 0.05246 |
| H | 1.52069  | 6.3911   | -3.12486 | 0.18566 | 0.05492 |
| H | 1.71261  | 4.6406   | -1.3945  | 0.14147 | 0.07319 |

**Table S4.** Cartesian coordinates of optimized structure of molecule **3**.

Total energy: -2894.04179310Hartrees

| Atom | x         | y        | z        | Mulliken charges | Lowdin Charges |
|------|-----------|----------|----------|------------------|----------------|
| C    | 1.148631  | -0.25352 | -0.03158 | -0.523           | -0.03416       |
| C    | 1.292608  | 0.92455  | 0.80083  | -0.44609         | -0.04379       |
| N    | 2.26328   | 0.9927   | 1.696    | 0.26727          | -0.03754       |
| C    | 3.169906  | -0.00847 | 1.75511  | -0.19961         | -0.06286       |
| C    | 3.114398  | -1.09363 | 0.83693  | 0.18623          | -0.04272       |
| N    | 2.072073  | -1.19864 | -0.02543 | 0.32309          | -0.04269       |
| C    | 4.224179  | 0.02791  | 2.70366  | -0.141           | -0.00717       |
| C    | 5.182283  | -0.95089 | 2.71354  | 0.06873          | -0.02861       |
| C    | 5.157572  | -2.01921 | 1.76386  | -0.39225         | -0.04597       |
| C    | 4.127697  | -2.07968 | 0.84192  | -0.37336         | -0.02288       |
| C    | -0.031222 | -0.51708 | -0.89634 | 0.10353          | -0.09329       |
| C    | 0.426846  | 2.12794  | 0.69706  | 0.16828          | -0.09365       |

|   |           |          |          |          |          |
|---|-----------|----------|----------|----------|----------|
| N | 6.150414  | -3.02225 | 1.82942  | 0.75976  | -0.10486 |
| C | -1.340094 | -0.23929 | -0.48455 | -0.28788 | -0.00474 |
| C | -2.432101 | -0.56709 | -1.27906 | -0.33401 | -0.03592 |
| C | -2.251952 | -1.18782 | -2.52358 | -0.36672 | -0.0465  |
| C | -0.940762 | -1.48216 | -2.936   | 0.08459  | -0.04385 |
| C | 0.141392  | -1.1563  | -2.13338 | -0.07142 | -0.00339 |
| C | 0.045742  | 2.81587  | 1.85528  | -0.1544  | -0.00142 |
| C | -0.71094  | 3.97891  | 1.79123  | -0.10979 | -0.03455 |
| C | -1.105521 | 4.50716  | 0.55345  | -0.49571 | -0.04786 |
| C | -0.715909 | 3.82832  | -0.61343 | -0.0681  | -0.0433  |
| C | 0.035039  | 2.66427  | -0.53818 | -0.4286  | -0.01112 |
| N | -3.359322 | -1.54884 | -3.32506 | 0.70136  | -0.10508 |
| N | -1.901916 | 5.67463  | 0.48146  | 0.74887  | -0.10611 |
| C | -4.636808 | -1.76531 | -2.71643 | -0.42498 | -0.04887 |
| C | -3.302823 | -1.45988 | -4.7449  | 0.06258  | -0.05287 |
| C | 7.506822  | -2.69697 | 2.11273  | 0.11055  | -0.05435 |
| C | 5.869905  | -4.32518 | 1.30124  | -0.51388 | -0.04884 |
| C | -1.703419 | 6.64513  | -0.53946 | 0.05903  | -0.05203 |
| C | -2.742043 | 6.02217  | 1.58775  | -0.47567 | -0.04913 |
| C | -0.424105 | 6.93724  | -1.03248 | -0.04472 | -0.04461 |
| C | -0.257167 | 7.89728  | -2.02702 | -0.20228 | -0.03889 |
| C | -1.353282 | 8.59302  | -2.53491 | -0.42105 | -0.0613  |
| C | -2.625911 | 8.31273  | -2.03775 | -0.40826 | -0.03776 |
| C | -2.804141 | 7.34434  | -1.05501 | 0.11569  | -0.03431 |
| C | -2.46718  | 7.15367  | 2.32776  | 0.09799  | -0.02377 |
| C | -3.275887 | 7.51962  | 3.42432  | -0.33907 | -0.03645 |
| C | -4.348437 | 6.74138  | 3.78563  | -0.2674  | -0.03022 |
| C | -4.673836 | 5.57458  | 3.04662  | 0.42372  | -0.06205 |
| C | -3.873575 | 5.20824  | 1.91592  | 0.04607  | -0.05583 |
| C | 8.079824  | -1.49704 | 1.67015  | -0.06571 | -0.04579 |
| C | 9.410353  | -1.20486 | 1.96126  | -0.23184 | -0.038   |
| C | 10.194896 | -2.1069  | 2.67714  | -0.41841 | -0.05924 |
| C | 9.630788  | -3.30883 | 3.10601  | -0.38888 | -0.03666 |
| C | 8.298713  | -3.60158 | 2.83465  | 0.04924  | -0.03245 |
| C | 4.936721  | -5.18215 | 1.96748  | 0.06538  | -0.05388 |
| C | 4.671165  | -6.47114 | 1.40145  | 0.36151  | -0.06128 |
| C | 5.352832  | -6.87205 | 0.22307  | -0.33123 | -0.02776 |
| C | 6.262592  | -6.03605 | -0.37623 | -0.40011 | -0.03582 |
| C | 6.515651  | -4.75628 | 0.16183  | 0.15582  | -0.0219  |
| C | -2.623886 | -0.41395 | -5.38453 | 0.01848  | -0.0439  |
| C | -2.589219 | -0.34557 | -6.77471 | -0.25895 | -0.03896 |
| C | -3.24155  | -1.30365 | -7.54922 | -0.44848 | -0.05984 |

|   |           |          |          |          |          |
|---|-----------|----------|----------|----------|----------|
| C | -3.928478 | -2.33878 | -6.91507 | -0.38884 | -0.03738 |
| C | -3.955339 | -2.42323 | -5.52668 | 0.06696  | -0.03288 |
| C | -4.834934 | -2.8693  | -1.82545 | 0.09391  | -0.05677 |
| C | -6.125089 | -3.03883 | -1.22512 | 0.25384  | -0.06243 |
| C | -7.17269  | -2.13817 | -1.5491  | -0.2969  | -0.03096 |
| C | -6.958318 | -1.10734 | -2.43106 | -0.39416 | -0.03765 |
| C | -5.685338 | -0.91726 | -3.00873 | 0.09815  | -0.02444 |
| C | 4.278541  | -4.81954 | 3.17162  | -0.16848 | -0.01289 |
| C | 3.390664  | -5.67761 | 3.77602  | -0.33103 | -0.03499 |
| C | 3.113255  | -6.94208 | 3.20787  | -0.44375 | -0.04226 |
| C | 3.742894  | -7.32814 | 2.05003  | 0.04266  | -0.02884 |
| C | -5.793507 | 4.76927  | 3.38592  | 0.00433  | -0.02972 |
| C | -6.122604 | 3.66412  | 2.63994  | -0.54247 | -0.04263 |
| C | -5.34708  | 3.31746  | 1.50984  | -0.28234 | -0.03649 |
| C | -4.250663 | 4.06858  | 1.15766  | -0.13683 | -0.01322 |
| C | -3.81797  | -3.81425 | -1.52729 | -0.16476 | -0.01209 |
| C | -4.056284 | -4.85956 | -0.66668 | -0.41311 | -0.03467 |
| C | -5.322284 | -5.01474 | -0.05714 | -0.39773 | -0.0423  |
| C | -6.331739 | -4.12602 | -0.33489 | 0.09565  | -0.0303  |
| H | 4.247381  | 0.84472  | 3.41561  | 0.19046  | 0.0693   |
| H | 5.97545   | -0.92462 | 3.45012  | 0.18753  | 0.07615  |
| H | 4.059731  | -2.88426 | 0.12158  | 0.25898  | 0.0873   |
| H | -1.518001 | 0.23612  | 0.47206  | 0.27862  | 0.07498  |
| H | -3.432441 | -0.34573 | -0.92944 | 0.18942  | 0.07562  |
| H | -0.775792 | -1.978   | -3.88453 | 0.1785   | 0.07458  |
| H | 1.143342  | -1.415   | -2.45296 | 0.20578  | 0.07246  |
| H | 0.361384  | 2.43529  | 2.81899  | 0.23039  | 0.07223  |
| H | -0.994735 | 4.48465  | 2.70552  | 0.19892  | 0.0763   |
| H | -1.005483 | 4.21645  | -1.58199 | 0.15136  | 0.07492  |
| H | 0.318757  | 2.16679  | -1.45766 | 0.25148  | 0.07372  |
| H | 0.435962  | 6.41293  | -0.63474 | 0.18524  | 0.07441  |
| H | 0.740249  | 8.11137  | -2.39523 | 0.18814  | 0.05474  |
| H | -1.217935 | 9.34318  | -3.30524 | 0.15729  | 0.05198  |
| H | -3.489532 | 8.84238  | -2.42465 | 0.18386  | 0.05461  |
| H | -3.796468 | 7.12536  | -0.67921 | 0.15919  | 0.07439  |
| H | -1.613093 | 7.76432  | 2.05912  | 0.15224  | 0.07677  |
| H | -3.032989 | 8.41308  | 3.98833  | 0.1813   | 0.05624  |
| H | -4.965026 | 7.01245  | 4.63598  | 0.14477  | 0.05937  |
| H | 7.484602  | -0.79703 | 1.09678  | 0.18042  | 0.07439  |
| H | 9.837313  | -0.27143 | 1.61128  | 0.18743  | 0.05524  |
| H | 11.231396 | -1.87874 | 2.89628  | 0.15559  | 0.05255  |
| H | 10.22775  | -4.01982 | 3.66642  | 0.18561  | 0.05509  |

|   |           |          |          |         |         |
|---|-----------|----------|----------|---------|---------|
| H | 7.863945  | -4.53282 | 3.17772  | 0.15847 | 0.07481 |
| H | 5.14633   | -7.85214 | -0.19352 | 0.14722 | 0.05971 |
| H | 6.78328   | -6.34676 | -1.27486 | 0.18215 | 0.0564  |
| H | 7.225292  | -4.09642 | -0.32334 | 0.1544  | 0.07685 |
| H | -2.125639 | 0.34298  | -4.79151 | 0.15209 | 0.07304 |
| H | -2.060314 | 0.47157  | -7.25298 | 0.1894  | 0.05482 |
| H | -3.216556 | -1.24397 | -8.63102 | 0.15581 | 0.05222 |
| H | -4.437661 | -3.09386 | -7.5038  | 0.18651 | 0.0548  |
| H | -4.4828   | -3.2345  | -5.03923 | 0.16286 | 0.07462 |
| H | -8.147175 | -2.28244 | -1.09479 | 0.14928 | 0.05939 |
| H | -7.761759 | -0.42341 | -2.68042 | 0.18103 | 0.05619 |
| H | -5.521327 | -0.09361 | -3.69368 | 0.147   | 0.07651 |
| H | 4.485584  | -3.85405 | 3.61387  | 0.17821 | 0.07564 |
| H | 2.89889   | -5.38409 | 4.69662  | 0.17923 | 0.05572 |
| H | 2.406716  | -7.60656 | 3.69235  | 0.16347 | 0.05432 |
| H | 3.541973  | -8.30088 | 1.61329  | 0.15676 | 0.05941 |
| H | -6.391173 | 5.04803  | 4.24759  | 0.14988 | 0.05928 |
| H | -6.980743 | 3.05912  | 2.91033  | 0.16886 | 0.05431 |
| H | -5.621778 | 2.45291  | 0.91601  | 0.13332 | 0.05495 |
| H | -3.664683 | 3.79499  | 0.2902   | 0.18936 | 0.07609 |
| H | -2.844217 | -3.70464 | -1.98554 | 0.18576 | 0.0775  |
| H | -3.266997 | -5.57138 | -0.45279 | 0.18168 | 0.05635 |
| H | -5.494406 | -5.84073 | 0.62379  | 0.16301 | 0.05427 |
| H | -7.309628 | -4.24535 | 0.12001  | 0.16173 | 0.05914 |

**Table S5.** Cartesian coordinates of optimized structure of molecule 4.

Total energy: -3120.34811675Hartrees

| Atom | x        | y        | z        | Mulliken charges | Lowdin Charges |
|------|----------|----------|----------|------------------|----------------|
| C    | 0.412084 | 0.44298  | 1.063481 | -0.3893          | -0.03566       |
| C    | 1.062406 | -0.85208 | 1.016303 | -0.40358         | -0.04673       |
| N    | 1.67308  | -1.32887 | 2.088503 | 0.26453          | -0.03999       |
| C    | 1.603099 | -0.63357 | 3.245393 | -0.28801         | -0.06546       |
| C    | 0.845255 | 0.56845  | 3.327522 | 0.31092          | -0.0452        |
| N    | 0.284148 | 1.0925   | 2.207183 | 0.30028          | -0.04603       |
| C    | 2.24382  | -1.1136  | 4.416012 | -0.1977          | -0.00883       |
| C    | 2.116528 | -0.44202 | 5.603157 | 0.15909          | -0.02522       |
| C    | 1.327767 | 0.74658  | 5.701697 | -0.65086         | -0.03965       |
| C    | 0.70186  | 1.23389  | 4.565062 | -0.30431         | -0.03157       |



|   |           |          |          |          |          |
|---|-----------|----------|----------|----------|----------|
| C | -0.106092 | 1.15219  | -0.13551 | 0.11262  | -0.09636 |
| C | 1.060901  | -1.74243 | -0.17333 | 0.04385  | -0.09504 |
| N | 1.236958  | 1.4103   | 6.941    | 0.83236  | -0.09899 |
| C | -1.295274 | 1.89035  | -0.0509  | -0.12142 | -0.00497 |
| C | -1.772534 | 2.62005  | -1.12974 | 0.16352  | -0.04017 |
| C | -1.062718 | 2.65426  | -2.34239 | -0.58342 | -0.04227 |
| C | 0.138281  | 1.93042  | -2.42699 | -0.10927 | -0.0403  |
| C | 0.601195  | 1.19441  | -1.34457 | -0.34078 | -0.0092  |
| C | -0.079344 | -1.93428 | -0.96622 | -0.34006 | -0.01132 |
| C | -0.081195 | -2.83282 | -2.02417 | -0.03523 | -0.03896 |
| C | 1.066572  | -3.58128 | -2.33372 | -0.68247 | -0.04441 |
| C | 2.209596  | -3.39812 | -1.53813 | 0.14815  | -0.04078 |
| C | 2.198884  | -2.50159 | -0.47874 | -0.10021 | -0.00588 |
| N | -1.538986 | 3.4028   | -3.43934 | 0.83261  | -0.10107 |
| N | 1.067065  | -4.49397 | -3.41119 | 0.83098  | -0.10106 |
| C | -2.939148 | 3.54449  | -3.66719 | -0.55772 | -0.07536 |
| C | 1.017602  | 2.82076  | 6.995714 | -0.63363 | -0.07571 |
| C | 1.200515  | 0.67149  | 8.159588 | -0.48408 | -0.077   |
| C | 2.256958  | -4.73395 | -4.15712 | -0.67241 | -0.07436 |
| C | -0.104671 | -5.24117 | -3.72667 | -0.58772 | -0.07503 |
| C | 3.028054  | -3.66498 | -4.64064 | 0.22282  | -0.02183 |
| C | 4.183593  | -3.89549 | -5.3691  | -0.21494 | -0.02753 |
| C | 4.592066  | -5.20415 | -5.65608 | -0.72059 | -0.03017 |
| C | 3.825668  | -6.27576 | -5.19434 | 0.27249  | -0.06988 |
| C | 2.674722  | -6.03443 | -4.44196 | 0.06346  | -0.0212  |
| C | -0.539257 | -5.35741 | -5.05605 | 0.11402  | -0.01866 |
| C | -1.669005 | -6.09521 | -5.37241 | -0.13253 | -0.02798 |
| C | -2.410009 | -6.72419 | -4.36446 | -0.73435 | -0.03027 |
| C | -1.992651 | -6.60934 | -3.03669 | 0.15607  | -0.07103 |
| C | -0.841308 | -5.88252 | -2.72967 | 0.16089  | -0.02293 |
| C | -0.035104 | 3.35434  | 7.752186 | 0.08513  | -0.01765 |
| C | -0.236106 | 4.72448  | 7.820664 | -0.06185 | -0.02642 |
| C | 0.601406  | 5.5986   | 7.118534 | -0.78864 | -0.0273  |
| C | 1.65072   | 5.0774   | 6.356621 | 0.10851  | -0.06871 |
| C | 1.857367  | 3.69905  | 6.310077 | 0.24762  | -0.01704 |
| C | 1.954847  | 1.09482  | 9.265086 | 0.11479  | -0.01706 |
| C | 1.916741  | 0.39533  | 10.46001 | -0.16467 | -0.02559 |
| C | 1.135683  | -0.76136 | 10.58001 | -0.69971 | -0.02916 |
| C | 0.385196  | -1.1959  | 9.485857 | 0.07002  | -0.07041 |
| C | 0.41217   | -0.47226 | 8.292009 | 0.12596  | -0.02571 |
| C | -3.49654  | 4.80714  | -3.91994 | 0.11447  | -0.01786 |
| C | -4.854668 | 4.94937  | -4.15587 | -0.03755 | -0.02714 |

|   |           |          |          |          |          |
|---|-----------|----------|----------|----------|----------|
| C | -5.699576 | 3.83314  | -4.12778 | -0.79737 | -0.02951 |
| C | -5.158135 | 2.57182  | -3.87003 | 0.0697   | -0.07108 |
| C | -3.785818 | 2.43532  | -3.65472 | 0.20742  | -0.02251 |
| C | -0.630756 | 4.0217   | -4.34652 | -0.69894 | -0.07482 |
| C | 0.451875  | 4.78029  | -3.87372 | 0.16005  | -0.0218  |
| C | 1.330165  | 5.3893   | -4.75519 | -0.07695 | -0.02742 |
| C | 1.139948  | 5.27604  | -6.13817 | -0.76622 | -0.02983 |
| C | 0.058885  | 4.53618  | -6.62084 | 0.13561  | -0.06993 |
| C | -0.809204 | 3.90828  | -5.72571 | 0.12062  | -0.02006 |
| O | 2.054779  | 5.9222   | -6.92203 | -0.15833 | -0.17838 |
| O | 1.175948  | -1.38583 | 11.79477 | -0.16022 | -0.17753 |
| O | -7.023548 | 4.07953  | -4.36225 | -0.15967 | -0.17833 |
| O | 5.739617  | -5.32489 | -6.38959 | -0.15865 | -0.17853 |
| O | 0.3149    | 6.92872  | 7.239852 | -0.15893 | -0.17718 |
| O | -3.513728 | -7.41835 | -4.77684 | -0.16003 | -0.17892 |
| C | 1.919282  | 5.83365  | -8.33283 | -0.32674 | 0.05527  |
| H | 2.743027  | 6.41185  | -8.74846 | 0.17744  | 0.05326  |
| H | 1.994743  | 4.79658  | -8.67825 | 0.15082  | 0.04483  |
| H | 0.969497  | 6.26186  | -8.6723  | 0.15023  | 0.04451  |
| C | 0.402254  | -2.56303 | 11.97683 | -0.3243  | 0.05572  |
| H | 0.58692   | -2.8858  | 13.00017 | 0.17622  | 0.05353  |
| H | -0.667291 | -2.3634  | 11.8478  | 0.15094  | 0.04487  |
| H | 0.71061   | -3.35556 | 11.28592 | 0.15183  | 0.04496  |
| C | 1.121523  | 7.8628   | 6.536272 | -0.32734 | 0.05599  |
| H | 0.710686  | 8.84435  | 6.767206 | 0.17531  | 0.05347  |
| H | 2.16506   | 7.82072  | 6.867466 | 0.15026  | 0.04464  |
| H | 1.075439  | 7.69621  | 5.454474 | 0.15565  | 0.04582  |
| C | -4.299708 | -8.0813  | -3.79759 | -0.32316 | 0.055    |
| H | -5.112433 | -8.56032 | -4.3414  | 0.17548  | 0.05313  |
| H | -3.719488 | -8.8449  | -3.2676  | 0.15079  | 0.04467  |
| H | -4.717165 | -7.37385 | -3.0723  | 0.15176  | 0.04462  |
| C | 6.209772  | -6.6285  | -6.69966 | -0.32071 | 0.05514  |
| H | 7.124135  | -6.48713 | -7.27383 | 0.17655  | 0.05322  |
| H | 6.436774  | -7.19879 | -5.79201 | 0.15039  | 0.04478  |
| H | 5.48429   | -7.18287 | -7.3056  | 0.15008  | 0.04445  |
| C | -7.928186 | 2.98489  | -4.35103 | -0.32519 | 0.05523  |
| H | -8.910392 | 3.40766  | -4.55646 | 0.17585  | 0.05331  |
| H | -7.680355 | 2.25214  | -5.12702 | 0.15018  | 0.04463  |
| H | -7.945286 | 2.48867  | -3.37422 | 0.15209  | 0.04485  |
| H | 2.836718  | -2.01792 | 4.343071 | 0.18738  | 0.06828  |
| H | 2.621371  | -0.8078  | 6.488229 | 0.1927   | 0.07479  |
| H | 0.108624  | 2.13849  | 4.591019 | 0.23987  | 0.08449  |

|   |           |          |          |         |         |
|---|-----------|----------|----------|---------|---------|
| H | -1.838345 | 1.90157  | 0.886365 | 0.22035 | 0.07168 |
| H | -2.695594 | 3.17831  | -1.03474 | 0.18646 | 0.07326 |
| H | 0.709602  | 1.94742  | -3.34648 | 0.18689 | 0.07372 |
| H | 1.53076   | 0.64769  | -1.44586 | 0.24725 | 0.07382 |
| H | -0.983087 | -1.37524 | -0.75611 | 0.24846 | 0.0732  |
| H | -0.978503 | -2.96089 | -2.61657 | 0.17712 | 0.07324 |
| H | 3.105442  | -3.96877 | -1.74886 | 0.19074 | 0.07336 |
| H | 3.080722  | -2.39526 | 0.141143 | 0.22687 | 0.07136 |
| H | 2.71562   | -2.64799 | -4.43594 | 0.17414 | 0.07527 |
| H | 4.78039   | -3.07151 | -5.7418  | 0.20612 | 0.06892 |
| H | 4.113786  | -7.29849 | -5.39743 | 0.20172 | 0.05934 |
| H | 2.0916    | -6.87269 | -4.07981 | 0.16933 | 0.07489 |
| H | 0.020818  | -4.86711 | -5.84347 | 0.1698  | 0.07545 |
| H | -2.005084 | -6.18635 | -6.39846 | 0.20515 | 0.06848 |
| H | -2.539061 | -7.08774 | -2.23485 | 0.20497 | 0.0596  |
| H | -0.519679 | -5.80761 | -1.69773 | 0.1803  | 0.07644 |
| H | -0.694524 | 2.68676  | 8.293955 | 0.17847 | 0.07567 |
| H | -1.048433 | 5.13958  | 8.405122 | 0.20621 | 0.06888 |
| H | 2.319015  | 5.72635  | 5.806749 | 0.21011 | 0.06018 |
| H | 2.677773  | 3.30338  | 5.723045 | 0.16721 | 0.07597 |
| H | 2.569782  | 1.98291  | 9.179822 | 0.17679 | 0.0757  |
| H | 2.498136  | 0.72066  | 11.31442 | 0.20465 | 0.06911 |
| H | -0.234019 | -2.08072 | 9.548106 | 0.2032  | 0.0599  |
| H | -0.185979 | -0.80915 | 7.453679 | 0.18279 | 0.07624 |
| H | -2.853356 | 5.67903  | -3.93424 | 0.1727  | 0.07565 |
| H | -5.287073 | 5.92338  | -4.35126 | 0.20749 | 0.06873 |
| H | -5.782258 | 1.68852  | -3.84759 | 0.20835 | 0.05955 |
| H | -3.372133 | 1.45162  | -3.46656 | 0.16455 | 0.07497 |
| H | 0.602855  | 4.88529  | -2.80596 | 0.18827 | 0.07665 |
| H | 2.166753  | 5.97425  | -4.39196 | 0.20721 | 0.06898 |
| H | -0.115826 | 4.4282   | -7.68298 | 0.20206 | 0.0594  |
| H | -1.641872 | 3.3307   | -6.10943 | 0.16372 | 0.07487 |

**Table S6.** Cartesian coordinates of optimized structure of molecule **5**.

Total energy: -3454.81269468Hartrees

| Atom | x         | y       | z         | Mulliken charges | Lowdin Charges |
|------|-----------|---------|-----------|------------------|----------------|
| C    | -1.615837 | 0.11755 | -0.149846 | -0.4262          | -0.03504       |
| C    | -1.895879 | 0.66638 | -1.462371 | -0.44001         | -0.0424        |

|   |           |          |           |          |          |
|---|-----------|----------|-----------|----------|----------|
| N | -3.128858 | 0.66354  | -1.93768  | 0.27038  | -0.0352  |
| C | -4.133243 | 0.21939  | -1.147729 | -0.20733 | -0.05909 |
| C | -3.874966 | -0.19702 | 0.188436  | 0.27881  | -0.04573 |
| N | -2.598606 | -0.25744 | 0.647507  | 0.31501  | -0.03825 |
| C | -5.469455 | 0.20487  | -1.621887 | -0.20116 | -0.00449 |
| C | -6.491484 | -0.19034 | -0.798372 | 0.08982  | -0.01691 |
| C | -6.240672 | -0.58179 | 0.550751  | -0.68041 | -0.04444 |
| C | -4.943781 | -0.57498 | 1.031136  | -0.2801  | -0.01785 |
| C | -0.243149 | -0.10657 | 0.377124  | 0.15347  | -0.08733 |
| C | -0.869782 | 1.29404  | -2.336266 | 0.13248  | -0.08644 |
| C | 0.777239  | -0.65371 | -0.411842 | -0.31093 | -0.00868 |
| C | 2.031405  | -0.92078 | 0.121126  | -0.06541 | -0.02739 |
| C | 2.30696   | -0.64405 | 1.467326  | -0.86288 | -0.04869 |
| C | 1.285701  | -0.11048 | 2.266411  | 0.17845  | -0.03036 |
| C | 0.032762  | 0.14675  | 1.727786  | -0.09411 | -0.0033  |
| C | 0.103893  | 2.16794  | -1.834258 | -0.30389 | -0.00942 |
| C | 1.009975  | 2.79493  | -2.67944  | -0.0456  | -0.02665 |
| C | 0.971717  | 2.56492  | -4.061277 | -0.87434 | -0.05016 |
| C | -0.009024 | 1.70347  | -4.572705 | 0.16527  | -0.03049 |
| C | -0.914912 | 1.08538  | -3.721908 | -0.11499 | -0.00474 |
| N | 1.896749  | 3.21106  | -4.924665 | 0.8472   | -0.08898 |
| N | 3.589454  | -0.9172  | 2.012292  | 0.8509   | -0.08849 |
| N | -7.328234 | -0.98609 | 1.36477   | 0.84251  | -0.08831 |
| C | 4.201339  | -0.01575 | 2.909213  | -0.4898  | -0.03943 |
| C | 4.256978  | -2.12541 | 1.648489  | -0.42041 | -0.06088 |
| C | -8.55414  | -0.25962 | 1.302734  | -0.39044 | -0.06232 |
| C | -7.187827 | -2.04659 | 2.292144  | -0.55209 | -0.04093 |
| C | 2.200486  | 4.58872  | -4.707171 | -0.40327 | -0.06097 |
| C | 2.502124  | 2.51272  | -5.98997  | -0.4708  | -0.03886 |
| C | 2.790528  | 3.16018  | -7.202251 | 0.23561  | -0.03972 |
| C | 3.399667  | 2.46779  | -8.23803  | 0.08903  | -0.0029  |
| C | 3.72817   | 1.11322  | -8.104606 | -0.87728 | -0.1071  |
| C | 3.439466  | 0.46122  | -6.892957 | -0.07724 | -0.00297 |
| C | 2.842087  | 1.15044  | -5.854593 | -0.04085 | -0.03283 |
| C | 1.170806  | 5.51509  | -4.503993 | 0.08499  | -0.03213 |
| C | 1.470227  | 6.85583  | -4.278127 | -0.21231 | -0.03656 |
| C | 2.794567  | 7.29191  | -4.265654 | -0.44931 | -0.05206 |
| C | 3.821031  | 6.37093  | -4.473774 | -0.20488 | -0.03711 |
| C | 3.530342  | 5.02635  | -4.685563 | 0.07465  | -0.03387 |
| C | 4.993377  | -0.48426 | 3.969639  | 0.23976  | -0.03877 |
| C | 5.600958  | 0.41067  | 4.837734  | 0.09921  | -0.00281 |
| C | 5.431255  | 1.79198  | 4.683915  | -0.89444 | -0.10655 |

|   |           |          |           |          |          |
|---|-----------|----------|-----------|----------|----------|
| C | 4.63971   | 2.26475  | 3.622651  | -0.07522 | -0.00313 |
| C | 4.040475  | 1.37631  | 2.749799  | -0.03496 | -0.03249 |
| C | 5.599664  | -2.10024 | 1.252103  | 0.09329  | -0.03384 |
| C | 6.247324  | -3.28082 | 0.900151  | -0.2166  | -0.03705 |
| C | 5.563489  | -4.49607 | 0.923179  | -0.44349 | -0.05205 |
| C | 4.223769  | -4.52119 | 1.308869  | -0.21582 | -0.03642 |
| C | 3.573202  | -3.34662 | 1.676843  | 0.08475  | -0.03225 |
| C | -6.466672 | -3.20256 | 1.957359  | 0.21874  | -0.03465 |
| C | -6.337569 | -4.235   | 2.873862  | 0.14448  | -0.00291 |
| C | -6.932445 | -4.15208 | 4.13912   | -1.05109 | -0.10332 |
| C | -7.658341 | -2.99752 | 4.475691  | 0.00598  | -0.00199 |
| C | -7.778938 | -1.96095 | 3.567501  | 0.0199   | -0.02835 |
| C | -9.776448 | -0.94181 | 1.251254  | 0.04061  | -0.03326 |
| C | -10.97171 | -0.23186 | 1.195423  | -0.27134 | -0.03587 |
| C | -10.96601 | 1.16297  | 1.173149  | -0.3527  | -0.0517  |
| C | -9.750086 | 1.84321  | 1.215405  | -0.36854 | -0.03571 |
| C | -8.550124 | 1.14046  | 1.28814   | 0.26925  | -0.03567 |
| N | -6.73816  | -5.26207 | 4.987589  | 0.09469  | -0.04806 |
| N | -7.30858  | -5.19701 | 6.103987  | 0.10221  | -0.05566 |
| C | -7.101158 | -6.31069 | 6.956457  | -0.3833  | -0.0934  |
| C | -6.304014 | -7.42225 | 6.639572  | 0.1036   | -0.01986 |
| C | -6.172156 | -8.45551 | 7.557118  | -0.19148 | -0.04219 |
| C | -6.8267   | -8.39667 | 8.791997  | -0.31642 | -0.04006 |
| C | -7.61796  | -7.29373 | 9.107386  | -0.20515 | -0.04708 |
| C | -7.75433  | -6.25299 | 8.192895  | 0.033    | -0.02029 |
| N | 4.340882  | 0.51068  | -9.221208 | 0.10649  | -0.04829 |
| N | 4.605397  | -0.71136 | -9.101871 | 0.08315  | -0.05878 |
| C | 5.228062  | -1.30905 | -10.22642 | -0.33157 | -0.09324 |
| C | 5.55794   | -0.63252 | -11.4118  | 0.19698  | -0.02077 |
| C | 6.168366  | -1.32375 | -12.44941 | -0.24231 | -0.04264 |
| C | 6.456514  | -2.68667 | -12.32263 | -0.32188 | -0.04143 |
| C | 6.129525  | -3.35906 | -11.14654 | -0.20094 | -0.04765 |
| C | 5.517439  | -2.67274 | -10.10144 | -0.05743 | -0.02149 |
| N | 6.090499  | 2.60654  | 5.626106  | 0.10723  | -0.04821 |
| N | 5.911967  | 3.84273  | 5.494211  | 0.08338  | -0.05846 |
| C | 6.580769  | 4.65603  | 6.443356  | -0.32873 | -0.09322 |
| C | 7.38945   | 4.17082  | 7.483622  | 0.19323  | -0.02057 |
| C | 7.99496   | 5.06482  | 8.356086  | -0.24212 | -0.04255 |
| C | 7.805658  | 6.44263  | 8.206243  | -0.32122 | -0.04129 |
| C | 7.002985  | 6.92523  | 7.174257  | -0.20388 | -0.04765 |
| C | 6.391949  | 6.03496  | 6.295578  | -0.0537  | -0.02142 |
| H | -5.655995 | 0.50852  | -2.64521  | 0.19503  | 0.07052  |

|   |           |          |           |         |         |
|---|-----------|----------|-----------|---------|---------|
| H | -7.50939  | -0.21123 | -1.167242 | 0.19526 | 0.07755 |
| H | -4.714697 | -0.87292 | 2.046186  | 0.22598 | 0.08748 |
| H | 0.593699  | -0.87802 | -1.455427 | 0.2509  | 0.07454 |
| H | 2.803593  | -1.34838 | -0.506426 | 0.18217 | 0.07653 |
| H | 1.47562   | 0.0933   | 3.31313   | 0.18758 | 0.07666 |
| H | -0.756317 | 0.53227  | 2.361552  | 0.2221  | 0.07351 |
| H | 0.157145  | 2.36565  | -0.770768 | 0.24879 | 0.0744  |
| H | 1.750515  | 3.47108  | -2.270196 | 0.18196 | 0.07657 |
| H | -0.063221 | 1.52701  | -5.640089 | 0.18637 | 0.07646 |
| H | -1.684874 | 0.44286  | -4.130963 | 0.23061 | 0.07312 |
| H | 2.53261   | 4.20414  | -7.326817 | 0.17882 | 0.07515 |
| H | 3.619116  | 2.96153  | -9.17759  | 0.19393 | 0.06816 |
| H | 3.708622  | -0.58094 | -6.780388 | 0.25263 | 0.07289 |
| H | 2.63903   | 0.64415  | -4.919119 | 0.17399 | 0.07366 |
| H | 0.140629  | 5.17996  | -4.521455 | 0.17281 | 0.07581 |
| H | 0.66326   | 7.56327  | -4.123214 | 0.19093 | 0.05604 |
| H | 3.024444  | 8.33712  | -4.094786 | 0.15618 | 0.05389 |
| H | 4.85513   | 6.69662  | -4.458251 | 0.19309 | 0.05623 |
| H | 4.329917  | 4.31087  | -4.836109 | 0.15748 | 0.07551 |
| H | 5.126025  | -1.5495  | 4.109619  | 0.17937 | 0.07537 |
| H | 6.207253  | 0.05422  | 5.662382  | 0.19499 | 0.06825 |
| H | 4.522364  | 3.33237  | 3.490096  | 0.25318 | 0.07288 |
| H | 3.445791  | 1.74982  | 1.92541   | 0.17493 | 0.07373 |
| H | 6.12989   | -1.1559  | 1.223507  | 0.15746 | 0.07548 |
| H | 7.286888  | -3.24761 | 0.593783  | 0.19267 | 0.05623 |
| H | 6.06887   | -5.41284 | 0.64274   | 0.15664 | 0.0539  |
| H | 3.683492  | -5.46085 | 1.336553  | 0.19179 | 0.05617 |
| H | 2.534776  | -3.36955 | 1.98503   | 0.17342 | 0.07598 |
| H | -6.010066 | -3.28603 | 0.979273  | 0.19568 | 0.0754  |
| H | -5.785539 | -5.13258 | 2.620735  | 0.20196 | 0.0686  |
| H | -8.104753 | -2.92479 | 5.458824  | 0.23033 | 0.07323 |
| H | -8.32843  | -1.06786 | 3.838493  | 0.18381 | 0.07593 |
| H | -9.783353 | -2.02516 | 1.256564  | 0.16353 | 0.07573 |
| H | -11.91083 | -0.77226 | 1.155324  | 0.19112 | 0.05651 |
| H | -11.89864 | 1.7126   | 1.122948  | 0.15936 | 0.05414 |
| H | -9.732654 | 2.92727  | 1.205444  | 0.18583 | 0.05639 |
| H | -7.607657 | 1.67283  | 1.334895  | 0.18527 | 0.07566 |
| H | -5.802589 | -7.45415 | 5.681306  | 0.17691 | 0.06986 |
| H | -5.555901 | -9.31433 | 7.314467  | 0.18778 | 0.05409 |
| H | -6.717054 | -9.20837 | 9.502427  | 0.14755 | 0.05352 |
| H | -8.126544 | -7.24391 | 10.06344  | 0.1821  | 0.05434 |
| H | -8.36279  | -5.38406 | 8.414618  | 0.15866 | 0.06512 |

|   |          |          |           |         |         |
|---|----------|----------|-----------|---------|---------|
| H | 5.329724 | 0.42174  | -11.49654 | 0.18207 | 0.06963 |
| H | 6.423932 | -0.80213 | -13.36533 | 0.18475 | 0.05389 |
| H | 6.933791 | -3.21796 | -13.13843 | 0.14727 | 0.05325 |
| H | 6.351102 | -4.41527 | -11.04355 | 0.18278 | 0.05406 |
| H | 5.25339  | -3.17291 | -9.176996 | 0.14856 | 0.06478 |
| H | 7.527196 | 3.10276  | 7.588289  | 0.18189 | 0.06969 |
| H | 8.619432 | 4.6913   | 9.160327  | 0.18506 | 0.05393 |
| H | 8.282901 | 7.13304  | 8.892659  | 0.14734 | 0.05327 |
| H | 6.853192 | 7.99221  | 7.054304  | 0.18275 | 0.05406 |
| H | 5.76286  | 6.385    | 5.4855    | 0.1485  | 0.06477 |

**Table S7.** Cartesian coordinates of optimized structure of molecule **6**.

Total energy: -2429.46419270Hartrees

| Atom | x         | y        | z        | Mulliken charges | Lowdin Charges |
|------|-----------|----------|----------|------------------|----------------|
| C    | -0.804173 | 0.61527  | 0.25974  | -0.37493         | -0.03337       |
| C    | -0.574437 | -0.19561 | 1.43977  | -0.47705         | -0.03695       |
| N    | -1.317533 | -0.03315 | 2.51781  | 0.27193          | -0.03187       |
| C    | -2.350828 | 0.84181  | 2.47534  | -0.2012          | -0.05236       |
| C    | -2.65513  | 1.53999  | 1.27371  | 0.19874          | -0.04495       |
| N    | -1.845565 | 1.42145  | 0.19108  | 0.30598          | -0.03331       |
| C    | -3.168626 | 1.03937  | 3.61561  | -0.1458          | -0.0023        |
| C    | -4.249947 | 1.88132  | 3.54855  | 0.21759          | -0.01034       |
| C    | -4.575424 | 2.55234  | 2.33662  | -0.71155         | -0.03479       |
| C    | -3.790735 | 2.38114  | 1.21597  | -0.14552         | 0.00092        |
| C    | 0.107964  | 0.64489  | -0.91678 | 0.25783          | -0.07938       |
| C    | 0.451335  | -1.27121 | 1.52285  | 0.25814          | -0.07944       |
| N    | -5.701615 | 3.41229  | 2.30548  | 0.78148          | -0.02988       |
| C    | 1.500386  | 0.69051  | -0.77226 | -0.37355         | -0.0089        |
| C    | 2.329374  | 0.78787  | -1.88384 | -0.07036         | -0.01701       |
| C    | 1.780234  | 0.84364  | -3.16803 | -0.68338         | -0.03895       |
| C    | 0.391125  | 0.80934  | -3.32242 | 0.1659           | -0.01769       |
| C    | -0.432534 | 0.71548  | -2.2075  | -0.09133         | -0.00317       |
| C    | 0.661369  | -2.17789 | 0.47594  | -0.32764         | -0.00925       |
| C    | 1.578795  | -3.21426 | 0.60349  | -0.05318         | -0.01681       |
| C    | 2.30462   | -3.3697  | 1.78786  | -0.69391         | -0.03952       |
| C    | 2.094197  | -2.47697 | 2.84318  | 0.14411          | -0.0179        |
| C    | 1.175277  | -1.44358 | 2.71011  | -0.13065         | -0.00419       |
| N    | 2.625413  | 0.94089  | -4.3044  | 0.75884          | -0.02971       |

|   |           |          |          |          |          |
|---|-----------|----------|----------|----------|----------|
| N | 3.240815  | -4.42842 | 1.92018  | 0.75835  | -0.02988 |
| C | 2.650011  | 0.05283  | -5.38577 | 0.22592  | -0.02175 |
| C | -7.007637 | 3.05787  | 2.66556  | 0.25947  | -0.02317 |
| C | -5.700253 | 4.759    | 1.91648  | 0.31385  | -0.02033 |
| C | 2.963058  | -5.79078 | 1.75899  | 0.1843   | -0.02188 |
| C | 4.597437  | -4.28838 | 2.23353  | 0.22139  | -0.02186 |
| C | 1.749967  | -6.42263 | 1.48069  | -0.34979 | -0.05139 |
| C | 1.746984  | -7.81167 | 1.39739  | -0.44775 | -0.03816 |
| C | 2.919337  | -8.55893 | 1.59053  | -0.33752 | -0.06152 |
| C | 4.121705  | -7.92506 | 1.88129  | -0.21021 | -0.02252 |
| C | 4.152395  | -6.53021 | 1.97107  | 0.13385  | -0.06434 |
| C | 5.194782  | -5.57224 | 2.27217  | 0.21644  | -0.06409 |
| C | 6.559387  | -5.68893 | 2.55247  | -0.22175 | -0.02236 |
| C | 7.30468   | -4.53854 | 2.78335  | -0.34968 | -0.06145 |
| C | 6.699861  | -3.27321 | 2.72805  | -0.51051 | -0.03838 |
| C | 5.343761  | -3.12909 | 2.45093  | -0.28134 | -0.05231 |
| C | -7.511935 | 1.82198  | 3.07378  | -0.33099 | -0.05217 |
| C | -8.873122 | 1.73694  | 3.35149  | -0.45011 | -0.0374  |
| C | -9.717366 | 2.84994  | 3.21919  | -0.34932 | -0.05997 |
| C | -9.212649 | 4.0736   | 2.79431  | -0.2732  | -0.02183 |
| C | -7.84865  | 4.18648  | 2.51051  | 0.13405  | -0.06321 |
| C | -7.015254 | 5.27052  | 2.03521  | 0.16949  | -0.064   |
| C | -7.265698 | 6.60938  | 1.72045  | -0.27198 | -0.02223 |
| C | -6.213317 | 7.41438  | 1.30065  | -0.36497 | -0.05994 |
| C | -4.913461 | 6.89478  | 1.2013   | -0.38912 | -0.03649 |
| C | -4.63742  | 5.56569  | 1.50783  | -0.31771 | -0.04912 |
| C | 3.630199  | 0.48525  | -6.31253 | 0.23732  | -0.06407 |
| C | 3.852759  | -0.25603 | -7.47657 | -0.22462 | -0.02235 |
| C | 3.108334  | -1.4087  | -7.69862 | -0.35185 | -0.06134 |
| C | 2.15029   | -1.8305  | -6.76364 | -0.50766 | -0.03828 |
| C | 1.909118  | -1.11112 | -5.59709 | -0.30202 | -0.0522  |
| C | 3.580134  | 1.93905  | -4.53045 | 0.16741  | -0.02195 |
| C | 3.895839  | 3.05728  | -3.75711 | -0.35588 | -0.05141 |
| C | 4.883073  | 3.91554  | -4.23166 | -0.44448 | -0.03821 |
| C | 5.539957  | 3.6739   | -5.4483  | -0.33694 | -0.06145 |
| C | 5.211129  | 2.56638  | -6.22119 | -0.2063  | -0.02252 |
| C | 4.222268  | 1.68841  | -5.76774 | 0.13795  | -0.06421 |
| H | -2.914653 | 0.515    | 4.52904  | 0.20004  | 0.07183  |
| H | -4.866473 | 2.0545   | 4.42197  | 0.20188  | 0.07838  |
| H | -4.022418 | 2.8789   | 0.28292  | 0.21118  | 0.08832  |
| H | 1.945251  | 0.65022  | 0.21433  | 0.25115  | 0.07483  |
| H | 3.405321  | 0.81172  | -1.76117 | 0.20283  | 0.07793  |



|   |            |          |          |         |         |
|---|------------|----------|----------|---------|---------|
| H | -0.037675  | 0.87483  | -4.3151  | 0.20171 | 0.07725 |
| H | -1.508655  | 0.7149   | -2.32834 | 0.2187  | 0.07399 |
| H | 0.106098   | -2.07784 | -0.44843 | 0.24937 | 0.07481 |
| H | 1.741461   | -3.90233 | -0.21703 | 0.20335 | 0.07792 |
| H | 2.639153   | -2.60767 | 3.77031  | 0.20129 | 0.07712 |
| H | 0.996808   | -0.76872 | 3.53796  | 0.22202 | 0.07359 |
| H | 0.83757    | -5.85687 | 1.34066  | 0.16989 | 0.06728 |
| H | 0.816806   | -8.32528 | 1.182    | 0.16982 | 0.05398 |
| H | 2.882548   | -9.63958 | 1.5177   | 0.16046 | 0.05251 |
| H | 5.023374   | -8.50591 | 2.04102  | 0.13163 | 0.06033 |
| H | 7.032039   | -6.66435 | 2.58574  | 0.13259 | 0.06039 |
| H | 8.363081   | -4.61598 | 3.003    | 0.16129 | 0.05256 |
| H | 7.300232   | -2.38734 | 2.90184  | 0.17034 | 0.05387 |
| H | 4.888988   | -2.1478  | 2.40202  | 0.15503 | 0.0659  |
| H | -6.874185  | 0.95184  | 3.16469  | 0.16981 | 0.06737 |
| H | -9.287845  | 0.7878   | 3.67152  | 0.16984 | 0.05445 |
| H | -10.772879 | 2.74985  | 3.44341  | 0.16144 | 0.05295 |
| H | -9.870156  | 4.92823  | 2.67969  | 0.13184 | 0.06069 |
| H | -8.26738   | 7.01566  | 1.80641  | 0.13274 | 0.06056 |
| H | -6.394212  | 8.45338  | 1.05129  | 0.16204 | 0.05292 |
| H | -4.104223  | 7.54035  | 0.87937  | 0.16958 | 0.05462 |
| H | -3.629434  | 5.17844  | 1.43215  | 0.18224 | 0.06767 |
| H | 4.599484   | 0.0616   | -8.19589 | 0.1327  | 0.0604  |
| H | 3.270494   | -1.9915  | -8.59777 | 0.16132 | 0.05259 |
| H | 1.586211   | -2.73733 | -6.95053 | 0.17034 | 0.05391 |
| H | 1.173902   | -1.4504  | -4.87842 | 0.15525 | 0.0659  |
| H | 3.387718   | 3.25892  | -2.8226  | 0.16984 | 0.06719 |
| H | 5.146124   | 4.79087  | -3.64852 | 0.16984 | 0.05396 |
| H | 6.305433   | 4.36161  | -5.78828 | 0.16062 | 0.05253 |
| H | 5.712693   | 2.38844  | -7.166   | 0.13141 | 0.06035 |

**Table S8.** Cartesian coordinates of optimized structure of molecule 7.

Total energy: -2655.11089400Hartrees

| Atom | x        | y        | z        | Mulliken charges | Lowdin Charges |
|------|----------|----------|----------|------------------|----------------|
| C    | -0.44389 | 0.68438  | -0.66389 | -0.3942          | -0.0355        |
| C    | -0.71183 | -0.66027 | -1.13431 | -0.41447         | -0.03514       |
| N    | -1.38739 | -0.85954 | -2.24843 | 0.28616          | -0.02794       |
| C    | -1.90276 | 0.2123   | -2.90107 | -0.07394         | -0.04991       |

|   |          |          |          |          |          |
|---|----------|----------|----------|----------|----------|
| C | -1.75718 | 1.51994  | -2.36008 | -0.00767 | -0.04882 |
| N | -0.99917 | 1.72401  | -1.25394 | 0.31511  | -0.0259  |
| C | -2.63267 | 0.03249  | -4.10253 | -0.1727  | -0.00411 |
| C | -3.21047 | 1.11479  | -4.71931 | -0.02176 | -0.00619 |
| C | -3.08702 | 2.41764  | -4.16421 | -0.70233 | -0.05735 |
| C | -2.37222 | 2.61985  | -3.00765 | -0.18719 | 0.01569  |
| C | 0.48837  | 1.00149  | 0.45399  | 0.19876  | -0.0744  |
| C | -0.30639 | -1.88985 | -0.39755 | 0.22733  | -0.07484 |
| N | -3.71109 | 3.52893  | -4.81912 | 0.796    | -0.07999 |
| C | 1.73863  | 0.37905  | 0.56565  | -0.4834  | -0.01324 |
| C | 2.6306   | 0.75683  | 1.56387  | -0.05826 | -0.01325 |
| C | 2.28035  | 1.75125  | 2.47913  | -0.60927 | -0.05948 |
| C | 1.03579  | 2.37331  | 2.37808  | 0.02665  | -0.00719 |
| C | 0.15321  | 2.00997  | 1.36613  | -0.07059 | -0.0047  |
| C | 0.19176  | -2.98941 | -1.1074  | -0.10664 | -0.00603 |
| C | 0.52017  | -4.16945 | -0.44789 | -0.05457 | -0.00868 |
| C | 0.32772  | -4.27912 | 0.92963  | -0.6108  | -0.05965 |
| C | -0.18918 | -3.19561 | 1.6423   | -0.02183 | -0.01205 |
| C | -0.4934  | -2.00786 | 0.98591  | -0.45361 | -0.01289 |
| N | 3.19445  | 2.1499   | 3.5077   | 0.72557  | -0.08055 |
| N | 0.64495  | -5.50453 | 1.59997  | 0.72453  | -0.08069 |
| C | 4.15678  | 3.14708  | 3.24321  | 0.29247  | -0.02348 |
| C | -5.09217 | 3.75767  | -4.63253 | 0.36905  | -0.02463 |
| C | -3.06936 | 4.13842  | -5.91994 | 0.32012  | -0.02458 |
| C | 1.85077  | -5.62819 | 2.32068  | 0.30253  | -0.02366 |
| C | -0.34041 | -6.50417 | 1.73978  | 0.30488  | -0.02328 |
| C | 2.81407  | -4.61702 | 2.37167  | -0.23023 | -0.0509  |
| C | 4.00085  | -4.79359 | 3.08606  | -0.27443 | -0.04523 |
| C | 4.24158  | -5.98153 | 3.76465  | -0.2641  | -0.05434 |
| C | 3.28703  | -6.99964 | 3.72206  | -0.32129 | -0.02681 |
| C | 2.11416  | -6.82585 | 3.00635  | 0.00289  | -0.00086 |
| C | -0.02232 | -7.68094 | 2.43799  | 0.0048   | -0.00083 |
| C | -0.95293 | -8.6941  | 2.59752  | -0.31198 | -0.02721 |
| C | -2.23207 | -8.56472 | 2.05286  | -0.23349 | -0.05495 |
| C | -2.56255 | -7.4084  | 1.35757  | -0.31965 | -0.04621 |
| C | -1.62622 | -6.38365 | 1.20558  | -0.29849 | -0.04909 |
| C | -5.86871 | 3.02995  | -3.72701 | -0.12698 | -0.04899 |
| C | -7.22643 | 3.31135  | -3.56264 | -0.30638 | -0.04554 |
| C | -7.83001 | 4.31844  | -4.30513 | -0.23907 | -0.05331 |
| C | -7.06573 | 5.05003  | -5.21616 | -0.20279 | -0.02589 |
| C | -5.71686 | 4.77625  | -5.37038 | -0.20404 | -0.00106 |
| C | -3.74464 | 5.14879  | -6.62391 | -0.20182 | -0.00105 |

|   |          |          |          |          |          |
|---|----------|----------|----------|----------|----------|
| C | -3.15446 | 5.78989  | -7.70039 | -0.22703 | -0.0259  |
| C | -1.86155 | 5.44534  | -8.09891 | -0.24    | -0.05325 |
| C | -1.17814 | 4.45034  | -7.41115 | -0.30495 | -0.04544 |
| C | -1.77833 | 3.79849  | -6.33207 | -0.0998  | -0.04865 |
| C | 5.0561   | 3.50887  | 4.25972  | -0.0087  | -0.00111 |
| C | 6.01637  | 4.48535  | 4.05459  | -0.31755 | -0.0272  |
| C | 6.09776  | 5.14155  | 2.82472  | -0.24123 | -0.05487 |
| C | 5.21293  | 4.79932  | 1.80996  | -0.28336 | -0.04588 |
| C | 4.25262  | 3.80638  | 2.01471  | -0.31365 | -0.04883 |
| C | 3.31317  | 1.3861   | 4.68739  | 0.31384  | -0.0237  |
| C | 2.54224  | 0.24835  | 4.94023  | -0.23219 | -0.05081 |
| C | 2.68582  | -0.46253 | 6.13356  | -0.28133 | -0.04535 |
| C | 3.60662  | -0.05187 | 7.08922  | -0.251   | -0.05455 |
| C | 4.3852   | 1.08177  | 6.8474   | -0.30897 | -0.02684 |
| C | 4.23411  | 1.7914   | 5.66792  | -0.03019 | -0.00115 |
| O | 5.00038  | 2.93029  | 5.51296  | -0.15096 | -0.09743 |
| O | -5.00663 | 5.56851  | -6.25113 | -0.12885 | -0.09611 |
| O | 1.23391  | -7.88972 | 2.97278  | -0.15371 | -0.09746 |
| H | -2.72891 | -0.97002 | -4.5019  | 0.2138   | 0.07233  |
| H | -3.77683 | 0.99234  | -5.63508 | 0.18744  | 0.08243  |
| H | -2.26043 | 3.61094  | -2.58556 | 0.18408  | 0.0909   |
| H | 2.02833  | -0.38824 | -0.14176 | 0.24462  | 0.07466  |
| H | 3.60498  | 0.28759  | 1.63472  | 0.18658  | 0.08093  |
| H | 0.77158  | 3.14694  | 3.08943  | 0.18163  | 0.07908  |
| H | -0.80162 | 2.51178  | 1.27077  | 0.2273   | 0.074    |
| H | 0.3159   | -2.91277 | -2.18046 | 0.22398  | 0.07368  |
| H | 0.91812  | -5.01566 | -0.99562 | 0.18241  | 0.07913  |
| H | -0.355   | -3.29119 | 2.70902  | 0.19018  | 0.08093  |
| H | -0.89858 | -1.17764 | 1.55145  | 0.24024  | 0.07483  |
| H | 2.6361   | -3.68834 | 1.84613  | 0.12188  | 0.06874  |
| H | 4.72997  | -3.99236 | 3.10764  | 0.16409  | 0.05485  |
| H | 5.15884  | -6.12439 | 4.32264  | 0.1684   | 0.05431  |
| H | 3.43963  | -7.94221 | 4.234    | 0.18427  | 0.06987  |
| H | -0.65647 | -9.58034 | 3.14567  | 0.18354  | 0.06983  |
| H | -2.95417 | -9.3627  | 2.17543  | 0.15688  | 0.05391  |
| H | -3.55045 | -7.28966 | 0.9284   | 0.17363  | 0.0547   |
| H | -1.89448 | -5.48669 | 0.66324  | 0.1786   | 0.0717   |
| H | -5.40875 | 2.24591  | -3.14027 | 0.18409  | 0.07079  |
| H | -7.80331 | 2.73498  | -2.8491  | 0.1728   | 0.05498  |
| H | -8.88295 | 4.54098  | -4.18273 | 0.15848  | 0.05434  |
| H | -7.49887 | 5.84523  | -5.81092 | 0.18741  | 0.07014  |
| H | -3.71843 | 6.56228  | -8.20938 | 0.18721  | 0.07013  |

|   |          |          |          |         |         |
|---|----------|----------|----------|---------|---------|
| H | -1.40154 | 5.95482  | -8.93678 | 0.15804 | 0.05434 |
| H | -0.17319 | 4.17147  | -7.7051  | 0.17345 | 0.05498 |
| H | -1.23532 | 3.02777  | -5.8012  | 0.18416 | 0.07081 |
| H | 6.68624  | 4.72544  | 4.87153  | 0.18403 | 0.06976 |
| H | 6.84558  | 5.90999  | 2.67132  | 0.15658 | 0.05391 |
| H | 5.26016  | 5.29878  | 0.84947  | 0.17505 | 0.05481 |
| H | 3.56847  | 3.54784  | 1.21741  | 0.18646 | 0.07176 |
| H | 1.82252  | -0.0793  | 4.20199  | 0.12237 | 0.06875 |
| H | 2.0731   | -1.33983 | 6.30389  | 0.16467 | 0.05481 |
| H | 3.7243   | -0.60014 | 8.0159   | 0.16789 | 0.05423 |
| H | 5.11066  | 1.43648  | 7.56968  | 0.18451 | 0.06982 |

**Table S9.** Cartesian coordinates of optimized structure of molecule **8**.

Total energy:  $-3624.03272267$ Hartrees

| Atom | x        | y        | z        | Mulliken charges | Lowdin Charges |
|------|----------|----------|----------|------------------|----------------|
| C    | -0.25133 | 1.004801 | 0.11701  | -0.39229         | -0.03418       |
| C    | 0.90844  | 0.881153 | 0.97982  | -0.45958         | -0.03404       |
| N    | 1.33027  | 1.909907 | 1.68758  | 0.26874          | -0.02917       |
| C    | 0.71557  | 3.109196 | 1.53215  | -0.03982         | -0.04951       |
| C    | -0.33332 | 3.259376 | 0.58309  | 0.10504          | -0.05154       |
| N    | -0.80969 | 2.181046 | -0.08877 | 0.35087          | -0.02918       |
| C    | 1.14367  | 4.233943 | 2.27844  | -0.29275         | -0.0016        |
| C    | 0.55881  | 5.458642 | 2.06542  | 0.29243          | 0.00671        |
| C    | -0.47146 | 5.616169 | 1.1014   | -0.84962         | -0.05065       |
| C    | -0.91106 | 4.534598 | 0.37115  | -0.37067         | -0.00879       |
| C    | -0.91924 | -0.14717 | -0.55094 | 0.05875          | -0.07504       |
| C    | 1.72346  | -0.35983 | 1.10196  | 0.09437          | -0.07548       |
| N    | -1.02573 | 6.929233 | 0.92175  | 1.06758          | -0.10043       |
| C    | -1.14554 | -1.35831 | 0.11399  | -0.65809         | -0.00948       |
| C    | -1.84254 | -2.38975 | -0.50805 | 0.02081          | 0.00052        |
| C    | -2.3184  | -2.2342  | -1.80911 | -0.94279         | -0.05693       |
| C    | -2.10079 | -1.02719 | -2.47927 | 0.15949          | -0.03033       |
| C    | -1.41619 | 0.007552 | -1.85229 | -0.08245         | -0.00902       |
| C    | 2.20733  | -0.74514 | 2.35937  | -0.06955         | -0.00971       |
| C    | 3.01889  | -1.86593 | 2.49454  | 0.10095          | -0.03032       |
| C    | 3.38024  | -2.61206 | 1.36938  | -0.97243         | -0.05713       |
| C    | 2.91859  | -2.22351 | 0.1125   | 0.01367          | 0.0006         |
| C    | 2.09276  | -1.11143 | -0.01991 | -0.63921         | -0.00973       |

|   |          |          |          |          |          |
|---|----------|----------|----------|----------|----------|
| N | -3.0355  | -3.32088 | -2.41954 | 1.07317  | -0.09709 |
| N | 4.2269   | -3.77021 | 1.46855  | 1.07909  | -0.09702 |
| C | -4.45523 | -3.29029 | -2.38448 | -0.2272  | -0.04511 |
| C | -2.2547  | 7.248399 | 1.55881  | -0.12564 | -0.04488 |
| C | -0.50216 | 7.746307 | -0.11549 | -0.06003 | -0.0456  |
| C | 5.63171  | -3.57209 | 1.53851  | -0.20669 | -0.04489 |
| C | 3.64054  | -5.00417 | 1.85583  | -0.09173 | -0.04448 |
| C | 6.18712  | -2.31624 | 1.8201   | -0.14173 | -0.04667 |
| C | 7.56838  | -2.13942 | 1.87304  | -0.33862 | -0.03675 |
| C | 8.42766  | -3.21487 | 1.67521  | -0.22236 | -0.05761 |
| C | 7.88946  | -4.47016 | 1.40109  | 0.25716  | -0.06421 |
| C | 6.51067  | -4.64507 | 1.30453  | -0.01579 | -0.25859 |
| C | 4.33199  | -6.21184 | 1.65151  | -0.13194 | -0.25815 |
| C | 3.78087  | -7.42587 | 2.05565  | 0.34222  | -0.06336 |
| C | 2.50827  | -7.47453 | 2.61991  | -0.19017 | -0.05664 |
| C | 1.80132  | -6.28988 | 2.79509  | -0.35314 | -0.03693 |
| C | 2.36418  | -5.06793 | 2.43183  | -0.13372 | -0.04783 |
| C | -3.12331 | 6.256965 | 2.03438  | -0.13666 | -0.04548 |
| C | -4.31853 | 6.595385 | 2.66615  | -0.28328 | -0.03591 |
| C | -4.68962 | 7.927765 | 2.81124  | -0.23931 | -0.05609 |
| C | -3.8399  | 8.923668 | 2.33526  | 0.35231  | -0.06312 |
| C | -2.62336 | 8.59331  | 1.74197  | -0.20209 | -0.25792 |
| C | -0.70537 | 9.137587 | -0.08881 | -0.19107 | -0.25793 |
| C | -0.22389 | 9.946915 | -1.11551 | 0.31003  | -0.06301 |
| C | 0.51787  | 9.399804 | -2.16013 | -0.24231 | -0.05583 |
| C | 0.7518   | 8.02898  | -2.17922 | -0.34208 | -0.03636 |
| C | 0.23569  | 7.208017 | -1.17838 | -0.142   | -0.0451  |
| C | -5.19542 | -4.45488 | -2.65692 | 0.02685  | -0.25857 |
| C | -6.58839 | -4.42983 | -2.6561  | 0.24731  | -0.06413 |
| C | -7.27649 | -3.26353 | -2.32913 | -0.25627 | -0.05752 |
| C | -6.55379 | -2.1152  | -2.02387 | -0.32509 | -0.03671 |
| C | -5.16088 | -2.12213 | -2.06453 | -0.14579 | -0.04645 |
| C | -2.34397 | -4.16269 | -3.33069 | 0.07551  | -0.04412 |
| C | -1.10722 | -3.7989  | -3.88095 | -0.21623 | -0.04806 |
| C | -0.43855 | -4.64479 | -4.76368 | -0.3707  | -0.03694 |
| C | -0.99968 | -5.8599  | -5.14099 | -0.21096 | -0.05671 |
| C | -2.2316  | -6.23169 | -4.60737 | 0.30073  | -0.06332 |
| C | -2.88537 | -5.40979 | -3.69183 | -0.11484 | -0.25828 |
| S | -4.35421 | -6.00723 | -2.88324 | -0.52969 | 0.55945  |
| S | -1.47853 | 9.89211  | 1.32624  | -0.51832 | 0.55989  |
| S | 5.87112  | -6.21341 | 0.75707  | -0.52769 | 0.55934  |
| H | 1.94121  | 4.101666 | 2.99961  | 0.19914  | 0.07201  |

|   |          |          |          |         |         |
|---|----------|----------|----------|---------|---------|
| H | 0.87601  | 6.3318   | 2.6229   | 0.1848  | 0.07994 |
| H | -1.7027  | 4.631071 | -0.36217 | 0.20382 | 0.09214 |
| H | -0.79133 | -1.49671 | 1.12791  | 0.24503 | 0.0744  |
| H | -2.02749 | -3.32234 | 0.01156  | 0.18662 | 0.07923 |
| H | -2.47564 | -0.89986 | -3.48841 | 0.18837 | 0.08127 |
| H | -1.26793 | 0.950073 | -2.36444 | 0.22701 | 0.07374 |
| H | 1.94648  | -0.15404 | 3.22849  | 0.23149 | 0.07385 |
| H | 3.38079  | -2.16321 | 3.47212  | 0.1883  | 0.08126 |
| H | 3.21393  | -2.7983  | -0.75712 | 0.18669 | 0.07931 |
| H | 1.74823  | -0.82225 | -1.00509 | 0.23979 | 0.0744  |
| H | 5.53979  | -1.46647 | 1.98494  | 0.19295 | 0.07038 |
| H | 7.96577  | -1.15266 | 2.08127  | 0.17534 | 0.05544 |
| H | 9.50178  | -3.08379 | 1.72839  | 0.15613 | 0.05393 |
| H | 8.53973  | -5.32218 | 1.23805  | 0.17528 | 0.06076 |
| H | 4.34906  | -8.33672 | 1.90452  | 0.17464 | 0.06088 |
| H | 2.07882  | -8.42519 | 2.91217  | 0.15939 | 0.05421 |
| H | 0.80687  | -6.30532 | 3.22622  | 0.17454 | 0.05514 |
| H | 1.79865  | -4.15999 | 2.58673  | 0.1525  | 0.06784 |
| H | -2.86233 | 5.214028 | 1.92365  | 0.19371 | 0.06892 |
| H | -4.9628  | 5.804876 | 3.03343  | 0.17594 | 0.05574 |
| H | -5.62453 | 8.194008 | 3.28949  | 0.1582  | 0.05437 |
| H | -4.10659 | 9.969158 | 2.44061  | 0.17629 | 0.06109 |
| H | -0.41653 | 11.01314 | -1.07905 | 0.1759  | 0.06112 |
| H | 0.90646  | 10.03923 | -2.9436  | 0.15814 | 0.05438 |
| H | 1.3292   | 7.58382  | -2.98133 | 0.17546 | 0.05556 |
| H | 0.41962  | 6.143647 | -1.22046 | 0.19015 | 0.06913 |
| H | -7.13023 | -5.33847 | -2.89307 | 0.17604 | 0.06077 |
| H | -8.35972 | -3.25825 | -2.31155 | 0.15599 | 0.05394 |
| H | -7.06875 | -1.1981  | -1.76168 | 0.17625 | 0.05545 |
| H | -4.62169 | -1.21459 | -1.832   | 0.19031 | 0.07051 |
| H | -0.65527 | -2.85561 | -3.60916 | 0.15086 | 0.06781 |
| H | 0.52217  | -4.33914 | -5.16198 | 0.17583 | 0.05513 |
| H | -0.48851 | -6.51476 | -5.83634 | 0.15874 | 0.05418 |
| H | -2.68576 | -7.17686 | -4.88252 | 0.17568 | 0.06087 |

**Table S10.** Cartesian coordinates of optimized structure of molecule **9**.

Total energy: -1740.31850225Hartrees

| Atom | x         | y        | z       | Mulliken charges | Lowdin Charges |
|------|-----------|----------|---------|------------------|----------------|
| C    | -0.730878 | 0.297    | 0.42527 | -0.37205         | -0.034         |
| C    | 0.114748  | -0.65656 | 1.12239 | -0.55276         | -0.04693       |

|   |           |          |          |          |          |
|---|-----------|----------|----------|----------|----------|
| N | -0.267877 | -1.16109 | 2.28139  | 0.22928  | -0.03803 |
| C | -1.495515 | -0.84671 | 2.75758  | -0.32823 | -0.06912 |
| C | -2.384074 | -0.03292 | 2.0014   | 0.4151   | -0.0436  |
| N | -1.954521 | 0.54978  | 0.84987  | 0.26198  | -0.04902 |
| C | -1.949134 | -1.36652 | 3.99088  | -0.2235  | -0.00446 |
| C | -3.222207 | -1.10594 | 4.43611  | 0.44994  | -0.04626 |
| C | -4.130778 | -0.29718 | 3.68279  | -0.82949 | -0.03646 |
| C | -3.687078 | 0.22321  | 2.47102  | -0.44119 | -0.04264 |
| C | -0.288513 | 1.07879  | -0.75843 | 0.09491  | -0.09886 |
| C | 1.409222  | -1.15793 | 0.59394  | 0.18059  | -0.09899 |
| C | 0.990375  | 1.64897  | -0.84822 | -0.5905  | -0.00769 |
| C | 1.351422  | 2.44547  | -1.92276 | 0.06453  | -0.04757 |
| C | 0.455868  | 2.69706  | -2.98099 | -0.84648 | -0.04359 |
| C | -0.824951 | 2.12321  | -2.89101 | 0.36133  | -0.06393 |
| C | -1.187947 | 1.34976  | -1.79365 | 0.07517  | -0.00253 |
| C | 2.4825    | -1.38605 | 1.46845  | -0.19384 | -0.00576 |
| C | 3.687325  | -1.89963 | 1.01788  | -0.04008 | -0.04993 |
| C | 3.873536  | -2.24477 | -0.33604 | -0.7374  | -0.04459 |
| C | 2.7875    | -2.04429 | -1.20578 | 0.21003  | -0.06261 |
| C | 1.59026   | -1.50206 | -0.7484  | -0.24448 | -0.00841 |
| N | 0.835107  | 3.53224  | -4.04803 | 0.25545  | -0.16338 |
| N | 5.117028  | -2.73046 | -0.78322 | 0.24513  | -0.16354 |
| N | -5.416966 | -0.01    | 4.1677   | 0.2357   | -0.16015 |
| C | -0.167284 | 3.88673  | -5.04969 | -0.01461 | -0.03146 |
| C | 0.316841  | 5.07705  | -5.87382 | -0.53917 | 0.02527  |
| O | 1.578802  | 4.82532  | -6.47787 | -0.11578 | -0.23137 |
| C | 2.557307  | 4.52794  | -5.48962 | -0.36772 | 0.02313  |
| C | 2.154794  | 3.31828  | -4.65509 | -0.14585 | -0.01731 |
| C | -5.829243 | -0.52801 | 5.47087  | -0.08794 | -0.02882 |
| C | -7.053075 | 0.23227  | 5.97741  | -0.44418 | 0.02468  |
| O | -8.125205 | 0.19574  | 5.0465   | -0.10803 | -0.22953 |
| C | -7.72453  | 0.76544  | 3.80685  | -0.34741 | 0.02378  |
| C | -6.53121  | 0.02741  | 3.21288  | -0.21046 | -0.01481 |
| C | 5.299574  | -2.96059 | -2.2142  | -0.0351  | -0.03213 |
| C | 6.783533  | -3.11969 | -2.5346  | -0.53048 | 0.02449  |
| O | 7.383632  | -4.15608 | -1.76947 | -0.1169  | -0.23097 |
| C | 7.243156  | -3.89545 | -0.37844 | -0.35239 | 0.02302  |
| C | 5.777723  | -3.76842 | 0.01911  | -0.17319 | -0.01696 |
| H | -1.27804  | -1.99791 | 4.56151  | 0.1865   | 0.06827  |
| H | -3.540531 | -1.54894 | 5.36921  | 0.18122  | 0.05932  |
| H | -4.301624 | 0.87638  | 1.8667   | 0.20386  | 0.0698   |
| H | 1.70851   | 1.49235  | -0.05267 | 0.2387   | 0.07406  |

|   |           |          |          |         |         |
|---|-----------|----------|----------|---------|---------|
| H | 2.331951  | 2.90452  | -1.92236 | 0.1502  | 0.05992 |
| H | -1.54945  | 2.26946  | -3.68054 | 0.17196 | 0.05885 |
| H | -2.188028 | 0.93689  | -1.73918 | 0.23269 | 0.07085 |
| H | 2.363273  | -1.1424  | 2.51723  | 0.21553 | 0.07082 |
| H | 4.501212  | -2.01171 | 1.72315  | 0.15804 | 0.0584  |
| H | 2.857558  | -2.32639 | -2.24731 | 0.17237 | 0.05967 |
| H | 0.778326  | -1.37205 | -1.45374 | 0.23866 | 0.0734  |
| H | -1.09448  | 4.17001  | -4.54736 | 0.13757 | 0.06066 |
| H | -0.386137 | 3.04045  | -5.72301 | 0.1692  | 0.06153 |
| H | 0.383791  | 5.96667  | -5.23062 | 0.14732 | 0.05676 |
| H | -0.381348 | 5.2823   | -6.68716 | 0.18762 | 0.05541 |
| H | 2.702757  | 5.40014  | -4.83525 | 0.14589 | 0.056   |
| H | 3.487738  | 4.32857  | -6.02431 | 0.1807  | 0.05518 |
| H | 2.902361  | 3.15673  | -3.87978 | 0.11468 | 0.05421 |
| H | 2.138508  | 2.42217  | -5.29796 | 0.17331 | 0.06462 |
| H | -5.023506 | -0.38321 | 6.19245  | 0.12584 | 0.0589  |
| H | -6.061041 | -1.6053  | 5.42429  | 0.17055 | 0.06276 |
| H | -6.776706 | 1.2767   | 6.18462  | 0.14735 | 0.05684 |
| H | -7.422926 | -0.22298 | 6.89782  | 0.18599 | 0.05589 |
| H | -7.473801 | 1.827    | 3.94939  | 0.14631 | 0.0565  |
| H | -8.584033 | 0.69279  | 3.13818  | 0.17994 | 0.05606 |
| H | -6.226783 | 0.53561  | 2.29998  | 0.10436 | 0.05568 |
| H | -6.833081 | -0.99764 | 2.94223  | 0.19077 | 0.06658 |
| H | 4.918028  | -2.10083 | -2.769   | 0.13167 | 0.05963 |
| H | 4.754109  | -3.85731 | -2.55428 | 0.17169 | 0.06185 |
| H | 7.304904  | -2.16959 | -2.34595 | 0.14957 | 0.05606 |
| H | 6.915887  | -3.39117 | -3.58346 | 0.18461 | 0.05531 |
| H | 7.78189   | -2.97251 | -0.11717 | 0.14025 | 0.05566 |
| H | 7.706615  | -4.7347  | 0.14324  | 0.18371 | 0.0555  |
| H | 5.718665  | -3.51825 | 1.07734  | 0.10769 | 0.05412 |
| H | 5.275555  | -4.73971 | -0.12394 | 0.18379 | 0.06599 |



### 13. Vertical electronic Transition in implicit water of 1–9.

#### Molecule 1

|         |        |                                                                              |                                  |
|---------|--------|------------------------------------------------------------------------------|----------------------------------|
| 376.1nm | 0.6831 | (HOMO→LUMO)                                                                  | (98%)                            |
| 349.7nm | 0.0059 | (HOMO-2 → LUMO)<br>(HOMO-3 → LUMO)                                           | (51%)<br>(33%)                   |
| 332.0nm | 0.0323 | (HOMO-1 → LUMO)                                                              | (86%)                            |
| 307.3nm | 0.4349 | (HOMO → LUMO+1)                                                              | (92%)                            |
| 301.4nm | 0.0226 | (HOMO-3 → LUMO)<br>(HOMO-2 → LUMO)                                           | (54%)<br>(38%)                   |
| 294.9nm | 0.0041 | (HOMO-4 →LUMO)<br>(HOMO-2 → LUMO)                                            | (95%)<br>(38%)                   |
| 291.0nm | 0.2854 | (HOMO-1 → LUMO+1)<br>(HOMO-5 → LUMO)<br>(HOMO-2 → LUMO+1)                    | (48%)<br>(51%)<br>(51%)          |
| 280.2nm | 0.0278 | (HOMO-2 → LUMO+1)<br>(HOMO-3 → LUMO+1)<br>(HOMO-5 → LUMO)<br>(HOMO-6 → LUMO) | (33%)<br>(26%)<br>(15%)<br>(12%) |
| 279.8nm | 0.1918 | (HOMO-6 → LUMO)<br>(HOMO-2 → LUMO+1)                                         | (53%)<br>(11%)                   |
| 276.3nm | 1.0545 | (HOMO-5 → LUMO)<br>(HOMO-1 → LUMO+1)<br>(HOMO-6 → LUMO)                      | (38%)<br>(35%)<br>(18%)          |

#### Molecule 2

|         |        |                                                           |                         |
|---------|--------|-----------------------------------------------------------|-------------------------|
| 504.3nm | 0.7615 | (HOMO → LUMO )                                            | (96%)                   |
| 459.0nm | 0.1127 | (HOMO-1 → LUMO )                                          | (97%)                   |
| 439.9nm | 0.0269 | (HOMO-2 → LUMO )                                          | (96%)                   |
| 400.4nm | 0.5388 | (HOMO → LUMO+1)                                           | (96%)                   |
| 377.0nm | 0.6757 | (HOMO-1 → LUMO+1)                                         | (93%)                   |
| 356.6nm | 0.0101 | (HOMO-2 → LUMO+1)                                         | (90%)                   |
| 347.1nm | 0.0527 | (HOMO → LUMO+2)<br>(HOMO-1 → LUMO+3)                      | (71%)<br>(11%)          |
| 344.3nm | 0.0157 | (HOMO-6 → LUMO )<br>(HOMO-4 → LUMO)<br>(HOMO-10 → LUMO)   | (38%)<br>(25%)<br>(14%) |
| 341.0nm | 0.0260 | (HOMO-1 → LUMO+2)<br>(HOMO → LUMO+3)                      | (49%)<br>(36%)          |
| 327.6nm | 0.3035 | (HOMO → LUMO+7)<br>(HOMO-2 → LUMO+7)<br>(HOMO-1 → LUMO+7) | (70%)<br>(13%)<br>(11%) |

### Molecule 3

|         |        |                                                           |                         |
|---------|--------|-----------------------------------------------------------|-------------------------|
| 489.1nm | 0.7793 | (HOMO → LUMO)                                             | (96%)                   |
| 443.1nm | 0.1380 | (HOMO-1 → LUMO)                                           | (95%)                   |
| 424.2nm | 0.0263 | (HOMO-2 → LUMO)                                           | (96%)                   |
| 404.6nm | 0.2987 | (HOMO → LUMO+1)                                           | (71%)                   |
| 395.3nm | 0.2400 | (HOMO → LUMO+3)<br>(HOMO-1 → LUMO+1)<br>(HOMO-1 → LUMO+3) | (47%)<br>(18%)<br>(14%) |
| 389.7nm | 0.1600 | (HOMO → LUMO+2)<br>(HOMO-2 → LUMO+1)                      | (50%)<br>(10%)          |
| 380.6nm | 0.1435 | (HOMO → LUMO+4)<br>(HOMO-1 → LUMO+3)                      | (71%)<br>(11%)          |
| 367.9nm | 0.5209 | (HOMO-1 → LUMO+1)<br>(HOMO-1 → LUMO+4)<br>(HOMO → LUMO+3) | (59%)<br>(18%)<br>(16%) |
| 355.7nm | 0.0578 | (HOMO-1 → LUMO+3)<br>(HOMO → LUMO+3)<br>(HOMO → LUMO+4)   | (45%)<br>(18%)<br>(13%) |
| 353.5nm | 0.0040 | (HOMO-1 → LUMO+2)<br>(HOMO-2 → LUMO+1)<br>(HOMO → LUMO+2) | (34%)<br>(29%)<br>(21%) |

### Molecule 4

|         |        |                                                       |                         |
|---------|--------|-------------------------------------------------------|-------------------------|
| 535.6nm | 0.7159 | (HOMO → LUMO)                                         | (96%)                   |
| 487.4nm | 0.1214 | (HOMO-1 → LUMO)                                       | (98%)                   |
| 468.5nm | 0.0227 | (HOMO-2 → LUMO)                                       | (96%)                   |
| 416.3nm | 0.5881 | (HOMO → LUMO+1)                                       | (96%)                   |
| 391.1nm | 0.6944 | (HOMO-1 → LUMO+1)                                     | (93%)                   |
| 371.9nm | 0.0487 | (HOMO-2 → LUMO+1)<br>(HOMO → LUMO+2)                  | (62%)<br>(23%)          |
| 370.3nm | 0.0304 | (HOMO → LUMO+2)<br>(HOMO-2 → LUMO+1)                  | (50%)<br>(27%)          |
| 364.2nm | 0.0300 | (HOMO-1 → LUMO+2)<br>(HOMO → LUMO+3)                  | (49%)<br>(35%)          |
| 346.9nm | 0.0772 | (HOMO → LUMO+4)<br>(HOMO-2 → LUMO+4)                  | (60%)<br>(29%)          |
| 343.6nm | 0.0146 | (HOMO-8 → LUMO)<br>(HOMO-7 → LUMO)<br>(HOMO-9 → LUMO) | (56%)<br>(12%)<br>(10%) |

**Molecule 5**

|         |        |                                                             |                         |
|---------|--------|-------------------------------------------------------------|-------------------------|
| 550.2nm | 1.2040 | (HOMO → LUMO)                                               | (73%)                   |
| 533.0nm | 1.3723 | (HOMO → LUMO+1)<br>(HOMO-1 → LUMO+1)                        | (56%)<br>(17%)          |
| 524.6nm | 0.4151 | (HOMO → LUMO+2)<br>(HOMO-1 → LUMO+1)<br>(HOMO-2 → LUMO)     | (60%)<br>(16%)<br>(14%) |
| 492.2nm | 0.0576 | (HOMO-1 → LUMO)<br>(HOMO → LUMO+1)                          | (58%)<br>(21%)          |
| 490.4nm | 0.1715 | (HOMO-1 → LUMO+1)<br>(HOMO → LUMO+1)<br>(HOMO-1 → LUMO)     | (45%)<br>(15%)<br>(13%) |
| 478.7nm | 0.0544 | (HOMO-1 → LUMO+2)<br>(HOMO-2 → LUMO)<br>(HOMO → LUMO+2)     | (33%)<br>(28%)<br>(18%) |
| 477.2nm | 0.0049 | (HOMO-5 → LUMO)<br>(HOMO-5 → LUMO+2)                        | (73%)<br>(14%)          |
| 474.8nm | 0.0150 | (HOMO-4 → LUMO+1)<br>(HOMO-3 → LUMO+1)                      | (63%)<br>(14%)          |
| 474.4nm | 0.0092 | (HOMO-3 → LUMO+2)<br>(HOMO-4 → LUMO+2)<br>(HOMO-3 → LUMO+1) | (46%)<br>(19%)<br>(12%) |
| 472.8nm | 0.2701 | (HOMO → LUMO+3)                                             | (77%)                   |

**Molecule 6**

|         |        |                                                                            |                                  |
|---------|--------|----------------------------------------------------------------------------|----------------------------------|
| 455.1nm | 0.4956 | (HOMO → LUMO)<br>(HOMO-2 → LUMO)                                           | (81%)<br>(16%)                   |
| 430.2nm | 0.0505 | (HOMO-1 → LUMO)<br>(HOMO-2 → LUMO)                                         | (75%)<br>(16%)                   |
| 426.5nm | 0.0221 | (HOMO-2 → LUMO)<br>(HOMO-1 → LUMO)<br>(HOMO → LUMO)                        | (67%)<br>(22%)<br>(10%)          |
| 380.5nm | 0.0004 | (HOMO-5 → LUMO)<br>(HOMO-1 → LUMO)                                         | (100%)<br>(22%)                  |
| 369.1nm | 0.0000 | (HOMO-3 → LUMO)<br>(HOMO-1 → LUMO)                                         | (99%)<br>(22%)                   |
| 369.0nm | 0.0000 | (HOMO-4 → LUMO)<br>(HOMO-1 → LUMO)                                         | (99%)<br>(22%)                   |
| 364.9nm | 0.2899 | (HOMO → LUMO+1)<br>(HOMO-1 → LUMO)                                         | (96%)<br>(22%)                   |
| 355.7nm | 0.2677 | (HOMO-1 → LUMO+1)<br>(HOMO → LUMO)                                         | (93%)<br>(10%)                   |
| 348.9nm | 0.0198 | (HOMO-11 → LUMO)<br>(HOMO-9 → LUMO)<br>(HOMO-7 → LUMO)<br>(HOMO-10 → LUMO) | (34%)<br>(21%)<br>(20%)<br>(16%) |
| 346.8nm | 0.0073 | (HOMO-2 → LUMO+1)<br>(HOMO-7 → LUMO)                                       | (90%)<br>(20%)                   |

**Molecule 7**

|         |        |                                                                            |                                  |
|---------|--------|----------------------------------------------------------------------------|----------------------------------|
| 584.9nm | 0.0000 | (HOMO-2 → LUMO)                                                            | (99%)                            |
| 559.8nm | 0.0009 | (HOMO → LUMO)                                                              | (99%)                            |
| 556.1nm | 0.0000 | (HOMO-1 → LUMO)                                                            | (99%)                            |
| 442.1nm | 0.0036 | (HOMO → LUMO+1)                                                            | (96%)                            |
| 440.2nm | 0.0017 | (HOMO-1 → LUMO+1)                                                          | (96%)                            |
| 431.1nm | 0.0004 | (HOMO-2 → LUMO+1)                                                          | (98%)                            |
| 362.4nm | 0.0001 | (HOMO → LUMO+2)<br>(HOMO → LUMO+3)                                         | (68%)<br>(21%)                   |
| 360.5nm | 0.0000 | (HOMO-1 → LUMO+2)<br>(HOMO-1 → LUMO+3)                                     | (67%)<br>(23%)                   |
| 354.8nm | 0.6874 | (HOMO-6 → LUMO)                                                            | (91%)                            |
| 350.1nm | 0.0104 | (HOMO-11 → LUMO)<br>(HOMO-7 → LUMO)<br>(HOMO-12 → LUMO)<br>(HOMO-9 → LUMO) | (35%)<br>(20%)<br>(15%)<br>(12%) |

**Molecule 8**

|         |        |                                                                           |                                  |
|---------|--------|---------------------------------------------------------------------------|----------------------------------|
| 529.9nm | 0.0013 | (HOMO-2 → LUMO)                                                           | (99%)                            |
| 501.6nm | 0.0006 | (HOMO → LUMO)                                                             | (99%)                            |
| 501.1nm | 0.0009 | (HOMO-1 → LUMO)                                                           | (99%)                            |
| 403.2nm | 0.0005 | (HOMO-1 → LUMO+1)                                                         | (95%)                            |
| 402.9nm | 0.0002 | (HOMO → LUMO+1)                                                           | (95%)                            |
| 397.2nm | 0.0001 | (HOMO-2 → LUMO+1)                                                         | (98%)                            |
| 362.5nm | 0.0606 | (HOMO-5 → LUMO)                                                           | (94%)                            |
| 359.1nm | 0.6655 | (HOMO-6 → LUMO)                                                           | (92%)                            |
| 352.5nm | 0.0056 | (HOMO-13 → LUMO)<br>(HOMO-4 → LUMO)<br>(HOMO-7 → LUMO)<br>(HOMO-3 → LUMO) | (50%)<br>(19%)<br>(12%)<br>(11%) |
| 350.2nm | 0.0001 | (HOMO-3 → LUMO)<br>(HOMO-4 → LUMO)<br>(HOMO-7 → LUMO)                     | (64%)<br>(35%)<br>(12%)          |

**Molecule 9**

|         |        |                                                                            |                                  |
|---------|--------|----------------------------------------------------------------------------|----------------------------------|
| 463.0nm | 0.6499 | (HOMO → LUMO)                                                              | (99%)                            |
| 405.4nm | 0.0497 | (HOMO-1 → LUMO)                                                            | (98%)                            |
| 379.4nm | 0.0843 | (HOMO-2 → LUMO)                                                            | (94%)                            |
| 352.1nm | 0.5445 | (HOMO → LUMO+1)                                                            | (95%)                            |
| 340.6nm | 0.0435 | (HOMO-3 → LUMO)<br>(HOMO-4 → LUMO)<br>(HOMO-5 → LUMO)                      | (50%)<br>(29%)<br>(10%)          |
| 322.2nm | 0.7996 | (HOMO-1 → LUMO+1)<br>(HOMO-4 → LUMO)                                       | (95%)<br>(29%)                   |
| 306.2nm | 0.0820 | (HOMO → LUMO+2)<br>(HOMO-5 → LUMO)                                         | (89%)<br>(10%)                   |
| 300.9nm | 0.2604 | (HOMO-2 → LUMO+1)<br>(HOMO-3 → LUMO)<br>(HOMO-4 → LUMO)                    | (52%)<br>(15%)<br>(15%)          |
| 294.7nm | 0.0041 | (HOMO-5 → LUMO)<br>(HOMO-4 → LUMO)<br>(HOMO-1 → LUMO+2)                    | (37%)<br>(32%)<br>(11%)          |
| 289.1nm | 0.2709 | (HOMO-2 → LUMO+1)<br>(HOMO-3 → LUMO)<br>(HOMO-5 → LUMO)<br>(HOMO-4 → LUMO) | (38%)<br>(22%)<br>(20%)<br>(10%) |
